# Supplementary material
Source: publisher site journal article supplement (https://www.dovepress.com/get_supplementary_file.php?f=272952.xlsx)
Supplement: Supplementary file 1 [file get_supplementary_file.php]

## Sheet: Individual Sample Data
					Supplementary file. Data represents normalized expression of each gene in four different models (n=3 each model) based on DNA microarray.
				Sciatic nerve transection 1	Sciatic nerve transection 2	Sciatic nerve transection 3	Sural nerve transection 1	Sural nerve transection 2	Sural nerve transection 3	SNI 1	SNI 2	SNI 3	Sham 1	Sham 1	Sham 3
FeatureNum	ProbeName	GeneName	SystematicName	Normalized	Normalized	Normalized	Normalized	Normalized	Normalized	Normalized	Normalized	Normalized	Normalized	Normalized	Normalized
1	GE_BrightCorner	GE_BrightCorner	GE_BrightCorner	53.9898	41.3891	42.4736	42.0707	44.1477	46.2892	44.389	46.113	48.7292	44.6078	46.4944	47.5285
2	DarkCorner	DarkCorner	DarkCorner	0.00754533	0.00702899	0.00686656	0.00640108	0.00972735	0.0104675	0.00896926	0.00809007	0.00809112	0.00738499	0.00876185	0.0104068
3	DarkCorner	DarkCorner	DarkCorner	0.00761643	0.00710195	0.00694846	0.00648216	0.00983888	0.0105417	0.00905676	0.00816119	0.00817216	0.00745677	0.00883999	0.0104568
4	A_55_P2051983	Spink7	NM_001001803	0.0076926	0.00718404	0.00701685	0.00655952	0.00992129	0.0106182	0.00913607	0.00824369	0.00824927	0.00753065	0.00889643	0.0105069
5	A_52_P169082	Dbil5	NM_021294	0.128211	0.136416	0.162544	0.157073	0.149595	0.1485	0.177154	0.142053	0.11407	0.150193	0.21745	0.118748
6	A_30_P01028193	chr14:47978277-47985238_F	chr14:47978277-47985238_F	0.00782193	0.00731794	0.00715067	0.00670324	0.0100932	0.0464374	0.0180231	0.0175909	0.00839489	0.00765671	0.00901192	0.0105863
7	A_52_P237997	Negr1	NM_177274	0.029937	0.0296249	0.0375312	0.0432936	0.0311355	0.0504294	0.0562004	0.0699256	0.048428	0.0415455	0.0558534	0.0468523
8	A_51_P414243	Pomgnt2	NM_153540	23.9185	23.8342	19.3685	23.1902	22.9748	24.0156	21.7157	21.9946	23.6557	25.1839	23.2561	22.9774
9	A_55_P2136348	Ccr8	NM_007720	0.0103022	0.00749383	0.021944	0.00688955	0.0103097	0.0109026	0.0159033	0.00855199	0.0118224	0.00780826	0.00914578	0.0106884
10	A_51_P108228	Chrna7	NM_007390	0.218577	0.203166	0.157791	0.24891	0.251343	0.249712	0.220456	0.23596	0.243422	0.23594	0.234339	0.318545
11	A_30_P01033363	chr7:134807861-134809001_R	chr7:134807861-134809001_R	0.0628949	0.0389761	0.0402244	0.0445789	0.0436578	0.034438	0.0573744	0.0320709	0.052519	0.0322725	0.0374897	0.0163557
12	A_55_P2049737	LOC102638932	XR_375334	0.00811779	0.00763464	0.0135624	0.00704306	0.0104791	0.0110065	0.0096083	0.00868484	0.00870355	0.00793114	0.00924262	0.0107547
13	A_30_P01024440	chr17:3213918-3257944_F	chr17:3213918-3257944_F	0.328238	0.3553	0.383803	0.383922	0.449979	0.399314	0.343734	0.366454	0.368068	0.386585	0.333698	0.37331
14	A_30_P01025554	chr8:72663591-72671154_F	chr8:72663591-72671154_F	1.56919	1.50455	1.65664	1.55376	1.55085	1.41827	1.22363	1.29237	1.34325	1.69151	1.73435	1.49631
15	A_30_P01031558	chr17:13812666-13820504_R	chr17:13812666-13820504_R	0.0296342	0.0200834	0.0351092	0.0288154	0.0398562	0.0166558	0.0114559	0.0441602	0.0381885	0.0235042	0.0366795	0.0398048
16	A_30_P01030675	chr6:67054389-67054857_F	chr6:67054389-67054857_F	0.076775	0.052291	0.0393775	0.0573082	0.0828673	0.0691741	0.0706285	0.0715569	0.130716	0.0786772	0.104944	0.0970734
17	A_51_P328014	Cops3	NM_011991	4.54267	4.5976	3.62621	4.52322	4.47597	4.58675	4.34258	3.80939	4.84442	4.96669	4.28918	4.61909
18	A_30_P01019108	chr3:4797557-4798821_F	chr3:4797557-4798821_F	0.352676	0.250318	0.290528	0.30399	0.292284	0.338919	0.335777	0.384969	0.224079	0.227109	0.216321	0.216584
19	A_55_P2056220	A_55_P2056220	A_55_P2056220	2.68126	3.0756	2.45633	2.84551	2.71665	3.03147	2.68464	2.58013	2.93356	2.87014	2.7786	2.55384
20	A_55_P1985764	AV310571	AV310571	33.345	34.2198	28.1495	38.3015	36.1427	35.9288	33.2701	34.8172	36.5819	39.312	35.6682	38.1047
21	A_52_P108321	Ccdc71	NM_133744	0.181063	0.203559	0.192643	0.233192	0.192004	0.222845	0.168973	0.227071	0.175879	0.243899	0.209103	0.188651
22	A_55_P2018002	Abcg4	NM_138955	9.84963	9.36437	8.33938	9.81591	8.83524	9.70936	8.90541	9.37177	9.06091	10.4074	10.4985	9.20416
23	A_52_P123354	Tusc2	NM_019742	5.3124	4.67117	3.88825	5.42208	5.17935	5.20196	4.98909	5.01732	5.31818	5.51176	5.1667	5.54
24	A_30_P01023685	chr11:76400207-76434732_F	chr11:76400207-76434732_F	0.0205953	0.00787632	0.00769048	0.00735489	0.0687412	0.0110613	0.00980838	0.00888858	0.00888962	0.00812784	0.00929783	0.010767
25	A_55_P2061724	Smad4	XM_006525702	0.186383	0.189311	0.174445	0.186616	0.220064	0.175189	0.178644	0.2307	0.17208	0.156264	0.169751	0.175553
26	A_55_P2049122	Tm6sf2	NM_181540	0.934184	0.765506	0.806304	0.653265	0.780027	0.774343	0.747904	0.884898	0.812324	0.713654	0.636715	0.80578
27	ERCC-00014_76	ERCC-00014_76	ERCC-00014_76	0.00830064	0.00787089	0.0125711	0.0073696	0.0107265	0.0110017	0.016024	0.0127283	0.00886616	0.00811463	0.00924843	0.0107195
28	A_30_P01020389	chr9:113648970-113715170_R	chr9:113648970-113715170_R	0.0127392	0.00808132	0.0208133	0.00888702	0.0107146	0.0109771	0.00977392	0.0290732	0.0237985	0.00857011	0.00922827	0.0107006
29	A_55_P1988844	Klrg1	NM_016970	0.00827909	0.017442	0.01005	0.00736761	0.0187766	0.0109504	0.00975926	0.0143376	0.00883816	0.0109708	0.0092061	0.0256882
30	A_51_P385099	Tnf	NM_013693	0.0260936	0.0217399	0.0390329	0.0103196	0.0238351	0.0109213	0.0163613	0.0278188	0.0204311	0.0151858	0.0140339	0.0384638
31	A_55_P2111005	Pafah1b1	NM_013625	36.4877	37.9544	30.7005	42.2722	40.4439	43.1557	37.4061	35.8095	40.039	39.933	40.2132	39.6203
32	A_30_P01029364	chr9:20313342-20323517_F	chr9:20313342-20323517_F	0.0344868	0.0151415	0.0206147	0.0388139	0.0447875	0.053424	0.0551576	0.0469323	0.0346251	0.0246316	0.033481	0.0393344
33	A_55_P2041509	1110004F10Rik	NM_019772	7.83753	8.48751	7.47067	7.17827	7.35104	7.80533	7.71645	7.42542	8.31167	7.59019	6.69952	7.38289
34	A_55_P1985294	Krtap5-5	NM_001037822	0.053166	0.0649255	0.0708498	0.0623312	0.0509732	0.0667091	0.0562653	0.0621004	0.0342255	0.0290527	0.042765	0.0412084
35	A_55_P2242690	D2Ertd127e	AK051746	0.0667063	0.0829201	0.0897603	0.0591971	0.0636985	0.0824928	0.0599032	0.0707871	0.0653434	0.0632059	0.068342	0.100869
36	A_30_P01029765	chr6:86425510-86450160_F	chr6:86425510-86450160_F	0.331406	0.270183	0.31065	0.233733	0.291351	0.309058	0.265971	0.280296	0.261319	0.219229	0.234583	0.261006
37	A_55_P2364211	2810428J06Rik	AK013182	0.0648025	0.102904	0.087225	0.108	0.108168	0.0934062	0.0673769	0.0859444	0.0801434	0.0714844	0.0795357	0.114984
38	A_55_P1975977	A_55_P1975977	A_55_P1975977	0.00809491	0.00770389	0.00751901	0.00726785	0.0104678	0.0106332	0.00954596	0.00866244	0.00862389	0.00793907	0.00894527	0.0104523
39	ERCC-00165_60	ERCC-00165_60	ERCC-00165_60	0.00806793	0.0188564	0.0074959	0.0325126	0.0104336	0.0377443	0.0205608	0.0095258	0.00859433	0.0185835	0.00891148	0.0104233
40	A_51_P358243	Tstd3	NM_029840	3.47525	3.48248	2.8123	3.85675	3.61228	3.79913	3.12502	2.93763	3.54059	4.1992	3.77068	3.77647
41	A_55_P2252586	3426406K10Rik	AK132212	0.132752	0.16206	0.172545	0.146553	0.170492	0.17264	0.191135	0.16567	0.114939	0.0997621	0.1108	0.126992
42	A_30_P01020720	chr16:32309935-32328234_R	chr16:32309935-32328234_R	6.28204	6.94983	6.55103	6.63517	6.50585	6.82907	6.65437	6.62123	7.07074	6.99025	6.93812	6.98015
43	A_55_P2153545	A_55_P2153545	A_55_P2153545	0.0156524	0.0138419	0.00739653	0.0194498	0.0102874	0.0213035	0.00938609	0.00851921	0.0353979	0.0235625	0.0224765	0.0273406
44	A_30_P01025927	chr1:6199946-6200603_R	chr1:6199946-6200603_R	0.0527938	0.0329458	0.0515239	0.0324973	0.0385747	0.0429838	0.0102121	0.032767	0.0746143	0.0256769	0.0642938	0.0419291
45	ERCC-00136_67	ERCC-00136_67	ERCC-00136_67	0.00788878	0.00752228	0.00734306	0.00712302	0.0102099	0.010335	0.00931762	0.00845562	0.00839718	0.00776244	0.00869773	0.0102444
46	A_55_P1999972	ENSMUST00000178429	ENSMUST00000178429	0.157828	0.166216	0.144364	0.149224	0.154895	0.183182	0.166178	0.211525	0.190731	0.143598	0.165358	0.16319
47	A_55_P2036031	Gm2675	AK035720	0.00782579	0.00746586	0.00728851	0.017095	0.0101302	0.0102474	0.00924828	0.00839471	0.0139808	0.00771003	0.00863079	0.0101844
48	A_55_P2073699	Bnip3l	NM_009761	4.28782	4.36345	4.37324	4.05525	4.34331	4.48323	4.19087	3.91213	4.56569	4.38507	4.3997	4.68739
49	A_51_P452153	Mzb1	NM_027222	0.0617316	0.0522727	0.0762367	0.0512573	0.0491839	0.121525	0.0706726	0.0686163	0.0446255	0.0469779	0.129088	0.0483963
50	A_52_P289213	Notch2	NM_010928	2.10579	1.81432	2.61218	1.89563	2.13522	1.97025	1.94271	1.87805	1.84032	2.14879	2.48043	2.01439
51	A_30_P01028667	chr13:53100475-53113850_R	chr13:53100475-53113850_R	0.423881	0.331321	0.320714	0.392771	0.432006	0.39821	0.393099	0.425091	0.27529	0.281378	0.318156	0.303689
52	A_30_P01026843	chr5:96591892-96606467_R	chr5:96591892-96606467_R	1.72215	1.68981	1.62587	1.50334	1.88183	1.6539	1.89688	1.87406	0.960765	0.841149	0.867362	1.11613
53	A_52_P117601	Defb19	NM_145157	0.00763072	0.00729168	0.00712223	0.00692701	0.00988836	0.00998855	0.00903857	0.00820381	0.00811814	0.0075463	0.00842281	0.0100079
54	A_30_P01026156	chr2:77655293-77657696_R	chr2:77655293-77657696_R	0.00759824	0.00726262	0.00848362	0.00690243	0.00984879	0.0238608	0.00900531	0.00817531	0.0167264	0.00751999	0.00839258	0.0164769
55	A_55_P2087013	Hipk1	NM_010432	0.164679	0.1156	0.192783	0.122192	0.135691	0.173301	0.117312	0.122927	0.155546	0.145214	0.128257	0.125792
56	A_30_P01021140	chr8:91471819-91551119_R	chr8:91471819-91551119_R	0.0254918	0.0145674	0.0227203	0.0246138	0.0149967	0.0167861	0.0196824	0.0225015	0.00801638	0.0109443	0.00832964	0.0099249
57	A_55_P2086143	Cyp39a1	NM_018887	4.04267	4.53132	4.78869	4.15923	4.0884	4.13064	4.66665	3.39264	4.33721	4.4672	5.04036	4.49167
58	A_30_P01022210	chr9:121207045-121269020_R	chr9:121207045-121269020_R	0.00747133	0.00714929	0.00698736	0.0068021	0.00969294	0.0119535	0.0197744	0.00805124	0.00795043	0.00741606	0.0162793	0.0098732
59	A_55_P2033932	Zzz3	NM_001080755	2.71945	2.82913	2.65249	3.05525	2.77453	2.68843	2.85607	2.60546	2.38173	2.85513	2.64441	2.04067
60	A_51_P111488	Gfod2	NM_027469	2.65413	2.35124	2.24702	2.81698	2.89527	2.66744	2.85268	2.88752	2.95735	2.89586	2.81724	2.96099
61	A_55_P2433218	Bloc1s6	NM_019788	3.81272	3.80045	3.43679	4.04655	3.77393	3.95425	3.54533	3.50824	3.82499	4.01656	3.96913	3.82815
62	A_30_P01030870	chr5:23363666-23371611_R	chr5:23363666-23371611_R	0.0233512	0.00785102	0.00688766	0.0067069	0.019919	0.0163836	0.00874855	0.0244203	0.00782574	0.00732033	0.00815619	0.0356094
63	A_55_P2157676	Wdr34	NM_001008498	111.87	108.424	107.828	101.513	107.09	113.571	105.064	111.792	111.069	102.636	109.447	119.03
64	A_55_P2069781	A_55_P2069781	A_55_P2069781	0.00729169	0.00698932	0.0137618	0.0144759	0.0106217	0.00956754	0.00869239	0.0108659	0.0101794	0.0073723	0.0133818	0.00973426
65	A_30_P01019449	chr10:120336296-120354471_R	chr10:120336296-120354471_R	0.00849668	0.0107667	0.0130401	0.00664001	0.0188288	0.0142439	0.00866423	0.00785873	0.00849831	0.00725323	0.00808318	0.00971343
66	A_55_P2137336	Mrfap1	NM_026242	0.33998	0.287549	0.337985	0.366999	0.343368	0.325824	0.341614	0.402905	0.420279	0.386757	0.411324	0.367783
67	A_55_P2279572	C79015	C79015	0.044822	0.0727902	0.0407983	0.0481697	0.0448652	0.0562704	0.0479131	0.0390594	0.0473921	0.0589941	0.0282716	0.0550925
68	A_30_P01023723	chr12:72103832-72116875_F	chr12:72103832-72116875_F	0.0132608	0.0214943	0.0118201	0.0176318	0.0107872	0.01856	0.0288566	0.00778803	0.0107638	0.0193757	0.00801646	0.0105202
69	A_30_P01033167	chr5:25168628-25185353_F	chr5:25168628-25185353_F	0.010098	0.0152659	0.00908268	0.00655817	0.0115126	0.012664	0.00856632	0.00776605	0.00763625	0.00717425	0.00799663	0.0133478
70	A_51_P168695	Mast4	NM_175171	0.444034	0.447087	0.532823	0.473261	0.524162	0.478388	0.542127	0.513011	0.527287	0.487769	0.455171	0.459549
71	A_30_P01027779	chr17:8719950-8783850_F	chr17:8719950-8783850_F	0.0628191	0.0671899	0.0629522	0.0484278	0.0379514	0.0431721	0.0439789	0.0569363	0.0381786	0.0474411	0.0412037	0.0276443
72	A_55_P2167530	Scube3	ENSMUST00000043503	0.103294	0.149167	0.122552	0.0855995	0.0934988	0.100179	0.172239	0.106965	0.087675	0.171754	0.0697861	0.0649823
73	A_30_P01024579	chr9:65368908-65377592_R	chr9:65368908-65377592_R	0.0194189	0.0142693	0.0212133	0.0168078	0.146466	0.0316397	0.00848316	0.0267207	0.0169459	0.00710879	0.00792896	0.00958114
74	A_52_P204689	Map4k2	NM_009006	0.997267	0.915321	0.903784	1.1826	1.28979	1.30499	1.09647	1.20295	1.0713	1.38152	1.33835	1.24918
75	A_55_P2218748	C77488	BG079202	0.171032	0.135901	0.131086	0.157782	0.204734	0.13746	0.19692	0.155567	0.0671215	0.0761087	0.0744888	0.0850559
76	A_55_P2143616	Ccdc108	ENSMUST00000130489	0.0609595	0.0620001	0.0674987	0.0707881	0.0765407	0.22671	0.0979739	0.0453739	0.0494207	0.0601614	0.0273422	0.0515447
77	ERCC-00158_78	ERCC-00158_78	ERCC-00158_78	0.00699094	0.00673172	0.00661353	0.00642788	0.0091283	0.00923216	0.00841743	0.00762146	0.00747311	0.0070555	0.0078787	0.00953923
78	A_30_P01031589	chr5:77239012-77271614_F	chr5:77239012-77271614_F	0.104571	0.147074	0.169416	0.126155	0.224129	0.0961409	0.129339	0.160882	0.142977	0.0864298	0.143394	0.0963027
79	A_30_P01033198	chr17:44503516-44504852_R	chr17:44503516-44504852_R	0.0349346	0.0416119	0.0299907	0.0250884	0.051735	0.0395127	0.0123165	0.0513658	0.0191866	0.0246232	0.0152248	0.0264859
80	A_52_P49014	Shh	NM_009170	0.473442	0.504935	0.536876	0.442751	0.405547	0.580161	0.584132	0.502358	0.504379	0.49897	0.590731	0.53774
81	A_55_P2110215	Ckap5	NM_001165989	23.255	26.5669	20.3283	28.9948	29.1922	27.4354	25.0482	24.8295	27.9722	29.1455	28.5358	30.8977
82	A_55_P2007205	ENSMUST00000063463	ENSMUST00000063463	0.344369	0.296422	0.463448	0.292911	0.421741	0.354797	0.258476	0.312823	0.280594	0.296386	0.343504	0.348739
83	A_51_P204740	Cd34	NM_133654	9.50606	9.46959	11.8845	14.6587	11.8367	9.59263	9.59513	14.0091	9.24225	10.1161	9.3582	9.74358
84	A_55_P1991585	Blvrb	NM_144923	4.71992	5.31855	5.10797	5.80231	5.15256	5.49899	5.16392	4.56423	5.31918	5.79633	5.15561	5.76252
85	A_55_P2158836	Toporsl	NM_026652	0.0068781	0.00664336	0.0083773	0.00694235	0.00901372	0.00913247	0.0510476	0.00754326	0.00737677	0.00698993	0.00783732	0.00950273
86	A_55_P2086797	Olfr462	NM_146411	0.00686744	0.00663665	0.0065452	0.00634116	0.0090038	0.00912621	0.00833796	0.00753721	0.00736864	0.00698554	0.00783764	0.00950289
87	A_55_P2170350	Klra22	NM_053152	0.112673	0.123079	0.16346	0.0835145	0.0989134	0.154125	0.12355	0.128698	0.125087	0.129127	0.143479	0.142278
88	A_30_P01021693	chr14:76912477-76931702_F	chr14:76912477-76931702_F	0.00685094	0.00662533	0.00654066	0.00680743	0.0144047	0.00911616	0.023646	0.00752949	0.00735769	0.00698228	0.00784029	0.00950656
89	ERCC-00042_60	ERCC-00042_60	ERCC-00042_60	0.00684367	0.017498	0.0126075	0.020742	0.0101832	0.0151732	0.0189899	0.0103977	0.0166907	0.00698161	0.00872965	0.00951205
90	A_51_P106952	Rbm26	NM_134077	1.93715	1.98708	1.98616	1.8681	1.8467	1.74935	1.68461	1.98006	1.86062	1.8222	1.82129	1.69923
91	A_30_P01024335	chr16:59557120-59602070_F	chr16:59557120-59602070_F	0.00683291	0.00661552	0.0109654	0.0110594	0.0151491	0.0131337	0.00833637	0.00752654	0.0130369	0.0129718	0.00785476	0.00952009
92	A_55_P2335045	LOC102639676	XR_383856	0.0373687	0.010136	0.0250711	0.0269775	0.016689	0.0541284	0.0195372	0.0404521	0.0271947	0.0405319	0.0126697	0.0382889
93	A_30_P01029862	chr5:120269342-120279542_R	chr5:120269342-120279542_R	0.00682557	0.0066129	0.00654446	0.00632282	0.00897786	0.00911365	0.0423232	0.0112196	0.00734599	0.00698554	0.00787024	0.0095345
94	A_30_P01027625	chr8:113968152-113973727_F	chr8:113968152-113973727_F	0.00682327	0.00661306	0.00654931	0.0071969	0.0089784	0.00911643	0.00835016	0.00753322	0.00734628	0.0188785	0.017305	0.00954406
95	ERCC-00002_129	ERCC-00002_129	ERCC-00002_129	0.00682125	0.0247723	0.0277901	0.0198629	0.0165464	0.0202281	0.0113112	0.0361323	0.00734852	0.00979345	0.0181762	0.0149834
96	A_52_P604735	Fbxl2	ENSMUST00000117537	0.323141	0.353921	0.271435	0.304271	0.33015	0.396307	0.298717	0.305319	0.40728	0.325257	0.331075	0.314015
97	A_30_P01020302	chr12:110944403-110988678_R	chr12:110944403-110988678_R	0.0337211	0.0165255	0.0388602	0.0360979	0.0509208	0.0300657	0.0276131	0.0431251	0.0324383	0.0268392	0.0168974	0.00957409
98	A_55_P2083725	A_55_P2083725	A_55_P2083725	0.0583895	0.0776881	0.0805178	0.0651544	0.0835721	0.0634001	0.0827677	0.0743431	0.0531648	0.0417473	0.0355925	0.043408
99	A_30_P01023984	chr18:32389815-32392082_F	chr18:32389815-32392082_F	1.94512	2.00063	2.0572	1.866	1.84827	2.03461	1.89657	2.07541	1.93113	1.76597	1.76383	2.0247
100	A_55_P2184108	Gm10589	AK138846	0.00682914	0.00663166	0.0164272	0.00966378	0.00901074	0.0213658	0.106549	0.00757073	0.0253617	0.00702279	0.0120724	0.00961305
101	A_55_P1958097	Eno1	NM_023119	74.3279	72.9423	69.0892	75.6767	68.0468	68.1002	68.8408	71.5523	75.7126	75.2512	63.3631	71.3364
102	A_55_P1962224	Afap1l2	NM_146102	2.79845	2.8064	3.67634	2.3036	2.99169	2.21931	3.05564	3.03446	2.82897	2.74514	3.21363	2.59119
103	A_30_P01018954	chr11:97457180-97487074_R	chr11:97457180-97487074_R	0.00684252	0.00665159	0.00662096	0.00636524	0.00904225	0.0321758	0.011826	0.00760284	0.00739511	0.0137193	0.00800757	0.00966021
104	A_55_P1952434	Tm2d1	NM_053157	7.84028	8.05905	6.90281	8.60451	8.7414	8.35375	8.36305	7.6481	9.06566	8.65753	8.31342	9.19025
105	A_55_P1955242	NAP114395-1	NAP114395-1	126.918	132.43	145.771	128.748	118.538	124.295	134.423	120.653	139.508	139.455	134.627	147.45
106	A_55_P1985950	Xpnpep2	NM_001289729	0.256451	0.226968	0.237583	0.286274	0.190937	0.194684	0.197712	0.257528	0.209844	0.223423	0.239965	0.162584
107	A_55_P2011091	A_55_P2011091	A_55_P2011091	0.15756	0.221558	0.140875	0.160069	0.238983	0.187553	0.215422	0.153787	0.15295	0.213941	0.195848	0.222449
108	A_55_P2186085	Atp11c	NM_001037863	1.28495	1.32093	1.44856	1.53391	1.41035	1.53052	1.48044	1.42408	1.32938	1.47468	1.41852	1.1249
109	A_30_P01032907	chr5:106353430-106353843_F	chr5:106353430-106353843_F	0.0243813	0.012796	0.0393756	0.00850614	0.0182468	0.010476	0.025451	0.0134284	0.0264011	0.010801	0.0112191	0.00977504
110	A_30_P01029867	chr2:104398943-104412968_F	chr2:104398943-104412968_F	0.00690542	0.00672114	0.00672026	0.0114096	0.00914666	0.00931692	0.0120243	0.00797968	0.0127462	0.00712777	0.00815317	0.0097962
111	A_55_P2046852	Gata1	NM_008089	0.0336279	0.0986474	0.035794	0.0377666	0.0351367	0.175795	0.041813	0.0338689	0.0521999	0.117846	0.372979	0.101158
112	A_55_P1965358	9430091E24Rik	AK080922	0.333217	0.293412	0.336519	0.31954	0.402703	0.316053	0.24239	0.356272	0.341047	0.269753	0.42435	0.443272
113	A_55_P2108825	A_55_P2108825	A_55_P2108825	0.00694191	0.00675946	0.00677178	0.00647787	0.00920726	0.00938009	0.00865684	0.00775903	0.00752109	0.00717037	0.0082735	0.00986341
114	A_52_P95577	Skint2	NM_001285963	0.00695546	0.00677245	0.00679121	0.00649198	0.00922821	0.00940289	0.00868173	0.00777809	0.00753428	0.00718444	0.00825094	0.0098852
115	A_30_P01021023	chr17:88890039-88905680_F	chr17:88890039-88905680_F	0.0079411	0.00678572	0.00680814	0.00650622	0.149488	0.0094247	0.00870705	0.00779751	0.0075526	0.00719904	0.00827309	0.00991059
116	A_66_P114577	Olfr616	NM_147099	0.0125819	0.016772	0.00682679	0.00804895	0.00927184	0.0343141	0.00873343	0.0129298	0.00756575	0.0242868	0.0082988	0.00993432
117	A_55_P2176989	Stx8	NM_018768	0.0241241	0.0253242	0.0250878	0.0261065	0.0100876	0.0374142	0.023663	0.0172661	0.042778	0.027752	0.0173927	0.00996111
118	A_30_P01025937	chr16:50715231-50841124_F	chr16:50715231-50841124_F	0.0260349	0.0407426	0.0155698	0.0289281	0.0105197	0.0429664	0.0131216	0.0272073	0.0269769	0.0157457	0.0125176	0.00998315
119	A_55_P1955078	Igflr1	NM_145580	2.37045	1.74271	2.73413	2.46485	2.77443	2.40958	2.19305	2.24635	2.27636	2.00723	3.36057	2.28097
120	ERCC-00018_67	ERCC-00018_67	ERCC-00018_67	0.060834	0.054466	0.0829013	0.06825	0.0727086	0.0949537	0.114573	0.0822707	0.0927145	0.0567369	0.0761645	0.132391
121	A_52_P438082	Cebpg	NM_009884	0.829183	0.751555	0.72714	0.596081	0.770079	0.667316	0.663931	0.733523	0.702296	0.728481	0.649019	0.679772
122	A_66_P114169	Gm7904	NR_003372	0.0803229	0.0820043	0.075738	0.0725933	0.0877183	0.0954576	0.051416	0.0865251	0.0603388	0.0337997	0.0751394	0.0320904
123	A_55_P1957613	Ak2	NM_016895	5.31327	6.27513	6.41876	5.6575	5.77686	5.7095	5.687	5.99871	6.25236	5.72885	5.79104	4.85837
124	A_55_P2109347	Dot1l	ENSMUST00000149394	0.160327	0.121012	0.127901	0.14711	0.157874	0.142658	0.113225	0.153357	0.119486	0.109836	0.126178	0.102892
125	A_30_P01018787	chr14:65720392-65769859_R	chr14:65720392-65769859_R	0.0371273	0.0398691	0.0412436	0.0417738	0.0338087	0.0619919	0.0200341	0.0437806	0.0482306	0.0425534	0.0366957	0.0368914
126	A_30_P01030780	chr7:91300649-91302183_F	chr7:91300649-91302183_F	0.030903	0.01224	0.0162222	0.0213248	0.0249638	0.0131581	0.0254043	0.040004	0.0277804	0.029854	0.0210917	0.0313813
127	A_30_P01018803	chr13:74743335-74754728_R	chr13:74743335-74754728_R	0.099486	0.108574	0.0967812	0.108264	0.116235	0.109512	0.11644	0.0944931	0.110135	0.104886	0.122303	0.110118
128	A_30_P01018668	chr11:119794849-119803349_R	chr11:119794849-119803349_R	0.0742271	0.0715835	0.0788466	0.0889815	0.09813	0.108439	0.117883	0.07127	0.0650116	0.0671732	0.069761	0.0449376
129	A_55_P2111292	3110009E18Rik	NM_001172074	0.83084	0.915541	0.932584	0.996349	0.8816	0.823743	0.944858	0.917587	0.925322	0.892953	0.927104	0.940755
130	A_55_P2084601	A_55_P2084601	A_55_P2084601	0.0158875	0.0146468	0.0123473	0.0119285	0.0189468	0.026075	0.00912139	0.0225716	0.00779487	0.00870261	0.00980967	0.0102754
131	A_55_P1956687	Rab37	NM_001163753	6.64028	6.00139	5.33833	8.56458	8.58029	9.35543	6.88807	6.5993	6.4432	9.3715	9.57632	10.5659
132	A_51_P104681	Krtap6-5	NM_130856	0.00850924	0.00702976	0.00712805	0.00944099	0.00964144	0.00982504	0.00917218	0.00874664	0.00782084	0.00740944	0.00866813	0.0103147
133	A_55_P2124736	Col14a1	NM_181277	1.80353	1.79347	2.31137	1.59179	1.84103	1.20311	1.7899	1.88717	1.44253	1.39311	1.99849	1.49003
134	A_52_P180335	Mrpl28	NM_024227	4.56354	4.55713	4.08992	4.07465	4.18681	4.31419	4.25015	4.33151	4.20151	4.70732	4.102	4.97303
135	A_55_P2051429	A_55_P2051429	A_55_P2051429	0.661556	0.624416	0.605277	0.69839	0.722916	0.687866	0.705498	0.648412	0.572946	0.497165	0.514284	0.659158
136	A_51_P101765	Smarcd1	NM_031842	0.126732	0.116398	0.128293	0.153307	0.119788	0.140232	0.113014	0.146741	0.135426	0.142835	0.121037	0.112188
137	A_52_P222230	AK040896	AK040896	2.89811	3.29996	2.60118	3.98788	2.65677	3.18245	1.52766	5.59956	1.76534	2.55391	3.14542	2.9236
138	A_51_P483576	AF138742	AF138742	0.11681	0.222642	0.152303	0.0973314	0.127541	0.405329	0.206823	0.163208	0.518035	0.322492	0.821915	0.306091
139	A_55_P2372228	A430104N18Rik	DT902180	0.0802774	0.0780072	0.236862	0.134035	0.0564777	0.169211	0.0963365	0.158914	0.170363	0.219608	0.524617	0.142336
140	A_51_P436201	Gart	NM_010256	0.718448	0.711035	0.577533	0.70801	0.607977	0.656286	0.638348	0.529879	0.644703	0.710379	0.533449	0.674513
141	A_51_P108228	Chrna7	NM_007390	0.252201	0.203895	0.148788	0.270658	0.2768	0.284008	0.211442	0.24589	0.252034	0.288097	0.267051	0.393058
142	A_66_P122433	Fam228a	NM_029107	0.0272317	0.0436311	0.0500358	0.03722	0.140297	0.0563481	0.0297012	0.0396469	0.0414215	0.0430309	0.0313999	0.0393619
143	A_55_P2055055	4930547M16Rik	AK166420	0.00848977	0.00709032	0.0287449	0.0198443	0.00979361	0.0136079	0.00938928	0.0163133	0.0293431	0.0294827	0.00875193	0.0125589
144	A_30_P01023752	chr10:120116843-120182671_F	chr10:120116843-120182671_F	0.0161167	0.00906122	0.0342164	0.0190658	0.00979739	0.0371713	0.019976	0.030277	0.0171272	0.0224311	0.00874605	0.0104794
145	A_51_P104897	Itpr3	NM_080553	26.2206	24.5306	27.6685	25.0478	23.8396	23.0941	26.5183	26.7367	25.1654	22.8028	29.5559	22.6927
146	A_55_P2040490	A_55_P2040490	A_55_P2040490	1.13557	1.12988	1.04918	0.99738	1.2599	1.25849	1.35541	1.13617	1.2193	1.18797	1.20046	1.41628
147	A_55_P2253348	Galnt7	NM_001167981	3.90449	3.46814	3.52395	3.05196	3.5293	3.94139	3.94204	3.93188	3.60374	3.5609	3.61158	4.21249
148	A_55_P2007377	Elf2	NM_023502	1.15015	1.32497	1.39258	1.15777	1.33357	1.26392	1.22182	1.37462	1.09147	1.14868	1.29881	1.19937
149	A_55_P2110250	Rd3l	NM_001127685	0.0074249	0.0078768	0.0185775	0.0254446	0.00978038	0.0202021	0.0134991	0.017692	0.026589	0.00730206	0.00867394	0.0104713
150	A_51_P330428	Eif4ebp1	NM_007918	1.5795	1.76783	1.96424	1.49287	1.41057	1.43015	1.45194	1.3892	1.45552	1.48867	1.30806	1.15368
151	A_55_P2419171	A_55_P2419171	A_55_P2419171	0.00742266	0.00701342	0.0071805	0.0068323	0.00975446	0.00991307	0.00940583	0.00825243	0.00923744	0.00724453	0.0086237	0.0104507
152	A_55_P2124923	Gm10436	NM_001105254	0.00741779	0.00845114	0.0166578	0.0133591	0.00974053	0.0104325	0.0131854	0.00823572	0.00891099	0.0194408	0.00859742	0.010439
153	A_66_P109673	Sh2b3	ENSMUST00000136960	0.814515	0.901335	0.956812	0.850028	0.882027	0.847604	0.774471	0.641663	0.735963	0.837226	0.93505	0.660911
154	A_55_P2008896	NAP114945-1	NAP114945-1	3.39333	3.82787	3.66816	3.23171	3.16564	3.24667	3.21581	3.09626	3.36416	3.20781	3.49356	3.20728
155	A_30_P01030312	chrX:98989930-98994344_F	chrX:98989930-98994344_F	0.0073876	0.00691946	0.00709049	0.00815492	0.0122536	0.00981006	0.0093468	0.00817433	0.00764113	0.00710547	0.00847487	0.0103803
156	A_55_P2232410	AI195470	AA985897	0.00737399	0.00688954	0.00706259	0.00777936	0.00963286	0.00977578	0.00932379	0.00814756	0.00760293	0.007062	0.008428	0.0103543
157	A_30_P01027288	chr15:12126433-12126745_R	chr15:12126433-12126745_R	0.00947786	0.015146	0.0194351	0.00804257	0.00959812	0.0115161	0.0110439	0.0197498	0.00756245	0.0158516	0.00837683	0.0103247
158	A_51_P397876	En2	NM_010134	0.180651	0.220678	0.161239	0.165724	0.154103	0.193222	0.190307	0.232867	0.143189	0.123461	0.117272	0.173693
159	A_30_P01022060	chr15:73227424-73257474_F	chr15:73227424-73257474_F	0.00731772	0.00678184	0.00695782	0.0277991	0.00951538	0.0198071	0.00923269	0.0080487	0.00746999	0.0149741	0.00826281	0.0212181
160	A_55_P2117579	Ppih	NM_001110129	0.213499	0.272217	0.181817	0.23491	0.253602	0.277273	0.240922	0.209407	0.275997	0.261269	0.251568	0.230503
161	A_51_P156800	Mob2	NM_028308	3.84799	3.38249	3.43576	4.17422	3.81078	4.07072	4.03721	3.9397	3.81147	4.36402	4.08876	4.47099
162	DarkCorner	DarkCorner	DarkCorner	0.00723734	0.00664689	0.00681992	0.00654529	0.00936361	0.00948701	0.00910509	0.00791792	0.00730354	0.00673745	0.00806648	0.0101246
163	GE_BrightCorner	GE_BrightCorner	GE_BrightCorner	52.5342	41.6954	45.2599	43.1229	45.0384	45.7889	48.0575	45.6806	46.7416	43.5322	45.2615	47.1777
164	GE_BrightCorner	GE_BrightCorner	GE_BrightCorner	49.6769	42.3398	44.1567	41.924	43.5815	45.379	47.6859	46.3763	45.0641	43.5201	45.6331	46.0204
165	GE_BrightCorner	GE_BrightCorner	GE_BrightCorner	54.7938	42.8435	42.427	42.4435	46.7392	48.6151	45.4608	48.5934	49.7728	47.1443	47.5468	49.4046
166	DarkCorner	DarkCorner	DarkCorner	0.00759642	0.00709109	0.00692831	0.0064687	0.00981061	0.0105375	0.00904875	0.00814766	0.0100488	0.00745299	0.00882142	0.0104754
167	A_30_P01023440	chr2:128217275-128217972_R	chr2:128217275-128217972_R	0.00767738	0.0366998	0.0254444	0.0400372	0.0308847	0.0337997	0.037302	0.0127412	0.036922	0.0179042	0.0408171	0.0105223
168	A_55_P2117741	Nck2	NM_010879	1.78548	1.55075	2.36777	1.52855	1.35926	1.48865	1.86327	1.80914	1.59855	1.51166	1.58461	1.20916
169	A_66_P135885	Olfr671	NM_001011755	0.0603599	0.0409493	0.0466493	0.0411303	0.0601816	0.127408	0.0553258	0.0633698	0.0301268	0.0368167	0.0148138	0.0106113
170	A_30_P01030160	chr17:15226181-15250333_F	chr17:15226181-15250333_F	0.00787991	0.00737161	0.00897822	0.00676195	0.0101638	0.0437972	0.0093454	0.00843014	0.00844678	0.0129901	0.00905944	0.0106474
171	A_30_P01021134	chr7:119735208-119822808_F	chr7:119735208-119822808_F	0.00792962	0.00743304	0.0072636	0.00682527	0.0102373	0.0108551	0.00940895	0.00849232	0.00850496	0.00776322	0.00910755	0.0106783
172	A_55_P2145706	Thoc7	NM_001285780	1.64932	1.78059	1.41264	1.45337	2.02366	1.96997	1.76449	1.51619	2.16734	1.84805	2.14488	1.67638
173	A_55_P2049949	A_55_P2049949	A_55_P2049949	1.1461	0.913014	0.937067	0.90527	1.04469	1.09274	0.977908	0.997525	0.926911	0.90041	0.871744	0.889816
174	A_51_P327657	Ifi44l	NM_031367	0.00807544	0.033039	0.00741706	0.0200545	0.0585474	0.0109838	0.015936	0.00864379	0.014605	0.011824	0.00922166	0.01076
175	A_55_P2354675	1700011B04Rik	AK156032	0.00811695	0.00763219	0.00745992	0.0181024	0.0977515	0.017152	0.00961584	0.0105084	0.0236616	0.0147156	0.00925097	0.0130949
176	A_55_P2045765	Rnf224	NM_001033410	0.494554	0.391392	0.369486	0.43196	0.48506	0.505884	0.420772	0.430816	0.393234	0.588271	0.465347	0.454422
177	A_55_P2170881	Arhgap26	NM_175164	0.221296	0.228634	0.150603	0.236258	0.297751	0.221469	0.278174	0.251982	0.291561	0.238924	0.242866	0.286068
178	A_30_P01021553	chrX:6988942-6998206_R	chrX:6988942-6998206_R	0.00821658	0.00774261	0.00756554	0.00716931	0.0106147	0.0110884	0.00971658	0.00878829	0.00880231	0.00803789	0.00931509	0.0108201
179	A_55_P1969560	A_55_P1969560	A_55_P1969560	0.00824353	0.00777175	0.00759109	0.00720033	0.0106483	0.0111033	0.00974637	0.008813	0.00883035	0.00806306	0.00932862	0.0108272
180	A_55_P2035789	A_55_P2035789	A_55_P2035789	0.00826467	0.00779766	0.00761951	0.00723572	0.0106777	0.0111139	0.00977123	0.00883759	0.00885232	0.00808424	0.00933874	0.0108335
181	A_30_P01022993	chr17:71202950-71229883_F	chr17:71202950-71229883_F	0.0614075	0.0461447	0.0647418	0.0522374	0.0331231	0.0499559	0.209219	0.0665525	0.0306715	0.0228064	0.0122104	0.0108354
182	A_30_P01021899	chr8:122788975-122789224_R	chr8:122788975-122789224_R	0.0465698	0.0304806	0.0443566	0.0426412	0.0341148	0.026433	0.0776935	0.0699693	0.0362154	0.0314173	0.0415673	0.0244719
183	A_51_P195506	Csf1	NM_007778	3.10165	3.40076	4.09272	1.45846	1.56097	1.60945	2.8023	2.55752	2.32414	1.22393	1.24251	1.0901
184	A_52_P259817	Upp2	NM_029692	0.0951513	0.102286	0.0789534	0.0877007	0.0496805	0.0756383	0.0535677	0.0729274	0.0592716	0.0524978	0.084409	0.109455
185	A_30_P01017751	chr4:57372663-57377164_R	chr4:57372663-57377164_R	0.365367	0.447803	0.29802	0.296565	0.375952	0.324742	0.405503	0.379057	0.336698	0.306655	0.26828	0.25898
186	A_30_P01018616	chr4:40202350-40205120_R	chr4:40202350-40205120_R	0.398164	0.38823	0.517366	0.354489	0.477222	0.557468	0.290205	0.478108	0.449916	0.277993	0.474669	0.429752
187	A_55_P2172375	A_55_P2172375	A_55_P2172375	0.381056	0.400994	0.35231	0.399336	0.485606	0.433587	0.417516	0.437599	0.427377	0.397006	0.40168	0.408828
188	A_30_P01022097	chr6:35441848-35450830_F	chr6:35441848-35450830_F	0.00833038	0.00789117	0.0121761	0.00842422	0.181706	0.0110721	0.0105017	0.0124978	0.0231758	0.00814902	0.00930925	0.010785
189	A_55_P2002165	Sumo3	NM_019929	0.296011	0.217412	0.257936	0.304829	0.30305	0.234631	0.285098	0.22084	0.248277	0.296636	0.287446	0.207599
190	A_30_P01029814	chr12:110909258-110913909_F	chr12:110909258-110913909_F	0.351949	0.372757	0.372489	0.385676	0.29619	0.396312	0.445159	0.346424	0.37286	0.36611	0.338019	0.37895
191	A_55_P2138071	A_55_P2138071	A_55_P2138071	4.77085	4.99542	4.486	4.38104	4.76354	4.68787	4.56698	4.0634	4.81205	5.09713	4.63099	4.57141
192	A_51_P126337	Fgf12	NM_183064	18.5818	19.5296	13.6366	22.1376	21.7973	21.182	19.6115	17.3262	21.7965	20.9308	19.7484	22.0226
193	A_55_P2165120	Cblb	NM_001033238	0.108374	0.116393	0.142154	0.136914	0.18019	0.118286	0.15202	0.106701	0.097732	0.074871	0.0906653	0.0604001
194	A_55_P2006255	Txnip	NM_001009935	0.609466	0.639419	0.712545	0.598798	0.623544	0.669817	0.600241	0.530428	0.442414	0.679544	0.576849	0.432988
195	ERCC-00009_60	ERCC-00009_60	ERCC-00009_60	0.00825419	0.0143886	0.00891607	0.0123048	0.0632496	0.0108902	0.00973191	0.00882284	0.0144065	0.00868916	0.00915994	0.0106468
196	A_55_P2087607	Cp	NM_001276248	0.279012	0.247857	0.368228	0.24355	0.197405	0.193742	0.192723	0.267321	0.158748	0.182256	0.209246	0.169824
197	A_30_P01026850	chr3:86827945-86886695_R	chr3:86827945-86886695_R	0.0190334	0.0116789	0.0307832	0.0372778	0.0152844	0.0108211	0.0116797	0.0172043	0.0143691	0.0127511	0.00910236	0.0181448
198	ERCC-00051_60	ERCC-00051_60	ERCC-00051_60	0.00819272	0.00778866	0.00760456	0.00733844	0.0588239	0.0174998	0.00966111	0.00876039	0.00873784	0.00803437	0.00906864	0.0105705
199	A_30_P01020040	chr8:119732348-119749198_R	chr8:119732348-119749198_R	0.0757751	0.0526972	0.0512097	0.0414308	0.0657235	0.0620608	0.060034	0.0611413	0.0528283	0.03827	0.0440838	0.0444985
200	A_52_P142208	Akirin1	NM_023423	8.25563	8.22021	7.36726	8.00704	8.17767	8.38675	8.17216	7.72433	8.6663	7.96527	7.97799	7.92312
201	A_51_P124254	Col4a1	NM_009931	3.27986	3.31035	4.27163	2.92278	3.07722	2.42017	3.10666	3.56702	3.06667	3.19426	4.42643	2.99677
202	A_55_P1975445	A_55_P1975445	A_55_P1975445	10.6242	11.3014	10.0826	10.282	9.93056	10.4614	10.2849	9.26833	10.8657	11.9914	9.48892	10.7327
203	A_30_P01033257	chr13:71021825-71023381_F	chr13:71021825-71023381_F	0.00806625	0.0076781	0.00749715	0.00725592	0.0104332	0.0105845	0.00951537	0.00863182	0.00859332	0.00792112	0.00890815	0.0104266
204	A_55_P1971448	Snrpd1	NM_009226	12.5049	13.0029	12.7328	13.7793	12.6083	12.5909	12.9775	12.6634	14.0255	13.9884	13.8431	13.4087
205	A_51_P130095	Fcgr2b	NM_001077189	0.147835	0.175514	0.18953	0.17747	0.125329	0.136405	0.170065	0.0851557	0.150393	0.138632	0.141726	0.0835372
206	A_55_P2022622	Gm6943	XR_381330	0.273185	0.289105	0.315334	0.261356	0.255877	0.264908	0.599128	0.302303	0.297491	0.2552	0.185196	0.201786
207	A_55_P2123012	AA667203	AK153754	0.11629	0.110514	0.139791	0.13705	0.137937	0.163112	0.131197	0.127285	0.143564	0.112951	0.11856	0.160628
208	A_52_P501049	ENSMUST00000071374	ENSMUST00000071374	1.15502	1.04197	1.06431	1.22252	1.03376	1.07127	1.01431	1.06447	1.01938	0.900569	1.0455	1.09575
209	ERCC-00018_67	ERCC-00018_67	ERCC-00018_67	0.105199	0.0727494	0.110812	0.0641301	0.0425544	0.0793487	0.0921133	0.0858465	0.116619	0.0815445	0.103244	0.0922677
210	(+)E1A_r60_a22	E1A_r60_a22	E1A_r60_a22	2.61306	2.70955	2.50164	2.43633	2.39272	2.3215	2.53876	2.92387	2.97097	2.54046	2.61763	3.62043
211	A_55_P2183672	Pebp1	NM_018858	293.967	281.565	268.649	262.995	279.598	292.936	293.932	296.396	307.729	283.745	300.481	336.678
212	A_66_P129769	Sik2	NM_178710	0.0826433	0.114662	0.152118	0.0851575	0.085151	0.0722375	0.109467	0.105042	0.0948002	0.0519053	0.0959843	0.0696536
213	A_55_P2100830	Sprtn	NM_001111141	0.328172	0.220869	0.223575	0.226997	0.233118	0.241453	0.238141	0.220983	0.277037	0.209466	0.239742	0.268536
214	A_30_P01030309	chr2:79521628-79521871_F	chr2:79521628-79521871_F	0.00772286	0.00737198	0.00720182	0.00700133	0.0100032	0.010105	0.00913737	0.00829073	0.00821735	0.00762854	0.00852095	0.0121827
215	A_30_P01018792	chr3:40966969-40976585_R	chr3:40966969-40976585_R	0.0166116	0.00975959	0.024897	0.0319513	0.0203599	0.0223993	0.00910255	0.026179	0.0151566	0.00827235	0.00848691	0.0106013
216	A_52_P588771	Ntn5	NM_001033356	0.202096	0.168362	0.225453	0.166317	0.113304	0.170103	0.185712	0.172887	0.184895	0.107567	0.144884	0.162734
217	A_30_P01030301	chr7:119735208-119822808_F	chr7:119735208-119822808_F	0.242584	0.320556	0.254746	0.321905	0.0687385	0.266739	0.408992	0.270296	0.358029	0.368648	0.266902	0.384466
218	A_55_P2008996	Gm10034	AK164250	0.0673148	0.0857444	0.065134	0.0651809	0.0688969	0.196567	0.0868431	0.0768898	0.0685906	0.0405359	0.0518188	0.0664076
219	A_52_P6451	Sec24a	NM_175255	0.609894	0.629916	0.6789	0.658525	0.683378	0.674429	0.601011	0.653287	0.642236	0.603009	0.617402	0.651734
220	A_30_P01024162	chr9:78373792-78374303_R	chr9:78373792-78374303_R	0.00752845	0.00719804	0.00703636	0.00684934	0.00976334	0.00985388	0.00893141	0.00810252	0.00801179	0.00746216	0.00832437	0.00992389
221	A_55_P2154480	Ctxn2	NM_001162934	0.479192	0.551946	0.902774	0.662312	0.757571	0.551619	0.60189	0.66436	0.647955	0.683893	0.724335	0.592468
222	A_55_P2140328	A_55_P2140328	A_55_P2140328	22.3429	24.0287	20.7211	25.5589	26.7293	24.991	25.9791	23.982	27.9872	25.8969	24.6947	28.9608
223	A_55_P2110532	4930578E11Rik	NR_045391	0.00743492	0.00711444	0.00695862	0.00677511	0.00964953	0.00973748	0.00883449	0.00801382	0.0079144	0.00739203	0.00823472	0.00984736
224	A_30_P01026277	chr2:35828611-35838083_F	chr2:35828611-35838083_F	0.242731	0.216782	0.257073	0.281346	0.282366	0.255968	0.248988	0.308855	0.209084	0.21491	0.228032	0.226974
225	A_52_P306236	Epha7	NM_001122889	0.0527534	0.0469076	0.0610958	0.0724245	0.0830192	0.0702573	0.0706465	0.0286134	0.0341442	0.101862	0.0702095	0.0853223
226	A_30_P01029410	chr1:42689799-42749799_R	chr1:42689799-42749799_R	0.00734564	0.00703548	0.0156404	0.00670464	0.0133461	0.0129236	0.015411	0.00803652	0.0145898	0.00923536	0.00815301	0.0145987
227	A_55_P2383283	2310001H17Rik	AK036632	0.00731656	0.00700985	0.0429004	0.036957	0.222604	0.00959428	0.00871543	0.0338768	0.00923473	0.0600995	0.00812739	0.00975404
228	A_55_P2188624	4933409D19Rik	AK016750	0.00728873	0.00698502	0.00683891	0.00665993	0.00947332	0.00956086	0.00868761	0.00787764	0.00776489	0.00727563	0.00810311	0.00973262
229	A_55_P2087518	Exoc8	NM_198103	0.38556	0.330346	0.323273	0.404502	0.35558	0.341419	0.367118	0.382839	0.376261	0.346693	0.411849	0.405018
230	A_55_P1970954	Pknox2	NM_001029838	3.81587	3.89045	2.85714	4.6668	4.46972	4.45384	3.9616	3.47835	4.36475	4.62115	4.89665	4.67421
231	A_52_P329398	Atp12a	NM_138652	0.0453866	0.0495137	0.0635561	0.0513476	0.0638052	0.0593009	0.038572	0.0665911	0.0388759	0.0412989	0.0371644	0.0309562
232	A_55_P2328787	6030451C04Rik	AK080477	1.5497	1.31263	1.36686	1.5054	1.05608	1.16466	1.39045	1.37051	1.70999	1.25724	1.15158	1.46524
233	A_66_P120567	Anxa1	NM_010730	2.33588	1.94008	1.25901	0.654108	0.917743	1.31799	1.8697	1.36846	0.87719	1.01661	1.45944	0.537428
234	A_55_P2038640	Gcn1l1	NM_172719	1.41156	1.30563	1.3553	1.54824	1.32638	1.56831	1.68129	1.42661	1.45044	1.6414	1.62748	1.57101
235	A_55_P2091831	Krtap1-4	NM_001039502	0.071686	0.0836619	0.0848847	0.0789004	0.0848119	0.114809	0.0861471	0.101915	0.0662854	0.0345903	0.0509581	0.0634813
236	A_51_P100298	Stx3	NM_152220	0.0738917	0.0631878	0.0797477	0.0785753	0.183807	0.0984929	0.0572728	0.0670642	0.0574261	0.0619364	0.0658267	0.0606873
237	A_55_P2255399	F630048H11Rik	AK170335	0.437475	0.392287	0.442711	0.269228	0.478529	0.387522	0.33689	0.368197	0.367234	0.331982	0.358898	0.375282
238	A_55_P2173952	Myh6	NM_001164171	0.0573465	0.0625749	0.0631325	0.0691116	0.0578854	0.0627669	0.0735625	0.0834588	0.0356187	0.047545	0.0474853	0.0446716
239	A_30_P01021519	chr4:132897264-132910714_F	chr4:132897264-132910714_F	0.111701	0.13538	0.125607	0.124618	0.133744	0.216431	0.185965	0.139126	0.0684415	0.0702401	0.0791987	0.0916689
240	A_51_P113906	Gkn2	NM_025467	0.00700945	0.0067453	0.00662776	0.00756042	0.0148919	0.110139	0.0138986	0.00763431	0.00881307	0.00707244	0.00789415	0.0121495
241	A_55_P2032024	Uggt2	NM_001081252	0.291366	0.258418	0.28972	0.263256	0.302264	0.260114	0.279007	0.291188	0.242752	0.228668	0.241158	0.249319
242	A_51_P401386	ENSMUST00000177929	ENSMUST00000177929	0.00697497	0.00671702	0.00660481	0.00641714	0.0091121	0.0109754	0.00840439	0.00760721	0.0074618	0.00705026	0.0078756	0.00953455
243	A_51_P116088	Rexo2	NM_024233	8.60155	7.91984	6.52213	7.46948	7.51634	7.27417	8.76019	8.50706	7.80128	7.81611	7.78098	8.22074
244	A_30_P01028923	chr16:4867322-4874772_F	chr16:4867322-4874772_F	0.0186479	0.0172899	0.0356434	0.022698	0.0169405	0.0130404	0.0346706	0.0215164	0.0376275	0.0106351	0.0256304	0.0279878
245	A_51_P114634	Amz1	NM_173405	0.849769	0.800649	0.925708	0.762768	0.589096	0.656746	0.687252	0.75035	0.738936	0.644689	0.490124	0.506464
246	A_51_P122238	Uchl5	NM_019562	8.59082	8.48375	6.8013	6.94636	8.57325	7.31347	8.06281	7.77081	7.75882	8.25095	7.82065	9.52833
247	A_51_P114616	Batf	NM_016767	0.0343541	0.0864668	0.0777253	0.0485199	0.0580946	0.079698	0.0346179	0.0601456	0.0391154	0.025286	0.0410749	0.0325852
248	A_52_P120122	ENSMUST00000176382	ENSMUST00000176382	0.00689328	0.00665345	0.00655856	0.00635968	0.00902905	0.14704	0.139899	0.00755058	0.00739257	0.0070047	0.00784777	0.00951032
249	A_51_P474658	Esr1	NM_007956	0.0130072	0.0135999	0.00863497	0.0216807	0.0090192	0.0219889	0.145431	0.0208353	0.00949581	0.0290706	0.0249974	0.0356616
250	A_55_P2185676	Ssty1	NM_009220	0.00687403	0.00663954	0.00655116	0.00634709	0.00901116	0.00913005	0.00834324	0.00754004	0.00737802	0.0069976	0.00784783	0.00951128
251	A_30_P01024186	chr15:82769917-82770296_R	chr15:82769917-82770296_R	0.0222379	0.0329461	0.0443718	0.0418379	0.0403716	0.0390917	0.0273035	0.034657	0.025459	0.0160603	0.0202543	0.0319146
252	A_30_P01017954	chr16:3872469-3877048_F	chr16:3872469-3877048_F	0.0253223	0.00662933	0.0176165	0.00633829	0.0089988	0.0259876	0.0273944	0.0145881	0.0146316	0.00699319	0.00785306	0.00951628
253	A_66_P115757	Mthfd2l	NM_026788	1.79784	1.87001	2.13848	2.33777	2.06206	1.95085	1.82089	1.84196	2.08753	2.10137	2.17159	1.85465
254	A_55_P2094324	Olfr486	NM_146496	0.00684608	0.00662267	0.0132926	0.00633308	0.00899187	0.0173759	0.0104316	0.0102075	0.00736095	0.0069954	0.00786297	0.00952521
255	A_30_P01020068	chr5:14921737-14978834_F	chr5:14921737-14978834_F	0.0940702	0.0679242	0.123174	0.0669595	0.0584807	0.0986511	0.0724108	0.0917816	0.0773462	0.0540948	0.0492158	0.0777537
256	A_52_P266320	Akap17b	NM_001081956	1.12826	1.11839	1.02413	1.15717	1.1201	1.1642	1.26297	1.19251	1.19826	1.15979	1.21169	1.17053
257	A_55_P2001753	TC1699856	TC1699856	0.00842544	0.00661947	0.0167822	0.0218739	0.00898993	0.0148776	0.0346661	0.0160341	0.00735884	0.00699801	0.00788575	0.00954572
258	A_30_P01026173	chr16:9129538-9137898_F	chr16:9129538-9137898_F	0.117956	0.0786221	0.108165	0.0765923	0.106949	0.0942718	0.0951364	0.100638	0.0422326	0.0329824	0.042833	0.0281998
259	A_55_P2136606	Crnn	NM_001081200	0.0729447	0.0588949	0.0697726	0.0786322	0.0961485	0.157266	0.106084	0.106033	0.0468362	0.0279158	0.0252915	0.0465855
260	A_55_P2065074	Hdac9	NM_001271386	0.0495812	0.0448594	0.0445436	0.0611305	0.076189	0.088642	0.0397051	0.0780618	0.054765	0.0355965	0.0602562	0.0753442
261	A_30_P01029687	chrX:102222494-102267068_F	chrX:102222494-102267068_F	0.00683424	0.00961336	0.0131424	0.0134059	0.045584	0.0283317	0.00838602	0.00755738	0.00737038	0.00701621	0.0279113	0.00958724
262	A_51_P125691	Cdca4	NM_028023	0.282865	0.252065	0.280557	0.269541	0.366146	0.238271	0.176806	0.250783	0.255047	0.2304	0.254433	0.217146
263	A_52_P643087	Olfr315	NM_146538	0.00683914	0.00663608	0.007114	0.0150281	0.00901942	0.00916403	0.014667	0.0108062	0.00738138	0.0070301	0.00796054	0.00961371
264	A_51_P117236	Zfp354a	NM_009329	0.593909	0.547995	0.602436	0.603614	0.661183	0.599471	0.521266	0.603513	0.574528	0.497407	0.546992	0.589959
265	A_51_P519251	Nupr1	NM_019738	0.920833	1.26712	1.70233	1.14177	1.02413	1.17711	0.957415	1.45368	1.24216	0.885206	1.06823	0.967573
266	A_52_P476431	Evc	NM_021292	0.497179	0.487121	0.6887	0.494923	0.425677	0.533192	0.546116	0.551237	0.499584	0.502857	0.561186	0.479749
267	A_55_P2047168	Notch1	NM_008714	0.0423137	0.0406521	0.0519005	0.0395907	0.084243	0.053453	0.046112	0.051566	0.0566829	0.0373525	0.0416666	0.024635
268	A_55_P2064180	Hormad1	NM_001289534	0.0126717	0.0138057	0.0133961	0.00757389	0.0338206	0.0229678	0.0151974	0.0100191	0.0141011	0.0124807	0.0172729	0.00969472
269	A_55_P2031966	Fbxo39	NM_001099688	0.844696	0.73584	0.828203	0.786432	0.806922	0.787972	0.772392	0.857141	0.821336	0.647125	0.694405	0.834893
270	A_51_P476960	Csmd3	NM_001081391	0.0557463	0.0229542	0.0367545	0.0253674	0.0424719	0.0267109	0.0327904	0.0248467	0.0198472	0.0522068	0.0408061	0.0285569
271	ERCC-00148_99	ERCC-00148_99	ERCC-00148_99	0.500898	0.527245	0.437814	0.413062	0.547505	0.456544	0.5754	0.558974	0.251262	0.197308	0.249875	0.333282
272	A_55_P2037643	A_55_P2037643	A_55_P2037643	0.00690267	0.00671251	0.00670627	0.00642945	0.00913693	0.00929819	0.00856161	0.0076878	0.00747239	0.00712422	0.00813277	0.00977345
273	A_55_P1955701	Gm6146	AK053902	0.0648742	0.0302827	0.117955	0.0257321	0.0790556	0.0372396	0.00858378	0.0428014	0.0851175	0.0301891	0.00815526	0.0256692
274	A_66_P135165	Nfib	NM_001113209	0.187834	0.189248	0.238085	0.175812	0.212253	0.210007	0.17208	0.207556	0.165972	0.168328	0.217203	0.18542
275	A_55_P2129691	AB124611	NM_001198794	6.67422	6.30596	5.74135	6.22003	6.62409	6.84803	6.68966	6.54198	6.36527	6.87518	6.87297	7.11896
276	A_51_P112734	Slc7a8	NM_016972	1.60996	1.69766	1.46346	1.72474	1.70764	1.69143	1.66582	1.79401	1.65085	1.76708	1.10516	1.57064
277	A_55_P2025203	Hrasls5	AK006790	0.00696316	0.00677581	0.00679107	0.00649465	0.00923301	0.00940231	0.00867777	0.007777	0.00754518	0.00719205	0.00825187	0.00988456
278	A_30_P01027714	chr12:81217572-81233910_R	chr12:81217572-81233910_R	0.28868	0.303115	0.300974	0.213706	0.355881	0.265371	0.217502	0.236839	0.281553	0.212713	0.321384	0.198776
279	A_55_P2017964	Unc13a	NM_001029873	0.217431	0.169085	0.131416	0.205751	0.358989	0.210734	0.216376	0.218475	0.179921	0.223279	0.219935	0.217999
280	A_30_P01030671	chr4:101010948-101032148_F	chr4:101010948-101032148_F	0.00700886	0.00681865	0.00684757	0.00654017	0.00929784	0.00947122	0.00875517	0.00783754	0.00759378	0.00723621	0.00832713	0.00995736
281	A_30_P01020443	chr18:84757475-84757969_R	chr18:84757475-84757969_R	0.102218	0.0952997	0.126989	0.139963	0.0893388	0.104266	0.126101	0.153605	0.116995	0.109163	0.132342	0.107895
282	ERCC-00081_60	ERCC-00081_60	ERCC-00081_60	0.00703791	0.00684821	0.00688632	0.00657061	0.00934508	0.00952083	0.00880937	0.00787815	0.00762684	0.00726537	0.00837851	0.0100065
283	A_30_P01018957	chr10:81680941-81704964_R	chr10:81680941-81704964_R	0.177623	0.134804	0.175373	0.137682	0.151826	0.119477	0.140612	0.160301	0.167071	0.139517	0.168262	0.142188
284	A_55_P2045777	NAP095730-001	NAP095730-001	0.0920931	0.0600011	0.122364	0.102734	0.104944	0.103858	0.0780416	0.107173	0.0927394	0.0876614	0.0678634	0.0886133
285	A_55_P2059860	Igsf1	NM_183335	0.00708802	0.00689378	0.00694577	0.00662026	0.00941523	0.00959464	0.00889354	0.00794261	0.00767911	0.00730964	0.00845508	0.0100838
286	A_55_P1953003	Atp6v0a4	NM_080467	0.0948535	0.11606	0.10336	0.102729	0.0931219	0.0868809	0.0976673	0.108419	0.0873644	0.101896	0.104802	0.102939
287	A_51_P126365	Gzmn	NM_153052	0.00712257	0.00692446	0.00698527	0.00665209	0.0770174	0.009644	0.00895021	0.0079857	0.00799501	0.00733696	0.00850548	0.0101323
288	A_55_P1955532	Tfr2	NM_001289509	0.504876	0.656606	0.46907	0.661333	0.65794	0.628494	0.579799	0.569511	0.719077	0.620231	0.662657	0.536053
289	A_55_P2070786	Mrps14	XM_006496954	0.0334557	0.0443613	0.0493079	0.0743559	0.0519995	0.0535137	0.0473622	0.0286451	0.0382442	0.0742211	0.0498167	0.0600609
290	A_55_P2027412	A_55_P2027412	A_55_P2027412	1.89469	1.731	1.54648	1.9438	1.64106	1.78909	1.74656	1.43427	1.79916	1.78441	1.72467	1.7944
291	A_51_P117087	Kcnip1	NM_027398	0.801022	0.842675	0.597702	0.891197	0.964708	0.945468	0.921093	0.711193	0.928048	0.956883	0.818672	0.956169
292	A_51_P144770	2410002F23Rik	BC016099	11.4278	11.8999	12.1795	10.8224	10.4792	10.8784	10.4921	11.4429	10.8171	11.1026	10.9984	10.7681
293	A_51_P120589	Olfr181	NM_146999	0.00722684	0.0158694	0.0210058	0.028299	0.0161024	0.00978831	0.00911905	0.022403	0.0117675	0.0237607	0.00864121	0.0102765
294	A_55_P2404808	2210406H18Rik	AK008836	0.00724619	0.00702344	0.0140684	0.00676275	0.00962893	0.00998654	0.00914597	0.0081316	0.00782081	0.0144144	0.0199536	0.0102989
295	A_30_P01020409	chr10:9322308-9332183_F	chr10:9322308-9332183_F	0.0283634	0.0173152	0.0248847	0.0191121	0.0219344	0.0181423	0.0257011	0.0226726	0.0297564	0.0221667	0.0260756	0.0192263
296	A_30_P01025161	chr4:8865575-8899400_F	chr4:8865575-8899400_F	0.016215	0.00704831	0.00714988	0.0067909	0.00967108	0.00985222	0.00919888	0.00816927	0.00784538	0.0130467	0.00869708	0.0103419
297	A_52_P114282	Armcx5	NM_001009575	2.0236	2.39438	1.82596	2.2779	2.18454	2.34141	1.95171	2.18512	1.97012	2.44433	2.19259	1.97901
298	A_55_P1978018	Gm5795	NM_001270806	0.187116	0.184971	0.0994667	0.215408	0.20479	0.209456	0.178626	0.191522	0.211607	0.211773	0.138365	0.148392
299	A_30_P01031829	chr4:44181997-44249172_R	chr4:44181997-44249172_R	0.0591323	0.0456039	0.0588024	0.0505133	0.0436501	0.0624041	0.0370778	0.0776879	0.046796	0.0372927	0.0266623	0.0729216
300	A_55_P2045824	Speer3	NM_027650	0.0856335	0.0855194	0.107864	0.00785831	0.0233922	0.0687662	0.0480939	0.0699311	0.0470206	0.0199894	0.00875233	0.0130764
301	A_30_P01020248	chr5:106982442-107045717_R	chr5:106982442-107045717_R	0.024999	0.0345701	0.0125155	0.0275578	0.0167907	0.0855244	0.00931442	0.0433465	0.027552	0.0206951	0.0364757	0.0104323
302	A_52_P66520	Clec12a	NM_177686	0.00737134	0.00709822	0.00722633	0.00685866	0.00977434	0.00995241	0.00933191	0.00826097	0.00789318	0.00745128	0.00876989	0.0104467
303	A_55_P2081273	Gabbr2	NM_001081141	2.18068	2.24893	1.74077	2.57923	2.62986	2.50236	2.25012	3.14618	2.44429	2.30734	2.83318	2.8613
304	A_52_P365011	Fes	NM_010194	0.319639	0.438599	0.467417	0.309846	0.353774	0.461983	0.326952	0.298643	0.291093	0.339156	0.331674	0.232956
305	A_52_P580582	Nppa	NM_008725	0.385275	0.439776	0.35854	0.443627	0.111969	0.520771	0.382716	0.473643	0.395999	0.48035	0.397081	0.369122
306	A_55_P2117033	Mtmr3	NM_028860	2.00774	1.66082	1.80128	1.88335	1.86159	1.83891	1.884	1.91956	1.76372	1.72899	1.9388	2.15542
307	3xSLv1	3xSLv1	3xSLv1	0.00742524	0.00711	0.00725278	0.00688579	0.00981874	0.00998797	0.00940989	0.00830217	0.00789194	0.00742081	0.00877802	0.010494
308	A_55_P1975456	Nfyb	NM_010914	1.03852	1.24787	1.08479	1.04931	0.964654	1.1418	1.11038	1.10466	1.02377	1.12665	1.24244	1.06159
309	A_55_P2109342	Rnps1	NM_009070	2.15912	1.96568	1.9946	1.98828	1.9128	2.04254	2.03187	2.01548	2.06756	2.19023	1.91283	1.84385
310	A_30_P01031351	chr15:102947390-102971082_R	chr15:102947390-102971082_R	0.699449	0.612882	0.656794	0.706587	0.683572	0.743727	0.705465	0.764661	0.628339	0.618989	0.593318	0.645449
311	A_55_P2408330	Rbm33	NM_028234	0.923183	0.885764	1.07188	1.01775	0.922842	1.04732	1.03751	0.940049	0.930111	1.00467	1.16076	0.765752
312	A_55_P2134427	NAP111310-1	NAP111310-1	3.65188	3.20297	2.70502	3.48317	3.57453	3.52325	3.29154	3.13264	3.23704	3.7537	3.52843	3.70519
313	A_55_P2062324	LOC102634570	XM_006542476	0.00744643	0.00705663	0.0210559	0.0130348	0.0584235	0.014552	0.0191055	0.00828693	0.0166183	0.00731379	0.00868892	0.017732
314	A_52_P431294	Gm4894	NM_177701	0.0074453	0.00704087	0.00720685	0.0068562	0.00978671	0.00994326	0.00942693	0.00827666	0.00779982	0.00728689	0.00866318	0.0104818
315	A_55_P2130104	Slc52a3	NM_027172	0.105931	0.108975	0.0923916	0.0996605	0.0714458	0.134183	0.084692	0.0901891	0.111742	0.108136	0.105267	0.116253
316	A_51_P104718	Gpr12	NM_001010941	0.00743533	0.00700217	0.00717133	0.00682947	0.00975261	0.00990348	0.00940708	0.0082468	0.00774861	0.0072247	0.00860165	0.0104532
317	A_30_P01018437	chr1:183142656-183163206_F	chr1:183142656-183163206_F	0.0656573	0.0738431	0.0821275	0.0878265	0.048096	0.100657	0.0567289	0.0621724	0.047854	0.039166	0.0449507	0.0513104
318	A_51_P118132	Skil	NM_011386	0.622143	0.686633	0.891726	0.6016	0.578683	0.66317	0.685652	0.621956	0.618103	0.643802	0.636499	0.607445
319	A_55_P2102664	ENSMUST00000099266	ENSMUST00000099266	0.465506	0.40846	0.415752	0.438263	0.414666	0.427074	0.427135	0.451082	0.31143	0.307763	0.37884	0.311812
320	A_51_P435198	Cryz	NM_009968	3.01079	3.0882	3.54188	3.61405	3.12761	3.41331	3.28505	3.05531	2.89699	3.20113	3.275	3.09952
321	A_51_P218041	Tatdn1	NM_175151	0.0165283	0.00685926	0.00764989	0.0132183	0.012221	0.00974243	0.0093019	0.00812341	0.0162458	0.00701656	0.0083783	0.0103317
322	A_51_P165934	Phb	NM_008831	4.93953	5.35115	5.64874	5.92401	5.71577	6.23731	5.85364	6.32069	5.44842	6.27521	5.28826	5.40587
323	A_55_P1987336	A_55_P1987336	A_55_P1987336	0.0374497	0.0302407	0.0257934	0.0409632	0.0197339	0.0218771	0.0139967	0.049878	0.0283271	0.0158285	0.00965223	0.0102652
324	A_51_P121818	Prkag1	NM_016781	3.73176	3.80505	3.32681	3.93738	3.7556	3.71361	3.83898	3.69476	3.76036	3.93469	3.3746	4.19616
325	A_30_P01026525	chr8:82854412-82919089_R	chr8:82854412-82919089_R	0.0205335	0.0243268	0.0444223	0.03031	0.0147861	0.024468	0.0218572	0.0249355	0.0161634	0.00689667	0.00812716	0.0101744
326	DarkCorner	DarkCorner	DarkCorner	0.00724779	0.00664356	0.00681601	0.00654201	0.00936121	0.00948181	0.0091018	0.00791589	0.00730349	0.00672869	0.00805233	0.0101261
327	DarkCorner	DarkCorner	DarkCorner	0.00721282	0.00658999	0.00676195	0.00649727	0.00930021	0.00941742	0.00904932	0.00786403	0.00723975	0.00666086	0.00797357	0.0100752
328	GE_BrightCorner	GE_BrightCorner	GE_BrightCorner	48.1298	39.4557	41.7321	39.3862	42.0599	43.8122	45.2559	44.0905	43.0052	40.8868	42.2518	44.8253
329	DarkCorner	DarkCorner	DarkCorner	0.00750656	0.00699121	0.00683243	0.00636857	0.00968445	0.0104449	0.00894514	0.00805543	0.00805352	0.0073714	0.00874179	0.010428
330	DarkCorner	DarkCorner	DarkCorner	0.00758573	0.0070729	0.00691325	0.00645479	0.00978857	0.0105277	0.00903529	0.00813795	0.00813989	0.00744726	0.00881632	0.0104826
331	A_30_P01028640	chr12:20240893-20435318_R	chr12:20240893-20435318_R	0.0268937	0.0254767	0.0214603	0.0423278	0.0188458	0.0367828	0.0310419	0.0287381	0.0332234	0.0162096	0.02253	0.0162741
332	A_51_P117115	Olfr53	NM_146960	0.0375998	0.0376122	0.0208062	0.0214833	0.0440712	0.0289681	0.0315207	0.0218552	0.0210586	0.0206851	0.0230992	0.0105803
333	A_30_P01027048	chr1:73004154-73007481_F	chr1:73004154-73007481_F	0.00779857	0.00729568	0.00713289	0.00668389	0.0100691	0.130384	0.047434	0.00835966	0.00836873	0.00765063	0.00900614	0.0106228
334	A_30_P01028853	chr18:75513062-75523889_R	chr18:75513062-75523889_R	0.443494	0.366391	0.377338	0.415027	0.378174	0.489839	0.347593	0.398528	0.269882	0.29591	0.273698	0.27289
335	A_55_P1964648	Btla	NM_001037719	0.0713081	0.0658628	0.0737683	0.0472061	0.0595494	0.120294	0.0548617	0.0354345	0.0485829	0.0658625	0.109207	0.0391227
336	A_55_P2102816	Rpl36a	NM_019865	16.678	17.6159	17.1647	16.389	16.7808	17.8881	17.7236	15.7248	18.9185	18.8719	17.5064	19.335
337	A_55_P1955483	Grb14	NM_016719	3.50679	4.4373	3.32202	4.53707	4.14797	4.25013	4.01096	3.79091	4.07856	4.85779	4.45746	3.7815
338	A_51_P124719	Ccdc93	NM_001025156	0.411957	0.414234	0.366859	0.351435	0.51225	0.332291	0.430152	0.401241	0.344226	0.312617	0.315098	0.299185
339	A_51_P211325	Nudt2	NM_025539	1.08584	1.0258	1.03107	1.08477	1.1295	1.43507	1.11338	1.04145	1.29578	1.22842	1.24243	1.1959
340	A_55_P2164055	Efcab12	NM_001110506	0.113409	0.084557	0.0986915	0.0855891	0.133623	0.13441	0.121059	0.0956712	0.0697996	0.0995109	0.0756921	0.0468935
341	A_30_P01031037	chr1:92177032-92180487_F	chr1:92177032-92180487_F	0.00818826	0.00770973	0.00753846	0.0155593	0.010582	0.0110814	0.0101956	0.0134083	0.0255869	0.00994685	0.0123936	0.0199561
342	A_30_P01029915	chr13:98479793-98481177_R	chr13:98479793-98481177_R	0.00822003	0.00774398	0.0128194	0.00717542	0.0259391	0.0111042	0.0137905	0.00879233	0.0123831	0.00804764	0.0179591	0.0108439
343	A_55_P2039044	Cyp3a59	NM_001105160	0.00824938	0.00777437	0.00760166	0.00721596	0.0106536	0.0111183	0.00976027	0.0088199	0.00884111	0.0080774	0.00934253	0.010856
344	A_30_P01022811	chr1:138570107-138632310_F	chr1:138570107-138632310_F	0.0296297	0.00780095	0.0193632	0.0143912	0.0106923	0.0385757	0.00978626	0.0143066	0.0195705	0.0121037	0.0174469	0.0108615
345	A_55_P2025258	A_55_P2025258	A_55_P2025258	0.00829151	0.0078262	0.00764945	0.00727452	0.0107144	0.0111386	0.160431	0.00886534	0.00888221	0.00811762	0.00936329	0.0108615
346	ERCC-00053_71	ERCC-00053_71	ERCC-00053_71	0.00830865	0.00784374	0.00767267	0.00730001	0.0107392	0.011145	0.194626	0.0438262	0.00889777	0.00813483	0.00937036	0.0108639
347	A_30_P01027121	chr17:6265275-6362150_R	chr17:6265275-6362150_R	0.0541015	0.12949	0.0615797	0.0165354	0.120903	0.0778482	0.105267	0.142373	0.174123	0.149342	0.098216	0.176275
348	A_51_P180176	Gm16223	AK035725	0.235673	0.23549	0.229696	0.222897	0.318924	0.22633	0.225316	0.279751	0.275622	0.281364	0.250821	0.24415
349	A_51_P236469	Metap1d	NM_025633	0.252313	0.578024	0.215885	0.224354	0.232577	0.620987	0.202863	0.214904	0.192111	0.257054	0.246622	0.219543
350	A_55_P1961433	A_55_P1961433	A_55_P1961433	0.00834487	0.00789707	0.00772043	0.00737511	0.123148	0.0111274	0.0098566	0.00891881	0.0149097	0.00817078	0.00935651	0.0108402
351	A_55_P1964368	Kctd14	NM_001012434	0.189788	0.233691	0.235479	0.173288	0.310302	0.36822	0.194774	0.216005	0.197273	0.187322	0.239049	0.166296
352	A_55_P2248095	4930565N06Rik	NR_040476	0.00834662	0.00790506	0.00772497	0.007398	0.0216506	0.0361981	0.0323346	0.00891909	0.00892623	0.00817214	0.00933443	0.0108168
353	A_55_P2164221	Tpt1	NM_009429	218.907	230.21	231.833	203.914	207.101	211.206	219.148	195.378	229.901	237.21	220.144	236.191
354	A_51_P114966	Prss37	NM_026317	0.443971	0.405778	0.397935	0.371154	0.409575	0.395926	0.374623	0.375723	0.391584	0.373434	0.40962	0.390055
355	A_30_P01023864	chr7:131819366-131852866_F	chr7:131819366-131852866_F	0.0123183	0.00789802	0.0240842	0.0204085	0.0147642	0.0110371	0.0278884	0.027946	0.00890069	0.0135745	0.00928193	0.0210015
356	A_55_P2092958	Traf2	NM_001290413	0.276552	0.282376	0.290233	0.286152	0.294504	0.238683	0.251999	0.276454	0.275908	0.206088	0.230406	0.284621
357	A_55_P2131979	2015-03-01	NM_175188	22.9393	20.8706	20.3437	19.0877	21.4191	21.8125	21.9361	20.1841	24.0357	22.3764	21.076	23.8711
358	A_30_P01027040	chr13:98571741-98603323_F	chr13:98571741-98603323_F	0.00829327	0.00786913	0.00768985	0.00739935	0.010722	0.0109537	0.00978009	0.00886118	0.0158749	0.00812719	0.0092145	0.0107038
359	A_51_P100625	Apon	NM_133996	0.00827673	0.00785808	0.0333402	0.0175267	0.0812163	0.0144209	0.0185257	0.0336316	0.0139751	0.00811271	0.00918883	0.0106813
360	A_52_P586004	Hk3	NM_001033245	0.127499	0.209949	0.121373	0.145101	0.167247	0.116499	0.115009	0.10903	0.0976671	0.160928	0.187386	0.11395
361	A_30_P01031282	chr6:67155508-67216941_F	chr6:67155508-67216941_F	0.0254241	0.0338108	0.0432534	0.052275	0.0408158	0.0416985	0.0539584	0.0424798	0.0482594	0.00807917	0.0329532	0.0418883
362	ERCC-00158_78	ERCC-00158_78	ERCC-00158_78	0.00821854	0.00780919	0.00762828	0.00736048	0.0939107	0.0108143	0.0096892	0.00878371	0.00876721	0.00806304	0.00910319	0.0179578
363	A_51_P224175	2210016F16Rik	NM_027335	0.200339	0.223355	0.198032	0.194458	0.418528	0.1947	0.186964	0.21033	0.248346	0.200626	0.198923	0.178568
364	A_55_P2088268	Olfr782	NM_001011797	0.00817098	0.00776894	0.00758915	0.00733193	0.0105678	0.0107408	0.0515882	0.00873567	0.00871193	0.00801908	0.00903897	0.0105463
365	A_55_P2047196	1700029I15Rik	ENSMUST00000111280	0.0248281	0.0102142	0.0208695	0.00804095	0.0287207	0.0379451	0.0254552	0.0127077	0.0172293	0.0278598	0.0372003	0.0310885
366	ERCC-00003_63	ERCC-00003_63	ERCC-00003_63	0.00811924	0.00772416	0.0120391	0.00729788	0.0105023	0.0125564	0.00957751	0.00868348	0.00865331	0.00797367	0.00897223	0.0104879
367	A_30_P01025872	chr13:94194458-94195068_R	chr13:94194458-94195068_R	0.0261623	0.0201263	0.00897872	0.0196825	0.0123102	0.0601228	0.0244447	0.00865514	0.0185759	0.0200759	0.0365724	0.0213679
368	A_66_P104833	Slc30a8	NM_172816	0.0967566	0.114912	0.0573235	0.0547665	0.109686	0.0175468	0.0788159	0.101082	0.0909603	0.0867169	0.064519	0.081056
369	A_30_P01025563	chr12:110738120-110769295_F	chr12:110738120-110769295_F	0.0455177	0.0448853	0.0437111	0.0709287	0.0681349	0.0494224	0.0289177	0.0563545	0.0390288	0.0271823	0.0266078	0.0392578
370	A_55_P2009943	Spen	NM_019763	2.56244	2.48653	2.97715	2.96205	2.67057	2.82875	2.48984	3.17488	2.68572	2.61068	2.86854	2.86823
371	A_55_P2002954	A_55_P2002954	A_55_P2002954	0.261534	0.247162	0.296258	0.255804	0.298902	0.253733	0.570501	0.266602	0.363445	0.181959	0.240337	0.396727
372	A_51_P385635	Mrpl53	NM_026744	12.6665	12.8141	11.3971	14.687	13.7648	13.0712	13.8484	12.6015	13.7244	14.6204	14.1091	14.045
373	A_55_P2246700	A_55_P2246700	A_55_P2246700	0.668233	0.628835	0.569331	0.590747	0.637004	0.662616	0.713453	0.759891	0.605637	0.627267	0.540579	0.586529
374	A_30_P01030768	chr13:94186098-94186634_F	chr13:94186098-94186634_F	0.0282395	0.0382408	0.0483627	0.0257918	0.0338126	0.0291125	0.0436211	0.0190996	0.0558105	0.0451742	0.0126711	0.0405061
375	A_55_P2117764	Vangl2	NM_033509	0.30181	0.241598	0.306059	0.298619	0.310356	0.314759	0.293247	0.266375	0.225692	0.191169	0.206991	0.232175
376	A_30_P01025002	chr15:10363330-10371830_R	chr15:10363330-10371830_R	0.0078151	0.0199886	0.00728256	0.0162615	0.0101192	0.0126956	0.00923749	0.00837834	0.0083176	0.00884116	0.014883	0.0101822
377	A_55_P1995427	Nxf2	NM_001289735	0.347704	0.303784	0.328149	0.312198	0.355758	0.27273	0.393185	0.343453	0.180315	0.157579	0.169301	0.206921
378	A_52_P373893	Acvr1b	ENSMUST00000000544	3.08238	3.4615	3.02304	3.58545	3.52097	3.89704	3.4307	3.49838	3.5366	3.95309	3.9564	3.94512
379	A_52_P23661	Cldn19	NM_001038590	1.03278	0.802523	1.02793	0.986988	1.0937	1.01963	0.873151	0.916088	0.919764	1.06962	1.61246	1.09444
380	ERCC-00062_278	ERCC-00062_278	ERCC-00062_278	0.0270831	0.0246029	0.0204143	0.0463947	0.041021	0.0327624	0.0671462	0.0259822	0.0162919	0.0161786	0.0156133	0.0183839
381	A_30_P01024081	chr17:39960567-39992817_R	chr17:39960567-39992817_R	4.7812	3.56757	5.76075	4.83329	4.89035	4.68905	3.31759	7.12803	4.61355	4.5105	5.34081	6.17827
382	A_55_P2115141	Lcor	NM_172154	0.170976	0.177586	0.227499	0.176502	0.146795	0.384129	0.209717	0.212647	0.218694	0.135887	0.151917	0.223317
383	A_55_P2180156	A_55_P2180156	A_55_P2180156	0.0378938	0.0466173	0.0465412	0.0188123	0.0387224	0.226311	0.0439896	0.0437336	0.0464176	0.0270866	0.0374015	0.0309529
384	ETG10_13482	ETG10_13482	ETG10_13482	0.00755414	0.00721867	0.00705974	0.00687194	0.00979562	0.00988242	0.00895872	0.00812426	0.00804038	0.007495	0.00835133	0.00994833
385	A_30_P01024923	chr18:47327300-47333819_F	chr18:47327300-47333819_F	0.00751966	0.00718892	0.00703282	0.00810212	0.0805872	0.00984253	0.00892177	0.00809435	0.00800659	0.00746649	0.00831864	0.00992007
386	A_30_P01024501	chr18:38738876-38739324_R	chr18:38738876-38739324_R	0.0493329	0.0212513	0.0288324	0.0378896	0.148938	0.0259433	0.0253779	0.0302117	0.0364801	0.0353319	0.015614	0.0578212
387	A_55_P2178036	Serpina6	NM_007618	0.00745994	0.0071347	0.0116649	0.00679691	0.00968012	0.0097639	0.0145541	0.00803397	0.0160815	0.0074159	0.00825875	0.0156886
388	A_55_P2114838	A_55_P2114838	A_55_P2114838	29.3549	32.5325	29.763	30.3323	29.9371	28.8965	29.5299	27.0506	32.7036	32.6972	29.6333	30.3022
389	A_30_P01033284	chr8:27129927-27137444_F	chr8:27129927-27137444_F	0.0251529	0.0213058	0.0284809	0.0239678	0.0504004	0.00968936	0.00879753	0.0194351	0.0180411	0.0228614	0.0189815	0.0200078
390	A_52_P339722	Csnk1a1	NM_146087	9.41594	8.73944	9.31589	8.99614	8.84525	9.45506	9.25068	8.72067	9.43067	8.09275	9.06068	9.68919
391	A_52_P488427	Sec14l2	NM_144520	1.12403	1.15576	1.16949	1.16994	1.47495	1.30332	1.23481	1.20271	1.03244	1.27871	1.28853	1.19263
392	A_55_P1975667	Rhox4g	NM_001039698	0.155103	0.145641	0.156361	0.125398	0.180134	0.161337	0.200988	0.161582	0.221586	0.132885	0.164277	0.256788
393	A_30_P01020724	chr18:36449530-36456800_F	chr18:36449530-36456800_F	1.59286	1.2277	1.44211	1.40982	1.52864	1.44921	1.35441	1.47036	1.49647	1.42447	1.56752	1.7393
394	A_55_P2117146	Pa2g4	NM_011119	1.2231	1.33404	1.19882	1.17711	1.20876	1.26035	1.17744	1.03181	1.24124	1.25919	1.17762	1.15838
395	A_55_P1991440	Zscan21	NM_011757	5.41962	5.50039	5.26001	5.56852	5.1586	4.91056	5.11868	5.42415	5.52326	5.68261	5.43626	5.33111
396	A_30_P01031650	chr12:20204125-20268950_R	chr12:20204125-20268950_R	0.00798693	0.00690881	0.00677349	0.00659496	0.00937409	0.00945992	0.00860526	0.00779822	0.00767983	0.00975293	0.00803485	0.00967366
397	A_30_P01030711	chr18:35972802-35973126_F	chr18:35972802-35973126_F	0.0121697	0.0164354	0.0186359	0.0168896	0.00934507	0.0829156	0.0568467	0.0133415	0.00765813	0.0123322	0.034202	0.00965639
398	A_55_P1958503	ENSMUST00000180188	ENSMUST00000180188	0.00715623	0.00686698	0.00673522	0.00655642	0.00931672	0.0774068	0.0883489	0.00775468	0.00940595	0.00717885	0.0134827	0.00964045
399	A_52_P67995	Eif4a3	NM_138669	1.78921	1.74242	1.54395	1.74987	1.68831	1.63217	1.63761	1.55982	1.76721	2.11704	1.74486	1.77304
400	A_66_P114042	Kctd7	NM_172509	0.0328204	0.0210165	0.0231829	0.0283722	0.248837	0.1662	0.0175397	0.0306758	0.0346145	0.0338479	0.0287297	0.0428581
401	A_55_P2457153	G2e3	NM_001167963	0.195004	0.209355	0.333117	0.219834	0.355294	0.267655	0.267401	0.250677	0.256554	0.197172	0.210325	0.217158
402	A_52_P111845	Nxph2	NM_008752	0.00706774	0.00679112	0.00666957	0.00648777	0.0755607	0.0093075	0.0428316	0.00767855	0.00754888	0.00711587	0.00793324	0.0095843
403	A_51_P482148	Mecom	NM_007963	0.0194783	0.010733	0.0302818	0.0192262	0.0187986	0.0116186	0.0288771	0.013377	0.00752907	0.0196976	0.0122344	0.00957406
404	A_55_P2125823	A_55_P2125823	A_55_P2125823	4.4404	5.27666	4.97085	4.36245	4.27709	4.27708	4.30149	4.05543	4.71929	4.3938	4.78769	4.37752
405	A_66_P102581	Ube2z	NM_172300	5.12592	5.76196	4.84542	5.82454	5.84768	5.54987	5.39412	6.25369	6.01825	5.57228	5.62058	6.04948
406	A_55_P1986701	1700055N04Rik	NM_028545	0.00699305	0.00672906	0.00661803	0.00643096	0.103231	0.0092301	0.00841623	0.00761935	0.00748158	0.00706575	0.00788767	0.0095455
407	A_51_P112355	Igtp	NM_018738	7.83101	10.281	3.94944	2.76511	2.41397	2.55323	2.88058	2.93237	3.08178	8.30044	2.08614	2.15133
408	A_55_P2088237	Cyp27b1	NM_010009	0.0340942	0.0456459	0.0625322	0.0548066	0.0515342	0.0522062	0.111421	0.0602961	0.0367326	0.0224401	0.0165624	0.0117492
409	A_51_P179531	Flt4	NM_008029	0.00694697	0.00755877	0.0152899	0.00999736	0.00908321	0.00918659	0.0183399	0.00758355	0.00743902	0.0123689	0.00883418	0.00952699
410	A_55_P2040583	Map6d1	NM_198599	13.7948	11.6965	12.393	11.7983	13.2528	13.1939	14.1682	13.4837	14.6551	13.2394	13.7666	14.8091
411	A_30_P01031337	chr12:53669892-53710742_F	chr12:53669892-53710742_F	0.202042	0.222993	0.235813	0.217313	0.19582	0.212941	0.226549	0.219657	0.212463	0.196197	0.246167	0.222812
412	A_55_P1991770	Pdlim4	NM_019417	14.2838	12.9355	16.8986	9.04569	10.5886	9.28704	12.2962	10.8977	13.4994	11.2541	7.89257	11.1505
413	ERCC-00039_95	ERCC-00039_95	ERCC-00039_95	0.00689836	0.00665518	0.0191924	0.00636395	0.00903536	0.0264533	0.0781044	0.0086752	0.00739999	0.00701367	0.00785655	0.0095172
414	A_51_P117604	Rab5a	NM_025887	11.7053	12.2029	10.7144	12.5725	12.2799	12.144	11.8478	11.8408	12.6936	13.2179	12.9294	12.806
415	A_55_P1994633	Gm711	NM_198628	0.0525246	0.0565373	0.0636827	0.0516854	0.0533256	0.0604281	0.0488493	0.0511816	0.0502257	0.0488347	0.0688387	0.0396717
416	A_52_P347764	4930451C15Rik	NM_029053	0.00687239	0.00663715	0.066474	0.0112714	0.00901342	0.00913001	0.00869032	0.0156222	0.00958125	0.00700492	0.00963819	0.00952133
417	A_55_P2400691	Arhgap21	NM_001128084	12.6069	13.5823	12.8296	14.5069	15.7287	14.9421	14.8544	13.5965	14.0567	14.5022	13.3695	14.4414
418	A_30_P01025678	chr10:117021051-117038683_F	chr10:117021051-117038683_F	0.0189657	0.0294861	0.0243456	0.0150907	0.015399	0.0377043	0.0160762	0.0415498	0.0275093	0.0175143	0.0288421	0.032557
419	A_30_P01030886	chrX:121004130-121007360_R	chrX:121004130-121007360_R	0.00685374	0.00662765	0.00655594	0.00686261	0.0090018	0.0186895	0.00835033	0.0113351	0.0073718	0.00882851	0.00787715	0.0095351
420	A_55_P1978336	Tmem170b	NM_001163572	0.185926	0.164104	0.229914	0.203051	0.176735	0.217971	0.231781	0.170988	0.176331	0.166345	0.199504	0.198571
421	(+)E1A_r60_a22	E1A_r60_a22	E1A_r60_a22	2.50546	2.50491	2.53576	2.21411	2.28784	2.31829	2.64619	2.92035	2.71817	2.73377	2.68661	3.61331
422	A_30_P01031093	chr6:5311375-5328075_R	chr6:5311375-5328075_R	0.013819	0.0101114	0.0244637	0.0138242	0.0090027	0.0130111	0.0118797	0.0075441	0.0108209	0.011587	0.0180018	0.0190591
423	A_51_P435363	Lipe	NM_010719	0.0763138	0.0774905	0.0751186	0.0847073	0.0968843	0.225555	0.0802336	0.0724633	0.0871125	0.0955526	0.0565172	0.060903
424	A_52_P116134	Aldh2	NM_009656	3.47955	3.63016	3.61495	4.5842	4.26782	4.04969	3.61399	4.10392	3.76405	4.73362	4.04502	4.31888
425	A_55_P1960659	Fer1l6	ENSMUST00000159177	0.0167953	0.0255376	0.0243318	0.0479102	0.0390246	0.137251	0.0232504	0.0372994	0.0221261	0.0161533	0.00793585	0.0249183
426	A_55_P1991945	A_55_P1991945	A_55_P1991945	0.722877	0.604281	0.548672	0.744749	0.864507	0.670746	0.657384	0.593471	0.762215	0.684	0.56792	0.692104
427	A_66_P114582	ENSMUST00000103525	ENSMUST00000103525	0.00684872	0.00664083	0.00659734	0.0063561	0.13179	0.00916707	0.00840964	0.00757437	0.00739165	0.00703781	0.0079637	0.00961399
428	A_55_P2055864	Dvl2	ENSMUST00000102575	0.0268214	0.0143856	0.0143988	0.0175785	0.0326572	0.0337906	0.0195249	0.0147665	0.0130405	0.00744147	0.0230487	0.00962869
429	A_66_P111490	LOC102632690	XR_379571	0.00685676	0.0066522	0.00661651	0.00636813	0.00904586	0.138225	0.0084349	0.00759329	0.00740563	0.00705456	0.00799583	0.00964369
430	A_55_P2106700	Vmn2r59	NM_001105056	0.006862	0.00665902	0.0195925	0.00637527	0.0188052	0.175423	0.00844948	0.00760421	0.00741391	0.00706357	0.00801456	0.00965938
431	A_30_P01029368	chr10:21710544-21710942_F	chr10:21710544-21710942_F	0.00686807	0.0066666	0.00663904	0.00638308	0.0248433	0.00921675	0.114789	0.00761596	0.0074247	0.00707412	0.00803095	0.00967599
432	A_55_P2107995	Psd	NM_028627	0.0877367	0.071606	0.0747406	0.0947152	0.122419	0.0916259	0.0866478	0.103493	0.125	0.161987	0.0977101	0.0925357
433	A_55_P2139886	Sft2d1	NM_134114	0.398806	0.382055	0.396906	0.429359	0.254785	0.374411	0.431886	0.0328412	0.0477622	0.212784	0.400526	0.215839
434	A_52_P257758	Reg4	NM_026328	0.00689103	0.00669391	0.00667815	0.00641114	0.00910929	0.00926285	0.00851853	0.00765619	0.00745564	0.00710524	0.00809095	0.00973125
435	A_55_P1972991	Pcsk6	NM_011048	1.11531	1.20573	1.37469	1.19364	1.51721	1.40992	1.29129	1.03005	1.10275	1.31994	1.88186	1.32621
436	A_30_P01018376	chr1:153685487-153710962_R	chr1:153685487-153710962_R	0.174147	0.179619	0.156761	0.144409	0.150409	0.138029	0.179896	0.143457	0.130853	0.148807	0.136067	0.161147
437	A_52_P116253	Atf2	NM_001025093	0.102191	0.148416	0.117777	0.113543	0.11307	0.114904	0.120262	0.117923	0.123823	0.116949	0.101036	0.125139
438	A_55_P2202184	4933400F21Rik	NR_015540	0.0109969	0.015716	0.0303811	0.0202626	0.0181795	0.124387	0.0374004	0.0362703	0.0240054	0.0094304	0.0132947	0.0239949
439	A_30_P01027718	chr11:58136882-58143829_F	chr11:58136882-58143829_F	0.00694457	0.00675156	0.00675695	0.00647025	0.00919738	0.0235678	0.00862503	0.00773811	0.00752262	0.0117554	0.00820397	0.00996254
440	A_30_P01025243	chr3:121615836-121616109_F	chr3:121615836-121616109_F	0.0069573	0.00676454	0.00677439	0.0151748	0.0689512	0.0120378	0.00864889	0.00775658	0.00753778	0.0200853	0.00822796	0.0098587
441	A_51_P232142	Thumpd3	NM_008188	5.40252	5.69674	4.85517	6.06472	6.05309	5.87598	6.0389	5.3822	6.11643	6.2583	5.5027	5.92352
442	A_51_P112308	1810011O10Rik	NM_026931	0.908096	1.22206	1.36026	1.05488	1.06708	1.01577	1.24678	0.888245	1.01571	0.89084	1.13889	0.971087
443	A_55_P2077497	ENSMUST00000167348	ENSMUST00000167348	126.91	144.224	129.779	122.197	140.253	127.183	155.946	149.282	189.036	122.978	140.793	208.712
444	A_55_P1997585	A_55_P1997585	A_55_P1997585	0.112916	0.10782	0.117906	0.108236	0.0924464	0.114923	0.0698461	0.0942355	0.0697883	0.0788142	0.0978244	0.117025
445	A_30_P01032673	chr11:112898724-113062945_R	chr11:112898724-113062945_R	0.129193	0.0999187	0.147737	0.151147	0.128721	0.181166	0.128185	0.120363	0.116456	0.108005	0.14856	0.0838514
446	ERCC-00147_344	ERCC-00147_344	ERCC-00147_344	0.00704558	0.00685092	0.00688776	0.00657354	0.0093495	0.00952002	0.00880467	0.00787701	0.0076359	0.00727284	0.00838139	0.0100039
447	A_55_P2159865	Zfp59	NM_011762	0.639833	0.684482	0.620432	0.701134	0.701763	0.635011	0.69004	0.635127	0.616205	0.644579	0.652783	0.768043
448	A_55_P2115851	Cemip	NM_030728	0.0113874	0.0235035	0.0129219	0.0184572	0.0153335	0.0320024	0.0302218	0.0402085	0.0375042	0.0207096	0.008433	0.0194483
449	ERCC-00012_90	ERCC-00012_90	ERCC-00012_90	0.0485653	0.0338404	0.060687	0.0662213	0.0623233	0.0541345	0.0539184	0.0569239	0.0395851	0.0475295	0.040612	0.0509771
450	A_55_P2013158	Ablim1	NM_178688	0.473318	0.43251	0.371405	0.477807	0.519184	0.550834	0.495069	0.446738	0.459818	0.552152	0.517068	0.512115
451	A_30_P01033143	chr19:6268793-6276607_F	chr19:6268793-6276607_F	0.00713072	0.00692886	0.00698855	0.00665591	0.109118	0.0096451	0.00894703	0.00798595	0.00772215	0.00734795	0.0105391	0.010131
452	A_55_P2089467	NAP062147-1	NAP062147-1	0.00714777	0.00694354	0.0144104	0.00667197	0.0642069	0.0872565	0.00897485	0.0080071	0.00773773	0.00736011	0.00853427	0.0120115
453	A_52_P637282	Wipf1	NM_153138	2.23145	2.54	2.57571	2.12227	2.24601	2.30275	2.42255	2.3028	2.5461	2.16388	2.12165	1.93825
454	A_65_P16630	BC068281	NM_001170858	0.103363	0.0839865	0.0872991	0.110557	0.119326	0.12447	0.0884344	0.108166	0.130244	0.107949	0.142054	0.117744
455	A_55_P2048508	A_55_P2048508	A_55_P2048508	0.0421828	0.0195065	0.0262358	0.0311078	0.0431146	0.0380331	0.0257882	0.0393295	0.0233099	0.00854575	0.00860586	0.0298686
456	A_30_P01031930	chr7:49715933-49771497_R	chr7:49715933-49771497_R	0.0894018	0.0796353	0.0815222	0.0552886	0.0826003	0.0531924	0.115107	0.0914019	0.0640961	0.0606229	0.0902585	0.0711919
457	A_30_P01027340	chr3:35783763-35784442_R	chr3:35783763-35784442_R	0.0531497	0.0398859	0.0467222	0.0496628	0.0351459	0.0893116	0.0245048	0.0502544	0.0483603	0.0212645	0.0240297	0.0511714
458	A_55_P2149791	CO046494	CO046494	0.074799	0.0667542	0.0588925	0.0554255	0.0687723	0.0608408	0.0559978	0.0738245	0.0774323	0.0757129	0.0689598	0.0991419
459	A_30_P01029403	chr12:111829967-111830904_F	chr12:111829967-111830904_F	0.0662487	0.0579221	0.0536052	0.068159	0.096035	0.0795117	0.0461385	0.0744977	0.0545301	0.0562085	0.0526551	0.0652073
460	A_66_P101786	Gm10748	AK029361	0.0356968	0.0339249	0.0338899	0.0210727	0.00968398	0.0395281	0.0309355	0.0270271	0.00786032	0.0174121	0.0166616	0.0172436
461	A_55_P2085979	Igf1	NM_184052	1.80533	1.56977	1.49541	1.4873	1.64543	1.68188	1.70029	1.55954	1.49291	1.41307	1.41575	1.40335
462	A_51_P217598	ENSMUST00000059966	ENSMUST00000059966	0.00732328	0.0070777	0.00718671	0.00682463	0.00972139	0.00989786	0.00924882	0.00820926	0.00788263	0.00746224	0.00874046	0.0103858
463	A_55_P2358299	AU021128	AU019847	0.00733981	0.00708728	0.00720082	0.00683711	0.00974006	0.00991612	0.0105207	0.00822583	0.0140837	0.00746672	0.00875538	0.0104046
464	A_55_P1969885	A_55_P1969885	A_55_P1969885	0.659176	0.561981	0.803651	0.599315	0.606648	0.659569	0.66451	0.726286	0.67092	0.533102	0.670282	0.73758
465	3xSLv1	3xSLv1	3xSLv1	0.00737017	0.00710387	0.00722639	0.00685952	0.0159632	0.0360916	0.0093175	0.00825587	0.00790816	0.00746879	0.00877935	0.0104402
466	A_55_P2287105	4933407C09Rik	AK016713	0.00738449	0.00711138	0.00723662	0.0068693	0.00978868	0.0327506	0.00933804	0.00827039	0.00791256	0.00747263	0.00879061	0.0104554
467	A_55_P2073642	1600014C10Rik	NM_001085385	0.190224	0.127107	0.109639	0.138318	0.16968	0.175174	0.130296	0.122152	0.147347	0.183316	0.120252	0.201919
468	A_30_P01024658	chr16:64796849-64843249_R	chr16:64796849-64843249_R	0.0112103	0.0332251	0.0251724	0.0299891	0.00981465	0.0258232	0.00937516	0.0363298	0.0164978	0.0228364	0.0099937	0.024236
469	A_30_P01017657	chrX:121970356-121970881_R	chrX:121970356-121970881_R	0.117266	0.101078	0.106145	0.114044	0.122608	0.0992947	0.115154	0.0822627	0.0957783	0.0667789	0.0858257	0.118275
470	A_51_P101375	St6gal1	NM_145933	0.155116	0.0868765	0.11764	0.125144	0.17651	0.138736	0.139366	0.144846	0.119445	0.0991191	0.119904	0.122697
471	A_30_P01031899	chr3:84609788-84618062_F	chr3:84609788-84618062_F	0.00744206	0.00987352	0.00726822	0.00690072	0.00984136	0.0100077	0.00942012	0.0083151	0.00993701	0.00744724	0.00880048	0.0105094
472	A_52_P401475	Ubxn4	NM_026390	0.163236	0.164829	0.179866	0.197102	0.194584	0.200579	0.220692	0.190016	0.185558	0.181136	0.189194	0.178213
473	A_55_P2001510	NAP108184-1	NAP108184-1	270.338	264.909	238.598	269.801	262.758	271.556	268.447	243.344	275.274	282.644	278.668	293.539
474	A_55_P2021378	Wapal	NM_001004436	1.64473	1.56276	1.48997	1.5173	1.63305	1.69855	1.55431	1.46724	1.62609	1.47041	1.67008	1.65295
475	A_30_P01032696	chr5:108544188-108545013_F	chr5:108544188-108545013_F	0.0074667	0.00710377	0.00726096	0.00689959	0.073453	0.0139154	0.107711	0.00832025	0.00788682	0.00739146	0.0087633	0.0105205
476	A_30_P01033588	chr5:110891642-110918642_F	chr5:110891642-110918642_F	0.0146718	0.00709369	0.0178089	0.00689483	0.0673857	0.0250227	0.00945181	0.0294246	0.0251703	0.012429	0.00874613	0.0223513
477	A_55_P2051787	Gbx1	NM_015739	0.0544617	0.0498938	0.0466852	0.059664	0.200793	0.0387215	0.0784831	0.0771816	0.0375844	0.0347339	0.0292672	0.0543118
478	A_55_P2038822	Jph4	AK031092	0.417769	0.409224	0.472325	0.445901	0.510723	0.509211	0.423652	0.575237	0.503273	0.372957	0.466996	0.482957
479	A_55_P2027042	Olfr629	NM_146821	0.00746656	0.0177205	0.0141969	0.0180645	0.00980504	0.00996072	0.0132694	0.0143048	0.00997539	0.00739047	0.00867944	0.0104967
480	A_55_P2114697	Gcm1	NM_008103	112.535	140.309	122.864	115.174	136.517	129.831	155.052	144.88	178.579	115.024	129.635	212.657
481	A_30_P01026324	chr4:149383134-149451259_R	chr4:149383134-149451259_R	0.970545	0.99471	0.983572	1.02448	1.08864	1.11363	1.15979	1.14337	0.926846	0.937584	0.968087	1.06255
482	A_30_P01020924	chr17:95255725-95272425_F	chr17:95255725-95272425_F	0.00744648	0.00972968	0.00715786	0.013316	0.00974372	0.0101696	0.00940247	0.00823872	0.0214059	0.00799578	0.00857116	0.0104459
483	A_55_P1992530	Clec4b1	NM_001190310	0.0205499	0.0159918	0.00875369	0.022836	0.0151447	0.0329252	0.00938357	0.008216	0.0234665	0.0237845	0.0274491	0.0229587
484	A_55_P2106801	Bglap3	NM_031368	0.244865	1.12369	0.237652	0.494791	0.510065	0.520112	0.565121	7.71783	0.460616	0.442211	2.17665	0.883978
485	A_55_P2170817	AI847159	NR_045264	0.380913	0.369069	0.13585	0.241511	0.306455	0.251306	0.311451	0.336264	0.246533	0.367945	0.254855	0.302216
486	A_55_P1967478	Hbb-y	NM_008221	0.00870027	0.0147139	0.00703493	0.0067247	0.0096127	0.0125397	0.0126743	0.00812785	0.0094182	0.00701576	0.00837777	0.0103377
487	A_55_P1968320	Agbl3	ENSMUST00000135304	0.0197006	0.0148242	0.0116833	0.0181428	0.00957	0.00970063	0.00927218	0.00809202	0.0242178	0.00696326	0.00832	0.0103028
488	A_30_P01025820	chr8:91471819-91551119_R	chr8:91471819-91551119_R	0.00734387	0.00678198	0.00695545	0.00666013	0.00952347	0.00965082	0.00923361	0.00805274	0.00747364	0.00690867	0.00825715	0.010264
489	A_30_P01032978	chr15:77164450-77201325_R	chr15:77164450-77201325_R	0.198093	0.211142	0.197502	0.2133	0.262196	0.247975	0.227603	0.225558	0.132154	0.136062	0.14125	0.14737
490	A_55_P2089500	Cyp4f40	NM_001101588	0.0072883	0.00668868	0.0075173	0.018311	0.0240447	0.0181326	0.0153236	0.0107598	0.0073622	0.0136558	0.00811843	0.0101768
491	DarkCorner	DarkCorner	DarkCorner	0.00725936	0.00663459	0.00680917	0.00654279	0.00935948	0.00947624	0.00909171	0.00791396	0.0073018	0.0067187	0.00804229	0.0101257
492	DarkCorner	DarkCorner	DarkCorner	0.00722168	0.00658387	0.00675346	0.00649393	0.00929564	0.00941089	0.00904206	0.00785891	0.0072348	0.00665203	0.00796383	0.0100716
493	DarkCorner	DarkCorner	DarkCorner	0.00756538	0.00705428	0.00689837	0.00643924	0.00976787	0.0105167	0.00902261	0.00811906	0.00812094	0.00744037	0.00880651	0.0104932
494	A_30_P01019936	chr11:53592946-53637922_R	chr11:53592946-53637922_R	0.37402	0.341695	0.261927	0.341575	0.31624	0.373883	0.315952	0.301538	0.286611	0.340897	0.275025	0.255117
495	A_55_P2023523	Aloxe3	NM_011786	0.107809	0.0908864	0.133321	0.112127	0.0921082	0.132738	0.105516	0.0920996	0.0627799	0.0766082	0.072784	0.0562861
496	A_51_P124798	Tmem192	NM_028427	1.35821	1.24345	0.979913	1.29961	1.28649	1.40902	1.2739	1.22199	1.36673	1.49602	1.44463	1.54128
497	A_55_P1952915	Sh3bgr	NM_015825	7.41244	6.62677	5.57361	7.02259	6.15903	8.23464	6.53672	6.46094	6.08661	7.8132	8.2559	6.88533
498	A_55_P1977345	Olfr191	NM_001011807	0.00791102	0.0074125	0.00724918	0.00681297	0.0102207	0.0363557	0.0094079	0.00847742	0.0084903	0.00776973	0.00910874	0.0107164
499	A_55_P2123484	Gm11627	NR_040286	0.146118	0.132705	0.1746	0.181227	0.158436	0.101434	0.122405	0.13112	0.128069	0.102343	0.0968146	0.103297
500	A_30_P01027307	chr4:33369310-33369871_R	chr4:33369310-33369871_R	0.0130858	0.00752717	0.0136477	0.00743214	0.0103648	0.010956	0.0110906	0.0115141	0.00860735	0.00787178	0.00919655	0.0107788
501	A_55_P2262743	LOC102639385	XR_384459	0.00806763	0.00757849	0.00741296	0.00699092	0.0818318	0.0109972	0.00957909	0.00895126	0.00865789	0.00791857	0.00923392	0.0108054
502	A_55_P2164694	A_55_P2164694	A_55_P2164694	0.112063	0.0793227	0.0730619	0.100477	0.130493	0.235334	0.0789265	0.112586	0.124258	0.0834458	0.069355	0.0704008
503	A_55_P2083454	Gm10844	AK131846	0.0627285	0.0446161	0.0390485	0.0392325	0.102646	0.205417	0.0446147	0.0439599	0.0365433	0.0562564	0.0429606	0.0291616
504	A_52_P127362	Vmp1	NM_029478	9.65401	10.487	9.39526	9.48013	8.71153	9.28929	10.3066	8.1812	10.204	9.87611	9.34601	8.98905
505	A_55_P1954388	Vmn2r72	NM_001105185	0.00822162	0.00774563	0.00757501	0.0071784	0.0106285	0.0111153	0.0281042	0.00879836	0.00881903	0.00806346	0.00934049	0.0108694
506	A_55_P2029895	A_55_P2029895	A_55_P2029895	0.00824954	0.00777695	0.00904473	0.00720925	0.0190118	0.011133	0.00977308	0.00882533	0.00884828	0.00808849	0.00935815	0.0108804
507	A_66_P108468	2610528A11Rik	NM_001206684	0.0377458	0.0466812	0.0374716	0.034096	0.0364013	0.0144425	0.0411346	0.0274913	0.0409513	0.0405176	0.0333569	0.0108859
508	A_30_P01033203	chr3:95443575-95462543_R	chr3:95443575-95462543_R	0.0393563	0.03576	0.0406391	0.026376	0.0207276	0.0362457	0.0586876	0.032733	0.0224223	0.0596965	0.0634706	0.0221939
509	ERCC-00077_121	ERCC-00077_121	ERCC-00077_121	0.00831774	0.00785341	0.00767861	0.00730887	0.0107537	0.0134983	0.14174	0.0163216	0.00891146	0.00815216	0.00938776	0.0108879
510	A_51_P103706	Cyp2c29	NM_007815	0.0221057	0.0239223	0.050222	0.0275299	0.0107742	0.0409041	0.0867631	0.0318769	0.021374	0.0138091	0.00939215	0.0290969
511	A_55_P2051414	Axl	NM_009465	3.17645	3.44252	4.17211	2.24075	2.34546	2.19719	2.47093	2.36664	2.58105	1.96909	2.07726	1.88314
512	3xSLv1	3xSLv1	3xSLv1	0.00835357	0.00789889	0.00772391	0.00737268	0.0129549	0.0111602	0.00987604	0.00892684	0.00894352	0.00818637	0.00938522	0.0108809
513	A_55_P1993353	Slc44a5	NM_001081263	0.224067	0.232029	0.296109	0.128078	0.0924445	0.103871	0.16742	0.238055	0.156341	0.106305	0.130557	0.0689188
514	A_30_P01020233	chr18:47690173-47697423_R	chr18:47690173-47697423_R	0.0477424	0.0624731	0.0748676	0.0667825	0.190014	0.103061	0.141378	0.0719975	0.0431883	0.0235939	0.0571561	0.0390279
515	A_30_P01022026	chr10:59382822-59383642_R	chr10:59382822-59383642_R	0.179357	0.148847	0.194983	0.180851	0.189416	0.296737	0.195683	0.161888	0.140144	0.116389	0.110906	0.129963
516	A_52_P45841	Gorasp1	NM_028976	0.359217	0.345616	0.31864	0.440518	0.57765	0.402396	0.356871	0.392358	0.374281	0.427059	0.450313	0.403407
517	A_55_P2049597	Tpp2	NM_009418	2.46768	2.84598	2.32182	2.87547	2.78606	2.73663	2.67022	2.62029	2.96072	2.87282	2.68945	2.63795
518	A_51_P100624	Krtap9-3	NM_029351	0.00834844	0.00791444	0.00773657	0.00742468	0.0107967	0.011066	0.00985444	0.00891832	0.00892374	0.00818552	0.00930988	0.0107984
519	A_66_P100496	Speer4b	NM_028561	0.0572879	0.0624891	0.0743133	0.0332841	0.0891759	0.0339334	0.0705004	0.0761066	0.0216019	0.00817646	0.00928911	0.0232146
520	A_55_P1974804	Slc24a4	NM_172152	0.0871293	0.0824419	0.116108	0.10797	0.0954875	0.0601679	0.0916069	0.0946838	0.0836781	0.059773	0.0698378	0.0891825
521	A_30_P01030305	chr3:21964899-21974524_R	chr3:21964899-21974524_R	0.349172	0.282536	0.426812	0.30894	0.253895	0.248205	0.384408	0.313879	0.405381	0.226793	0.297758	0.259826
522	A_55_P2179074	Ciita	NM_001243760	0.111917	0.0714013	0.0650394	0.0843377	0.0379275	0.0484412	0.0340522	0.0528844	0.053072	0.116516	0.0703054	0.0713252
523	A_30_P01020670	chr12:23420304-23420859_R	chr12:23420304-23420859_R	0.0442057	0.052625	0.0749638	0.0326537	0.0846583	0.0473989	0.0582214	0.0503827	0.0523917	0.0335779	0.0091898	0.0700156
524	A_55_P1979650	S100a1	NM_011309	1.48374	1.8341	1.75862	1.47081	1.25377	1.24658	1.52454	1.40861	1.57259	1.2967	1.43307	1.55003
525	A_52_P487436	Nags	NM_145829	0.00824069	0.00782907	0.0120244	0.00738218	0.0541089	0.0108499	0.0154051	0.011535	0.00879341	0.00808814	0.00913169	0.0239925
526	A_52_P1035965	Flg2	NM_001013804	0.00821939	0.00781012	0.0076329	0.00736937	0.101647	0.0108128	0.00969511	0.00878289	0.00876764	0.00806831	0.00910062	0.0106076
527	A_55_P2081885	A_55_P2081885	A_55_P2081885	102.295	109.857	116.314	100.315	94.9045	102.757	111.618	94.3945	113.241	106.078	104.545	108.106
528	A_52_P409675	Wdr11	NM_172255	0.148116	0.137579	0.142385	0.164177	0.112017	0.158753	0.269487	0.135593	0.152921	0.13626	0.16346	0.14839
529	A_55_P2132932	Mageb1	NM_010759	0.151806	0.13013	0.132353	0.141123	0.165606	0.233192	0.142554	0.141784	0.0791603	0.105951	0.107069	0.123633
530	A_51_P148478	Olfr510	NM_146311	0.00811964	0.00772181	0.00754619	0.00877444	0.0105045	0.0133232	0.0406405	0.00867938	0.00865063	0.0079818	0.00896597	0.0104924
531	A_52_P745	Acox3	NM_030721	3.92647	4.41424	4.04602	4.27143	4.31454	4.91232	4.39791	4.38911	4.38532	4.85148	4.26941	4.25514
532	A_55_P2079024	A_55_P2079024	A_55_P2079024	0.00806103	0.00767148	0.00749712	0.00726295	0.043326	0.0105663	0.00951156	0.00862178	0.00858851	0.00793054	0.00889888	0.010431
533	A_30_P01031719	chr12:89092175-89105525_F	chr12:89092175-89105525_F	0.0157905	0.00764501	0.00833452	0.00724173	0.0202823	0.010523	0.0498797	0.00859167	0.00855571	0.00790463	0.0273668	0.0147714
534	A_55_P1973543	Bbs10	NM_027914	0.157124	0.163119	0.159146	0.167855	0.169757	0.178044	0.371784	0.134033	0.16115	0.170444	0.177759	0.166117
535	A_51_P396385	Mars2	NM_175439	0.0550517	0.0475172	0.0737194	0.0564699	0.106924	0.0554696	0.0648382	0.0600988	0.0608036	0.0770261	0.0468907	0.0685358
536	A_55_P2278093	AI480461	AK148445	0.155989	0.144795	0.144674	0.189771	0.175925	0.189225	0.209068	0.128595	0.156615	0.259403	0.203581	0.159683
537	A_55_P2095899	2310057B04Rik	AK009949	0.164377	0.209193	0.243238	0.265162	0.247808	0.260166	0.27105	0.198026	0.282927	0.181411	0.29656	0.286845
538	A_51_P201480	Stat3	NM_213659	27.2598	31.1708	26.4244	28.9125	27.2255	28.7978	30.5194	32.9066	30.9357	29.9575	29.2976	30.472
539	A_66_P105497	Gm5429	AK040906	0.0311095	0.00747497	0.00730716	0.00709963	0.0101536	0.0102564	0.0349312	0.00840235	0.00898712	0.00773965	0.0086472	0.0102108
540	A_55_P2142439	Echdc2	NM_026728	0.438206	0.561697	0.670539	0.64126	0.634097	0.54422	0.68879	0.502506	0.469434	0.563457	0.609669	0.364
541	A_30_P01020448	chr2:77152807-77155092_R	chr2:77152807-77155092_R	0.024495	0.0367912	0.0278883	0.0272784	0.0386764	0.032136	0.0758185	0.0273649	0.00921761	0.00768345	0.00912789	0.0244818
542	A_55_P2085165	A_55_P2085165	A_55_P2085165	0.0244403	0.00738695	0.0130787	0.0266084	0.0109444	0.012001	0.0204001	0.0155427	0.0125129	0.00765554	0.00854224	0.0272291
543	ERCC-00131_64	ERCC-00131_64	ERCC-00131_64	0.0077103	0.00735674	0.00719349	0.00699712	0.00998928	0.0100798	0.0091236	0.00827253	0.00820691	0.00762825	0.00850756	0.0100934
544	A_55_P2084152	NAP061298-1	NAP061298-1	0.0504072	0.0333743	0.0589042	0.0430248	0.0364007	0.0278799	0.0904602	0.0306591	0.0241669	0.0205652	0.0458527	0.0542591
545	A_30_P01027826	chr17:33372482-33375285_R	chr17:33372482-33375285_R	0.127636	0.116801	0.114489	0.116232	0.128808	0.124443	0.217051	0.116296	0.0711038	0.0774441	0.0976919	0.100445
546	A_55_P1974869	Hormad1	NM_001289537	0.00761188	0.00726965	0.00710975	0.00691743	0.00986982	0.144074	0.0120143	0.00817679	0.0100101	0.00754434	0.00840723	0.0100012
547	A_30_P01029261	chr14:22267795-22319045_R	chr14:22267795-22319045_R	0.00757982	0.00723971	0.0128194	0.00689392	0.0197026	0.0112228	0.00898397	0.0081452	0.00806699	0.00751876	0.0144805	0.0117008
548	A_30_P01028709	chr17:9898206-9919226_R	chr17:9898206-9919226_R	0.0483216	0.0409883	0.0322629	0.0349196	0.254249	0.0170602	0.0410251	0.0338761	0.0369015	0.0551389	0.0385017	0.0623904
549	A_30_P01029850	chr15:102920547-102933472_R	chr15:102920547-102933472_R	0.00751429	0.00872935	0.0196637	0.0231211	0.141369	0.0294715	0.00891588	0.0191268	0.00889162	0.00896907	0.0192264	0.00991847
550	A_30_P01019177	chr13:112648658-112719303_R	chr13:112648658-112719303_R	0.00748344	0.00715677	0.00918432	0.023403	0.022014	0.00978679	0.00888457	0.00805449	0.00796857	0.0074436	0.011438	0.00989357
551	A_30_P01026635	chr12:88251191-88252540_F	chr12:88251191-88252540_F	0.0074538	0.00712653	0.00697638	0.00679391	0.00967318	0.00975315	0.0120097	0.00802495	0.00793669	0.00950404	0.00825368	0.0098674
552	A_55_P2272563	4933416O17Rik	AK016836	0.00742329	0.00709959	0.00695073	0.00677022	0.0594137	0.00971574	0.00924058	0.00799606	0.0079053	0.00739072	0.00822518	0.00984237
553	A_52_P671676	Rasgrf1	NM_011245	0.106641	0.112527	0.718021	0.0890275	0.146037	0.102986	0.128349	0.120698	0.108131	0.0808504	0.073921	0.0608666
554	A_51_P102789	C1qc	NM_007574	2.68002	3.2975	3.53847	2.02392	1.51868	1.70776	1.64483	1.16027	1.97981	1.6538	1.51896	1.73201
555	A_55_P2055419	Arid4a	NM_001081195	0.361531	0.346201	0.41828	0.344037	0.401188	0.416754	0.3355	0.361269	0.341291	0.280457	0.333494	0.362266
556	A_30_P01022480	chr7:134595900-134610975_R	chr7:134595900-134610975_R	0.0109881	0.00699635	0.0113485	0.0125184	0.00949578	0.00957518	0.00870357	0.0091197	0.0077866	0.0197437	0.00811927	0.0119731
557	A_55_P1987064	A_55_P1987064	A_55_P1987064	0.00727995	0.00697229	0.00683373	0.00665531	0.00946292	0.0095428	0.00867617	0.00786241	0.00775877	0.00727609	0.00809781	0.00972995
558	A_55_P2149382	Gm3448	NM_001123367	0.243037	0.184128	0.176459	0.192543	0.182597	0.192233	0.237825	0.170756	0.20805	0.202937	0.193084	0.178814
559	A_30_P01019077	chr3:108763862-108772151_F	chr3:108763862-108772151_F	0.0461444	0.0229351	0.0413171	0.0477681	0.0369895	0.0568912	0.0380917	0.0469772	0.0205623	0.00723636	0.0184181	0.00969171
560	A_30_P01032336	chr2:60038543-60046318_F	chr2:60038543-60046318_F	0.100784	0.111075	0.0956114	0.115812	0.0895998	0.0983	0.101194	0.100831	0.0618891	0.0810401	0.0725249	0.105571
561	A_51_P129100	Sec63	NM_153055	0.764422	0.686006	0.691539	0.730982	0.620115	0.772644	0.676699	0.671557	0.674891	0.766268	0.748859	0.792828
562	A_55_P1958103	NAP102224-1	NAP102224-1	40.2767	45.1767	44.7539	39.7953	37.8541	40.7385	41.5051	35.7035	44.7201	45.8151	44.6151	44.1869
563	A_30_P01019598	chr14:105508625-105513462_R	chr14:105508625-105513462_R	0.638691	0.611892	0.641738	0.689651	0.677314	0.682016	0.607352	0.603328	0.654498	0.65773	0.638401	0.582361
564	A_30_P01018965	chr1:40113912-40114565_R	chr1:40113912-40114565_R	0.00710851	0.00682286	0.00669988	0.00652044	0.114234	0.109355	0.00851362	0.00770974	0.00759139	0.00714665	0.00796273	0.00961296
565	A_51_P141071	Cand2	NM_025958	0.215928	0.194097	0.237841	0.215431	0.292571	0.209628	0.262185	0.210405	0.157483	0.201609	0.244383	0.201432
566	A_66_P117450	Olfr1317	NM_146448	0.00706689	0.00678832	0.00666796	0.0064884	0.0372287	0.00930356	0.0208005	0.00767517	0.00755119	0.00711861	0.00793525	0.00958636
567	A_51_P261569	Fbxw26	NM_198674	0.00704741	0.00677147	0.012422	0.00647226	0.009192	0.067178	0.00846037	0.00765819	0.0078686	0.00710561	0.00792298	0.00957559
568	A_30_P01023352	chr3:41143423-41359623_R	chr3:41143423-41359623_R	0.0070285	0.00675591	0.00664308	0.00645821	0.00917138	0.0431037	0.0179148	0.00764316	0.00751455	0.00709303	0.00791181	0.00956561
569	A_52_P169595	Skint11	NM_177669	0.00701099	0.00674141	0.0171954	0.00644487	0.0461285	0.0092451	0.00886157	0.00817892	0.0135392	0.00708131	0.00790182	0.00955668
570	A_55_P1971398	NAP059536-1	NAP059536-1	0.0069943	0.00672736	0.0236153	0.00739945	0.0976668	0.00922852	0.00841697	0.00974101	0.00748373	0.00707064	0.00789303	0.00954886
571	A_51_P475138	Duox1	NM_001099297	0.033344	0.0270886	0.0492062	0.044795	0.0414011	0.0405077	0.0982295	0.0499469	0.0148161	0.0307388	0.0238396	0.0195337
572	A_66_P108178	Lin52	NM_173756	1.72911	1.61355	1.67037	1.75752	1.78293	1.8158	1.69939	1.70342	1.54864	1.63349	1.76199	1.61416
573	A_51_P462102	Gpr125	NM_133911	2.96802	3.19183	2.39827	3.36529	3.39416	2.94907	2.89008	3.0156	3.20433	3.38102	3.61406	3.26891
574	A_52_P282905	Ces1b	NM_001081372	0.00693631	0.00668173	0.00658557	0.00639041	0.00907334	0.00917523	0.00837668	0.00757415	0.00743363	0.00703758	0.0078703	0.00952857
575	A_52_P581326	Hcfc2	NM_001081218	0.366232	0.376223	0.324162	0.334237	0.373855	0.307168	0.331773	0.305019	0.358016	0.32511	0.288776	0.298513
576	A_55_P2081020	Gpr20	NM_173365	0.0771802	0.0695204	0.0910147	0.0931174	0.0596812	0.134611	0.178403	0.103939	0.0644658	0.0847678	0.0643189	0.0601191
577	A_51_P137168	Smarcal1	AF088884	2.09459	2.24788	2.20587	2.19012	2.32685	1.94795	2.31652	2.22411	2.35205	2.29206	2.33527	2.2362
578	A_30_P01018931	chr2:176610409-176612864_F	chr2:176610409-176612864_F	0.867156	0.77448	0.763858	0.792598	0.618595	0.820005	0.519746	0.815069	0.391865	0.496916	0.506337	0.890142
579	A_51_P108334	Slc25a4	NM_007450	152.01	150.613	121.334	159.056	155.43	151.725	152.879	144.602	168.097	174.947	155.314	177.908
580	ERCC-00109_120	ERCC-00109_120	ERCC-00109_120	0.012079	0.00664064	0.0165225	0.0247873	0.00902128	0.0308623	0.00835227	0.0156638	0.0103353	0.0140986	0.00787232	0.00952987
581	A_55_P2066737	A_55_P2066737	A_55_P2066737	0.0395586	0.0511567	0.0480153	0.0378856	0.0647575	0.0395469	0.0329719	0.0424626	0.0362583	0.0311414	0.0151815	0.00953388
582	ERCC-00120_69	ERCC-00120_69	ERCC-00120_69	0.00686723	0.0066346	0.006563	0.0063484	0.0122603	0.0262999	0.00835428	0.00975269	0.00738452	0.00701431	0.0078822	0.009539
583	A_66_P125209	Kif2c	NM_001290662	0.00794508	0.0168005	0.00844055	0.0131401	0.0270444	0.0391232	0.00835664	0.011395	0.00738373	0.00779147	0.0203816	0.009545
584	A_51_P104897	Itpr3	NM_080553	25.9022	24.8367	27.9636	26.3613	23.2261	22.3595	26.6671	27.1921	26.7157	23.4982	29.2366	22.9221
585	A_51_P253207	Slc51a	ENSMUST00000042042	0.531376	0.552229	0.441719	0.703713	0.541822	0.655918	0.987618	1.07406	1.14014	0.863698	0.511083	1.10446
586	A_30_P01023061	chr5:112539219-112540601_R	chr5:112539219-112540601_R	0.00685577	0.00663359	0.0107956	0.00824355	0.00901527	0.012349	0.00837262	0.00755113	0.00738626	0.00702362	0.00791803	0.00956902
587	A_55_P1975385	Dctn1	NM_007835	89.3479	95.3541	76.2001	96.8123	95.441	96.3946	92.3036	96.0209	97.6247	97.2278	96.3173	106.273
588	A_30_P01021748	chr2:157361470-157379813_F	chr2:157361470-157379813_F	0.00685498	0.0184772	0.00658604	0.00635318	0.00902312	0.107595	0.00838863	0.00756116	0.00739142	0.00703292	0.00793943	0.00958948
589	A_30_P01028040	chr3:146629425-146649125_F	chr3:146629425-146649125_F	39.6772	40.0063	27.6178	46.7822	47.0853	45.8019	41.0858	44.2672	46.076	52.0903	44.8695	52.7799
590	A_30_P01019706	chr13:112337405-112356455_R	chr13:112337405-112356455_R	0.0199704	0.00664465	0.0297656	0.0159994	0.169098	0.0508494	0.0604432	0.0183513	0.0252446	0.0427989	0.0248889	0.0259907
591	A_55_P2378129	D11Ertd80e	BM937886	0.0238823	0.0245218	0.00989215	0.0145702	0.0647588	0.0318536	0.0322591	0.0367922	0.0168196	0.0213676	0.0283584	0.00962925
592	A_66_P104814	Trak1	NM_175114	0.277166	0.214102	0.228919	0.246554	0.271917	0.307059	0.246148	0.230082	0.231475	0.245408	0.241017	0.276167
593	A_65_P14622	Gm13084	NM_001005371	0.00687069	0.00666246	0.0147931	0.00637972	0.0090636	0.176899	0.00844829	0.00760474	0.0132207	0.00707103	0.00801567	0.00965957
594	A_52_P61520	Nsun3	NM_178925	0.0132293	0.0106423	0.0306027	0.0289735	0.0316652	0.0295122	0.123232	0.0319294	0.0347921	0.0130554	0.0111923	0.0177305
595	3xSLv1	3xSLv1	3xSLv1	0.00688302	0.00667905	0.00665353	0.00639569	0.0131705	0.00923281	0.00848031	0.00762823	0.00744177	0.00708932	0.0080523	0.00969215
596	A_55_P2037162	Esyt1	AK044656	0.319561	0.275253	0.405224	0.312023	0.416172	0.278032	0.304803	0.415902	0.302911	0.331658	0.364308	0.283233
597	A_30_P01024721	chr8:122928924-122929556_R	chr8:122928924-122929556_R	0.332838	0.306926	0.32314	0.29848	0.358201	0.326772	0.342812	0.368993	0.223309	0.201223	0.193304	0.245692
598	ERCC-00073_60	ERCC-00073_60	ERCC-00073_60	0.00690783	0.00670638	0.00669436	0.00642477	0.0179747	0.00928042	0.00853504	0.00767029	0.0113946	0.00712481	0.0081132	0.00974861
599	A_51_P396917	Zfyve21	NM_026752	2.24896	2.33743	2.5226	2.21595	2.23066	2.23108	2.06812	1.86503	2.12633	2.43434	2.46708	1.89975
600	A_55_P1956832	Pip5k1b	NM_008846	0.00692828	0.0067293	0.00672655	0.00644764	0.00916431	0.00931742	0.00857626	0.00770384	0.00750204	0.00714992	0.00815864	0.00978852
601	A_55_P1994388	Lsm14a	NM_025948	3.61258	3.42665	3.56212	3.54284	3.48828	3.60264	3.58087	3.76603	3.50865	3.28484	3.62588	3.38976
602	A_52_P180826	Ndufaf7	NM_028611	5.01108	5.1997	4.51647	5.78655	5.62364	5.57678	5.30048	5.15721	5.61669	5.94693	5.72231	5.60467
603	A_30_P01029756	chr6:50339188-50409363_R	chr6:50339188-50409363_R	0.171332	0.147977	0.153031	0.172102	0.230715	0.137245	0.129537	0.184856	0.148684	0.153987	0.146109	0.177852
604	A_55_P2171993	Mrgbp	NM_028479	0.562522	0.466162	0.628353	0.491431	0.513565	0.432237	0.527667	0.424722	0.460448	0.412274	0.526563	0.348445
605	A_55_P2424060	Nrg3os	NR_045713	0.202707	0.161721	0.136539	0.17075	0.160482	0.194391	0.159951	0.166232	0.12801	0.165957	0.150198	0.152685
606	A_30_P01021083	chr8:49853937-49874087_F	chr8:49853937-49874087_F	0.00700542	0.00963561	0.00683015	0.00770968	0.0519129	0.0114739	0.00871907	0.011901	0.0085946	0.013956	0.0165696	0.0167949
607	A_30_P01030360	chr11:33414450-33450750_F	chr11:33414450-33450750_F	0.0785658	0.0691664	0.0688098	0.073282	0.144175	0.0586543	0.080596	0.0844278	0.0298164	0.062426	0.0562917	0.0639173
608	A_55_P2139889	Zfp783	NR_027963	0.502321	0.479615	0.625278	0.634896	0.75926	0.600191	0.561894	0.530039	0.568315	0.641455	0.636052	0.505743
609	A_66_P135804	A_66_P135804	A_66_P135804	43.8897	43.4816	41.0899	47.8838	44.4425	45.0007	45.2039	42.7182	43.5783	49.26	48.0927	50.3145
610	A_55_P2002743	NAP093099-001	NAP093099-001	0.0547931	0.0663156	0.0533616	0.06273	0.0544013	0.0561372	0.0289219	0.064878	0.0464444	0.0449072	0.0293189	0.0441244
611	A_51_P109835	Uqcrc1	NM_025407	11.0448	10.9853	10.0306	11.8007	10.7918	11.2393	10.3961	10.8734	10.6273	12.9138	11.2852	12.2112
612	A_30_P01025358	chr11:70196232-70203307_F	chr11:70196232-70203307_F	0.00710423	0.00690125	0.00694931	0.00662481	0.00943	0.0123047	0.00888389	0.00794006	0.00769786	0.00732613	0.0084617	0.010078
613	A_51_P249867	Snrnp48	NM_026382	1.47867	1.29502	1.38417	1.5617	1.53931	1.55769	1.63949	1.53255	1.73298	1.70667	1.62243	1.73671
614	ERCC-00168_248	ERCC-00168_248	ERCC-00168_248	0.00713719	0.00693092	0.0104796	0.00665899	0.00947425	0.0187378	0.008943	0.00823984	0.00773574	0.0171866	0.00851169	0.0101302
615	A_55_P2067321	Prune2	AK046830	0.270525	0.269749	0.197061	0.252926	0.332197	0.314357	0.260866	0.292466	0.269113	0.263773	0.273376	0.284071
616	A_30_P01023722	chr4:135896689-135918414_F	chr4:135896689-135918414_F	0.132284	0.0976439	0.108718	0.0920448	0.172064	0.174036	0.0780283	0.126244	0.0867676	0.0870933	0.0994043	0.0772279
617	A_55_P2178803	Zbtb5	NM_001163284	2.36306	2.39571	2.46309	2.37583	2.39254	2.36983	2.14355	2.47776	3.3198	1.9495	2.50698	3.19437
618	A_52_P683336	AY074887	NM_145229	0.032029	0.0240758	0.0388803	0.0380514	0.0333481	0.037242	0.0544245	0.0376179	0.0176615	0.0107195	0.0158432	0.0161788
619	A_55_P2143025	Sema3c	NM_013657	3.76743	3.80674	4.24312	2.9218	2.56301	2.83015	3.55387	3.71931	3.33115	2.66484	2.11058	2.58161
620	A_55_P2015832	Stmnd1	NM_001005422	0.0115523	0.00702194	0.10734	0.0139938	0.0125352	0.0223244	0.0234337	0.0146912	0.00783241	0.0257528	0.0193568	0.0102785
621	A_55_P2092310	Phgdh	AK195427	11.8024	11.6847	15.2227	12.1312	11.3839	11.7633	10.6332	13.2838	12.6136	11.9156	13.2842	11.4228
622	A_30_P01022686	chr5:149765314-149771786_R	chr5:149765314-149771786_R	0.102739	0.119557	0.0990271	0.135541	0.111561	0.108138	0.111044	0.106538	0.131619	0.123342	0.150332	0.11261
623	A_55_P2224830	D230044B12Rik	AK052079	1.08952	1.1069	1.12622	0.919839	0.965023	1.12913	0.818854	0.997069	1.18427	0.846145	1.12199	1.32164
624	A_55_P2031596	DV659360	DV659360	0.0073167	0.00707432	0.00718079	0.00681807	0.00971044	0.00988393	0.0570324	0.00819491	0.00788688	0.00747138	0.0087395	0.0103681
625	A_30_P01018995	chr18:77968421-77972209_R	chr18:77968421-77972209_R	0.0334103	0.0143733	0.0161739	0.044624	0.0290066	0.0439052	0.00924922	0.0263909	0.0245949	0.0275321	0.0310988	0.0313771
626	A_51_P111462	Arl15	NM_172595	3.08314	3.19853	2.4862	4.07123	3.98334	3.41974	3.97074	2.96029	4.21761	4.23714	3.53506	3.91716
627	A_55_P2039681	Gpr35	NM_022320	0.0132385	0.0128898	0.00722194	0.0167062	0.00976879	0.00994176	0.0288249	0.0229748	0.0234789	0.0337226	0.0087842	0.0104291
628	A_55_P2062632	Smc5	NM_001252684	4.27165	4.16089	4.29628	3.94021	4.31638	4.28146	4.13923	4.67695	4.23797	3.78295	4.32977	5.08775
629	ERCC-00116_142	ERCC-00116_142	ERCC-00116_142	0.00739615	0.00712207	0.00724606	0.00687914	0.00980271	0.0342028	0.00934151	0.00827719	0.00793357	0.0074925	0.00880688	0.0104629
630	A_55_P1968774	Ptk2b	NM_001162365	1.02794	0.985023	0.947448	0.975955	1.11802	1.0233	1.23518	0.980404	0.830581	0.887603	0.781924	1.01227
631	A_55_P1984481	Mfn2	NM_001285920	2.84077	2.5253	2.3138	2.61478	2.56419	2.98572	2.65572	2.71333	2.51763	2.68398	2.68398	2.87593
632	A_55_P2444515	Akap2	NM_001035532	1.08189	1.0886	1.21281	1.17309	1.16521	1.03465	1.35012	1.14827	1.21795	1.0779	1.05267	1.11539
633	A_66_P111430	2410006H16Rik	NR_030738	3.01153	3.64716	3.54311	3.10523	2.83471	3.14417	3.1251	2.95437	3.30498	3.52246	3.09835	3.00791
634	ERCC-00077_121	ERCC-00077_121	ERCC-00077_121	0.0122273	0.00714215	0.0072833	0.00691467	0.0708487	0.0100262	0.009427	0.00833152	0.00794364	0.00747461	0.00882921	0.0105232
635	A_52_P373666	Zfp174	NM_001081217	0.0739233	0.0639513	0.0438309	0.0572961	0.0646033	0.105287	0.0510431	0.0542056	0.062926	0.0679154	0.0691165	0.10171
636	A_30_P01026733	chr6:95418306-95424131_R	chr6:95418306-95424131_R	0.766426	0.790372	0.753157	0.721138	0.811859	0.838548	0.808757	0.791793	0.699664	0.748535	0.75188	0.678809
637	A_52_P258338	Mob3b	NM_178061	0.142464	0.150478	0.140753	0.13767	0.151582	0.126806	0.142168	0.14239	0.129578	0.10995	0.148606	0.106804
638	A_55_P2040810	A_55_P2040810	A_55_P2040810	0.00748632	0.0114393	0.0072809	0.00691755	0.0273328	0.0592498	0.0405629	0.00833873	0.00791667	0.00742818	0.00879503	0.0139402
639	A_51_P487933	Psmd7	NM_010817	9.50008	9.44219	8.73348	9.75358	10.3181	10.2712	9.53585	10.1061	10.5312	10.0784	10.0931	10.5556
640	A_51_P134923	Rnf148	NM_027754	0.0435986	0.0589145	0.0455731	0.0656822	0.143698	0.0524095	0.0549082	0.0642859	0.0252357	0.0460926	0.0185622	0.0229984
641	A_52_P98232	Hira	NM_010435	0.620877	0.624221	0.667181	0.660223	0.59869	0.668917	0.631884	0.611689	0.645113	0.682233	0.64433	0.533684
642	A_55_P1971679	A_55_P1971679	A_55_P1971679	0.0467241	0.0610276	0.0796769	0.0757134	0.0676456	0.0721351	0.069283	0.0844333	0.0551629	0.0476339	0.0316529	0.0435134
643	A_66_P108298	4632428C04Rik	NR_033631	0.00748716	0.0157689	0.00722723	0.028596	0.0320148	0.0127533	0.00949349	0.0123238	0.0308976	0.0210208	0.00868627	0.0297591
644	A_51_P440568	Stk19	NM_019442	1.61203	1.6518	1.51137	1.85451	1.70057	1.77693	1.71263	1.68579	1.69697	1.66982	1.51522	1.64519
645	A_51_P496845	Capza2	NM_007604	7.96057	8.20398	8.11612	8.68584	8.34223	8.901	8.81568	8.45984	8.57368	8.52615	7.83421	9.24369
646	A_55_P2071536	A_55_P2071536	A_55_P2071536	0.431059	0.603186	0.599766	0.653579	0.474808	0.675592	0.73066	0.484831	0.647765	0.497682	0.707541	0.717838
647	A_55_P2120254	Avpi1	NM_027106	11.2918	12.8629	12.0815	10.5024	9.77639	11.1052	11.6164	12.4888	11.8823	10.0861	9.76187	9.85347
648	A_55_P2036417	Lrrc10b	NM_001111140	0.150903	0.131777	0.0692718	0.119697	0.135932	0.0739827	0.115815	0.0864575	0.109715	0.0922697	0.057839	0.0625558
649	A_30_P01025334	chr15:61984389-62102500_R	chr15:61984389-62102500_R	0.00742073	0.0112959	0.00707231	0.00676069	0.00965853	0.0129152	0.00933841	0.00816696	0.00762194	0.0070671	0.00843225	0.0103766
650	ERCC-00075_180	ERCC-00075_180	ERCC-00075_180	0.00740135	0.00686296	0.00703855	0.00672892	0.00961836	0.00975045	0.00930466	0.00813369	0.00757785	0.00702063	0.00837819	0.0103426
651	A_55_P1958804	Hsd3b3	NM_001161742	0.00737977	0.00820787	0.0103912	0.00669595	0.00957441	0.00970169	0.00927207	0.00808775	0.00752856	0.00696144	0.00831715	0.01169
652	A_51_P255304	Cav3	NM_007617	0.00735215	0.0150927	0.0134538	0.0463046	0.016094	0.0379003	0.0777198	0.0305776	0.00872738	0.0305372	0.0373447	0.0399316
653	A_52_P136138	Fdft1	NM_010191	0.207225	0.18316	0.184777	0.215236	0.24822	0.13401	0.228426	0.14399	0.163158	0.155176	0.203098	0.163344
654	A_30_P01029361	chr5:108538417-108550517_F	chr5:108538417-108550517_F	0.00933702	0.00668442	0.0211829	0.0119945	0.00942	0.0168286	0.00914538	0.00796306	0.00735973	0.00926048	0.00810665	0.0101752
655	DarkCorner	DarkCorner	DarkCorner	0.00726356	0.00663048	0.00680121	0.00653322	0.00935383	0.00947521	0.00908917	0.0079105	0.00729946	0.00671267	0.00802668	0.010123
656	DarkCorner	DarkCorner	DarkCorner	0.00722855	0.00658012	0.00674306	0.00649108	0.00928867	0.00939849	0.00903339	0.00785453	0.00723269	0.00664165	0.00794889	0.0100664
657	DarkCorner	DarkCorner	DarkCorner	0.00754493	0.00703316	0.00687959	0.00642275	0.00974609	0.0213752	0.0090087	0.00810093	0.00810111	0.0074389	0.00879395	0.0105025
658	A_51_P184321	Aimp1	NM_007926	9.51629	10.3573	9.28731	10.3533	10.0622	10.7345	9.76858	9.27714	10.9324	11.1622	10.6382	10.9155
659	A_30_P01031250	chr2:94046243-94070067_F	chr2:94046243-94070067_F	0.0311662	0.0240476	0.0354666	0.0205809	0.04775	0.0123471	0.0429222	0.0398964	0.0135065	0.00817575	0.023286	0.016442
660	A_52_P383653	Cpne8	NM_001033851	2.37625	2.04083	1.59818	2.55893	2.27538	2.21184	2.31615	2.08139	2.52803	2.15974	2.10143	2.42974
661	A_66_P121924	A330043C09Rik	AK039441	0.0359689	0.00733575	0.0299339	0.031045	0.0101308	0.17051	0.016025	0.0103617	0.0110273	0.00770954	0.0120962	0.0106953
662	A_52_P545831	Tssc1	NM_201357	0.62543	0.591559	0.529079	0.888579	0.581256	0.769306	0.607949	0.506919	0.652119	0.652387	0.519324	0.726569
663	A_55_P2015410	0610010K14Rik	NM_001177601	14.105	15.6461	14.2462	13.099	14.0042	15.5799	13.5274	12.8118	13.9377	15.1768	15.5067	14.3466
664	A_55_P2112235	Cdk5rap2	NM_145990	0.207651	0.19766	0.162469	0.151821	0.141764	0.20012	0.153023	0.195344	0.167982	0.167622	0.223442	0.179619
665	A_51_P115178	Scara3	NM_172604	0.635904	0.554251	0.703966	0.522586	0.631845	0.432802	0.535766	0.583871	0.432354	0.405207	0.473098	0.371901
666	A_51_P313761	Shmt2	NM_028230	1.12448	1.07461	1.19672	1.04825	1.20662	1.15683	1.0766	1.11292	1.23563	1.31948	1.12205	1.19843
667	A_30_P01022341	chr4:147105275-147171025_F	chr4:147105275-147171025_F	0.176024	0.183238	0.12211	0.129703	0.245669	0.236026	0.145137	0.115209	0.189807	0.0818941	0.0674083	0.0708958
668	A_30_P01028502	chr9:24292762-24307562_R	chr9:24292762-24307562_R	0.0081885	0.00770731	0.00820795	0.0071376	0.0523986	0.0696158	0.0240034	0.00931859	0.016279	0.00804347	0.00932964	0.010884
669	A_51_P302139	Mastl	NM_025979	0.0516437	0.0822886	0.0881684	0.0797651	0.065145	0.0486494	0.127149	0.0930831	0.0698225	0.0416835	0.0513414	0.0584313
670	A_55_P2115832	Rbmy	NM_011253	0.00825264	0.00777998	0.0110292	0.00939619	0.0416814	0.0111469	0.00978498	0.00883054	0.0088533	0.00810195	0.0093713	0.0109045
671	A_30_P01027171	chr9:100977450-100989325_F	chr9:100977450-100989325_F	0.0504439	0.0224979	0.0301257	0.0239318	0.0709119	0.0111642	0.015676	0.0271345	0.028133	0.0235809	0.0398829	0.010913
672	A_30_P01025577	chr6:99472981-99484210_R	chr6:99472981-99484210_R	0.127043	0.101302	0.0729739	0.104059	0.0703402	0.093763	0.106695	0.0878099	0.107718	0.134672	0.137893	0.0778867
673	A_51_P115626	Shank3	NM_021423	0.355057	0.471241	0.332285	0.441003	0.516137	0.418834	0.36286	0.465228	0.410368	0.426205	0.47953	0.418098
674	A_55_P2045380	A_55_P2045380	A_55_P2045380	0.169465	0.133796	0.160691	0.186416	0.157567	0.150493	0.234162	0.182088	0.188046	0.0889679	0.112778	0.170876
675	A_55_P2116310	Trim45	NM_001165952	0.0205617	0.00826889	0.0165528	0.00752994	0.118403	0.0111869	0.00988506	0.0113415	0.0220656	0.00819583	0.0203973	0.0109144
676	A_55_P2005555	Celf2	NM_001110229	0.862433	0.736742	0.943347	0.734624	0.872013	0.754977	0.762036	0.81419	0.838781	0.78265	0.987131	0.83042
677	A_55_P1981739	Donson	NM_021720	1.85006	2.06539	2.02797	1.96321	2.00354	2.04385	1.87963	1.82765	1.99754	1.67848	2.13622	1.80066
678	A_55_P2021953	Olfr700	NM_146600	0.274141	0.229864	0.210432	0.252914	0.464602	0.293167	0.241968	0.268477	0.129628	0.137001	0.135196	0.154857
679	A_55_P2227178	AI317158	BQ554617	0.0083778	0.00793056	0.0077577	0.00742223	0.0910841	0.119358	0.10123	0.00895045	0.00896428	0.00821837	0.00938196	0.0108777
680	A_55_P1989956	Lphn2	NM_001081298	0.0194461	0.0379686	0.0221649	0.0430304	0.0504233	0.0374152	0.062101	0.036881	0.0384847	0.0329702	0.020914	0.0478561
681	A_30_P01031167	chr9:58197113-58200614_F	chr9:58197113-58200614_F	0.18714	0.188411	0.161716	0.130127	0.435768	0.140067	0.154773	0.163603	0.0986709	0.0945892	0.0917121	0.111649
682	A_30_P01028969	chr3:125561319-125562132_F	chr3:125561319-125562132_F	0.00836626	0.00792922	0.00775511	0.00899547	0.0108219	0.011095	0.00987889	0.00893681	0.00894577	0.00821027	0.00933567	0.0151957
683	A_51_P372172	Plod3	NM_011962	2.81891	2.73829	2.93562	2.80432	2.48405	2.57444	2.94582	2.98289	3.02885	3.02084	2.84244	2.71488
684	A_55_P2048980	Stxbp5l	NM_172440	1.25182	1.26264	1.24214	1.40039	1.35138	1.59065	1.24124	1.29052	1.1862	1.4109	1.52109	1.30548
685	A_55_P2024327	Suv420h2	NM_146177	5.67389	5.9107	6.26867	6.57558	6.32709	6.77321	6.1723	6.7716	6.66965	5.64194	6.16594	5.9648
686	A_55_P2159299	Ing1	NM_011919	2.15921	2.32431	2.7749	2.28871	2.35658	2.31472	2.19624	2.5633	2.66486	2.1545	2.38302	2.2146
687	A_52_P533198	Dnajc2	NM_009584	1.41463	1.48947	1.60592	1.43954	1.6402	1.53539	1.6545	1.61728	1.69762	1.58493	1.44854	1.79588
688	A_30_P01017767	chr2:83540813-83541273_R	chr2:83540813-83541273_R	0.00828405	0.00786588	0.00769305	0.00741493	0.0601545	0.0109183	0.00977471	0.00884911	0.00884418	0.00813388	0.00918976	0.0229166
689	A_55_P2132697	LOC102633858	XR_389816	0.147014	0.220141	0.174916	0.139665	0.169448	0.14618	0.162076	0.128113	0.133688	0.192918	0.149402	0.160962
690	A_55_P2103452	Npy1r	NM_010934	2.08568	3.01336	3.73036	2.94477	2.01167	2.39536	6.27653	6.02543	5.78137	2.51286	2.96404	2.61654
691	A_30_P01033218	chr6:100514596-100520846_R	chr6:100514596-100520846_R	0.0707996	0.0438748	0.0651995	0.0782508	0.192541	0.0735022	0.0767273	0.0618655	0.0300913	0.051584	0.0305615	0.0576019
692	A_55_P2100065	Fsd1l	NM_176966	0.944692	0.943899	0.839606	0.975134	0.992058	1.0199	1.01451	0.983063	1.01832	0.916155	0.925819	1.05437
693	A_30_P01030585	chr1:160888257-160910594_R	chr1:160888257-160910594_R	0.0526727	0.0215279	0.0678298	0.0220986	0.0259416	0.337135	0.248104	0.105962	0.0551597	0.0179407	0.0181269	0.0258374
694	A_55_P2217598	D10Ertd755e	AK080282	0.144702	0.139466	0.145752	0.173559	0.157471	0.248298	0.1445	0.130294	0.157637	0.13293	0.152434	0.141765
695	A_30_P01021300	chr13:94069868-94070007_R	chr13:94069868-94070007_R	0.0920994	0.0876232	0.0902155	0.105893	0.0765328	0.101049	0.207565	0.0794365	0.0564095	0.047157	0.0550851	0.0578124
696	A_51_P198411	Grb2	NM_008163	15.3089	16.3815	15.4743	16.1323	15.1372	16.3605	16.7094	17.4859	16.8378	17.5993	17.303	16.8382
697	A_55_P2053372	Rbfox3	NM_001285436	6.02101	6.10403	4.39464	6.98338	6.49746	6.84059	6.06644	5.77248	6.60014	7.96457	6.89442	6.97762
698	A_51_P129317	Mob4	NM_025283	7.77838	7.97821	7.56731	8.42408	7.32933	6.81332	7.89451	7.37515	8.57733	7.61747	7.07634	7.41704
699	A_66_P101835	Cd38	NM_007646	0.369153	0.327125	0.474677	0.35541	0.381473	0.334016	0.529714	0.342161	0.260702	0.208396	0.227796	0.217328
700	A_30_P01026223	chr17:86219507-86220112_F	chr17:86219507-86220112_F	0.00796514	0.00758439	0.00930726	0.00878913	0.0400427	0.0117247	0.00940444	0.00852213	0.00848287	0.00785145	0.00878506	0.0257068
701	A_30_P01022804	chr7:134369091-134376468_F	chr7:134369091-134376468_F	1.87611	1.64343	1.61351	1.71839	1.77683	1.77862	1.78773	1.71669	1.30911	1.19964	1.2772	1.50511
702	A_55_P2113758	Gria1	NM_001113325	0.216036	0.267906	0.423478	0.211267	0.309269	0.104457	0.256479	0.216829	0.100889	0.191645	0.262836	0.283485
703	A_52_P424767	Rbbp4	NM_009030	0.178291	0.17564	0.226987	0.179415	0.161163	0.160805	0.114628	0.161531	0.132671	0.16208	0.189691	0.0567451
704	A_66_P107174	AK079976	AK079976	0.774217	0.714991	0.755103	0.667024	0.706722	0.765104	0.974783	0.746833	0.715908	0.668643	0.620098	0.864323
705	A_51_P114616	Batf	NM_016767	0.0345634	0.10056	0.0735204	0.0720127	0.0436792	0.0412467	0.11089	0.0421319	0.0626951	0.0418022	0.0556943	0.039128
706	A_55_P2046910	A_55_P2046910	A_55_P2046910	0.0549349	0.0334548	0.0540473	0.042574	0.0559016	0.0450818	0.0467645	0.0466572	0.0370992	0.0354828	0.0405564	0.0272426
707	A_55_P1997145	Nlrx1	NM_001163743	0.722696	0.621154	0.654786	0.721994	0.723477	0.694996	0.684489	0.701658	0.623304	0.664988	0.692076	0.649704
708	ERCC-00013_180	ERCC-00013_180	ERCC-00013_180	0.0117789	0.0147273	0.0245674	0.00699461	0.0155438	0.010067	0.00939037	0.00826251	0.00820048	0.00762748	0.0143272	0.010085
709	A_55_P2168321	NAP114507-1	NAP114507-1	0.583344	0.618599	0.551903	0.658965	0.633683	0.708675	0.68279	0.630028	0.724488	0.53991	0.602391	0.583625
710	A_30_P01031758	chr15:83181291-83197750_R	chr15:83181291-83197750_R	0.347811	0.25406	0.208355	0.329214	0.446886	0.639665	0.498156	0.284977	0.289059	0.282014	0.362535	0.423495
711	A_30_P01030078	chr1:138499609-138502045_R	chr1:138499609-138502045_R	0.258749	0.224966	0.206195	0.26154	0.226706	0.445416	0.248358	0.234288	0.120959	0.0899004	0.105523	0.152662
712	A_30_P01031590	chr3:18521534-18522194_R	chr3:18521534-18522194_R	0.0075732	0.00723108	0.00707735	0.0115785	0.00981954	0.0201957	0.00897576	0.0081354	0.00806208	0.00751739	0.0168585	0.0105733
713	A_55_P2054097	Gm7697	XM_006544458	0.0075404	0.00720229	0.00705022	0.00686567	0.0781442	0.00985811	0.00894222	0.00810483	0.00802875	0.0118232	0.00833702	0.0102117
714	A_55_P2013499	A_55_P2013499	A_55_P2013499	0.00750926	0.00717409	0.00702364	0.00684028	0.0792878	0.00981842	0.00890901	0.00807433	0.00799577	0.00746467	0.00830607	0.00991557
715	A_30_P01031900	chr1:107885386-107886798_R	chr1:107885386-107886798_R	0.0194204	0.00714662	0.00699576	0.0116406	0.00970066	0.0097776	0.00887677	0.00804484	0.00796256	0.00743942	0.00827654	0.00989134
716	A_30_P01033650	chr7:134369091-134376366_R	chr7:134369091-134376366_R	0.452396	0.3063	0.423323	0.317763	0.417337	0.37318	0.189482	0.42861	0.360159	0.215101	0.483242	0.27311
717	A_30_P01028712	chr8:49853937-49874087_F	chr8:49853937-49874087_F	0.0368158	0.0212572	0.0248182	0.0149365	0.090708	0.0261439	0.00881348	0.0235208	0.0262577	0.0272376	0.0310201	0.0337982
718	A_55_P1970693	A_55_P1970693	A_55_P1970693	0.00738782	0.00706548	0.00692202	0.00674247	0.0756426	0.00966786	0.146607	0.00795875	0.00786956	0.00736513	0.00819205	0.0098153
719	A_30_P01032260	chr3:26986265-26986767_F	chr3:26986265-26986767_F	0.00735852	0.00703918	0.00689811	0.0067193	0.0817321	0.0154666	0.306407	0.00793173	0.0078397	0.00734196	0.00816708	0.00979234
720	A_30_P01027750	chr9:56654505-56654959_R	chr9:56654505-56654959_R	0.00732991	0.00701078	0.00687465	0.00669504	0.00952358	0.00959858	0.00872459	0.00790506	0.00781084	0.00811131	0.00814135	0.00977039
721	(+)E1A_r60_a107	E1A_r60_a107	E1A_r60_a107	0.27749	0.20855	0.253751	0.178798	0.300828	0.186669	0.213242	0.221047	0.337699	0.202515	0.236864	0.395043
722	A_51_P118763	Ahctf1	NM_026375	0.530424	0.5827	0.62097	0.572859	0.599252	0.546312	0.509864	0.536906	0.582715	0.553604	0.525459	0.45778
723	A_51_P378576	B3gnt7	NM_145222	0.00767793	0.00799211	0.0231446	0.0301894	0.0206254	0.0589778	0.0306308	0.00783038	0.0206273	0.0184432	0.0185215	0.0221038
724	A_30_P01021682	chr5:110964854-110965222_F	chr5:110964854-110965222_F	0.00722324	0.00774463	0.0138394	0.00661074	0.00939525	0.0127409	0.017901	0.0212269	0.00770321	0.00723667	0.00805195	0.00969044
725	A_30_P01033450	chr13:90247709-90253992_R	chr13:90247709-90253992_R	0.00719821	0.00689812	0.00676962	0.00659091	0.00936504	0.0781021	0.0466715	0.00778478	0.00767867	0.00721782	0.00953146	0.00967281
726	A_55_P2142695	E330014E10Rik	NM_001122668	0.00717396	0.00687696	0.00675061	0.00657189	0.00933765	0.08593	0.149541	0.00776332	0.00765502	0.00720001	0.00801356	0.0271955
727	A_55_P2253279	TC1743885	TC1743885	0.00715081	0.00685678	0.0067327	0.00655332	0.0093105	0.00939066	0.0108875	0.00774279	0.00763156	0.00718235	0.00799592	0.00964048
728	A_30_P01022605	chr11:96112907-96125798_F	chr11:96112907-96125798_F	0.0948007	0.0811697	0.126576	0.110525	0.359851	0.297712	0.0866525	0.0590829	0.0813529	0.119422	0.116684	0.109101
729	A_30_P01032129	chr6:5311375-5328075_R	chr6:5311375-5328075_R	0.0200851	0.0224398	0.0238222	0.00828301	0.130037	0.0505919	0.175844	0.0376481	0.00758922	0.0154574	0.00835121	0.00961171
730	A_66_P107256	Kcna10	NM_001081140	0.0356514	0.0231202	0.0193754	0.0345877	0.133834	0.0546346	0.11644	0.0318455	0.0256798	0.0544142	0.0322461	0.019708
731	A_52_P502849	ENSMUST00000103401	ENSMUST00000103401	0.00706593	0.0089405	0.00667056	0.00648769	0.00952771	0.00929773	0.0150903	0.00767034	0.00755083	0.00899073	0.00999543	0.0144991
732	A_30_P01030287	chr15:77575125-77585575_F	chr15:77575125-77585575_F	0.296077	0.322069	0.306514	0.295057	0.313198	0.40106	0.306691	0.31879	0.206787	0.224163	0.203058	0.262689
733	A_55_P2156370	BB014433	NR_037972	0.18122	0.126294	0.165596	0.152679	0.239692	0.156579	0.228697	0.169555	0.193323	0.122833	0.145639	0.179716
734	A_30_P01025804	chr11:68200716-68214458_F	chr11:68200716-68214458_F	0.00701066	0.0127943	0.00663291	0.00644602	0.116893	0.00924214	0.0138392	0.00762655	0.00750218	0.00708409	0.00790466	0.00955951
735	A_51_P209518	Galnt1	NM_013814	1.01622	1.01167	1.11408	1.02403	0.861337	0.920503	1.02142	0.862694	1.01637	0.862727	1.007	0.88857
736	A_51_P353592	Commd4	NM_025417	5.01783	5.20677	4.56952	5.17473	5.47116	5.27525	5.53157	5.08571	5.51625	5.97209	5.38763	5.25465
737	A_30_P01030147	chr1:193875525-193978800_R	chr1:193875525-193978800_R	0.209653	0.164198	0.1975	0.199317	0.198159	0.200763	0.299467	0.197742	0.200451	0.197411	0.182742	0.200949
738	A_55_P2183940	Olfr47	NM_146370	0.112375	0.0631634	0.0909744	0.0785348	0.0892609	0.0841641	0.0814177	0.122458	0.0619425	0.0386455	0.0474854	0.0636794
739	ETG08_142674	ETG08_142674	ETG08_142674	0.00693919	0.00668203	0.00658934	0.00639315	0.00907743	0.00917631	0.00837818	0.00757417	0.007439	0.00704105	0.00787669	0.00953412
740	A_30_P01027500	chr8:124355710-124401160_R	chr8:124355710-124401160_R	0.24063	0.30339	0.103236	0.20193	0.143123	0.261589	0.398977	0.20026	0.227596	0.243077	0.176458	0.106001
741	A_55_P2044627	Rnase10	NM_029145	0.635656	0.502252	0.611572	0.546649	0.572771	0.664323	0.672045	0.643618	0.603328	0.585609	0.720222	0.626418
742	A_30_P01024111	chr3:68867193-68876128_F	chr3:68867193-68876128_F	0.00690809	0.006659	0.00681783	0.00637213	0.00904771	0.0154849	0.0394964	0.00755571	0.0216664	0.00703024	0.0078751	0.00953097
743	A_55_P1958961	A_55_P1958961	A_55_P1958961	0.478902	0.405767	0.506685	0.426001	0.586951	0.56789	0.527516	0.52368	0.509875	0.53702	0.518986	0.537221
744	A_52_P668478	Rhbdd2	NM_146002	0.238858	0.22824	0.206292	0.271531	0.284083	0.282995	0.278125	0.273439	0.210213	0.243194	0.259188	0.320436
745	A_55_P2098609	Spag16	AK016352	0.0161802	0.0188826	0.0311313	0.00635904	0.0149721	0.0862635	0.0128972	0.0539253	0.0282369	0.0208871	0.0218645	0.0384871
746	A_55_P2076861	Sema6d	NM_001291000	0.250532	0.227562	0.238976	0.24202	0.222842	0.258352	0.274228	0.230366	0.270374	0.235893	0.265116	0.255913
747	A_30_P01032677	chr8:83210957-83219451_F	chr8:83210957-83219451_F	0.0187477	0.0209233	0.049588	0.0210627	0.0390357	0.155863	0.00971364	0.0129816	0.0278483	0.0153596	0.0226358	0.00954832
748	A_30_P01025386	chr15:101084597-101095097_R	chr15:101084597-101095097_R	0.0957225	0.117228	0.139738	0.113295	0.164693	0.135945	0.205126	0.126972	0.0916315	0.0965251	0.0672432	0.0863669
749	A_51_P101075	Cnppd1	NM_026977	17.614	18.588	18.0509	19.4819	17.2543	17.0838	18.4686	17.8611	18.7966	19.4973	19.589	18.9366
750	A_51_P102518	Tmem225	NM_029379	0.0337817	0.0255576	0.0599067	0.0391182	0.0394923	0.046447	0.0285437	0.0167557	0.0275023	0.0129246	0.0338676	0.0278034
751	A_55_P2058557	Dnajb5	ENSMUST00000084662	0.103192	0.0759137	0.0899882	0.0759508	0.0893543	0.201663	0.0767234	0.099796	0.0837175	0.0745659	0.0724394	0.0776011
752	A_55_P2068096	Rap1gap	AK078677	9.17816	9.22741	8.13799	10.7812	9.68312	8.48765	8.90274	9.05238	9.81906	10.4403	10.1453	9.51649
753	A_55_P2007510	Pef1	NM_026441	29.1929	29.1133	23.7787	30.7731	28.0615	29.0354	28.4973	28.012	31.4	31.6912	28.8479	34.5924
754	A_55_P2101431	Mrps25	NM_025578	0.509732	0.494299	0.539947	0.471122	0.680943	0.614577	0.551373	0.570537	0.502445	0.453739	0.499696	0.556752
755	A_51_P113205	F13b	NM_031164	0.00687138	0.00665461	0.00829415	0.00637157	0.14333	0.00918236	0.00959592	0.0106815	0.0074173	0.0070615	0.00798674	0.0188939
756	A_51_P211765	Rin1	NM_145495	0.137896	0.120836	0.207956	0.0609913	0.0713502	0.0877446	0.104305	0.117428	0.0942999	0.0290372	0.0244143	0.0129197
757	A_55_P2105878	Ccr10	NM_007721	0.2004	0.204393	0.236216	0.2958	0.234123	0.536503	0.230701	0.315532	0.190745	0.297649	0.227588	0.291577
758	A_55_P1955847	TC1728395	TC1728395	0.00688556	0.00667271	0.00664393	0.00639128	0.00908182	0.121332	0.0382556	0.00761721	0.00744094	0.00708722	0.0080351	0.0096738
759	A_55_P2012702	Kcnh4	NM_001081194	0.00689176	0.00668042	0.00665604	0.00639946	0.0195377	0.0170285	0.0635085	0.00762894	0.0074504	0.00709702	0.00805529	0.00969151
760	A_30_P01022291	chr7:7075114-7089895_F	chr7:7075114-7089895_F	0.00689883	0.00668913	0.0117358	0.0124823	0.0680708	0.00924695	0.0171767	0.023249	0.00746066	0.00710772	0.00807337	0.00970836
761	A_30_P01023888	chr17:39960567-39992817_F	chr17:39960567-39992817_F	25.9147	17.9764	22.032	19.3495	21.0284	20.4608	22.7561	22.8678	20.8311	23.6199	23.0582	26.9847
762	A_55_P2120897	LOC102639179	XR_397594	0.00691549	0.00670846	0.00977497	0.012987	0.00913629	0.00927989	0.0085323	0.0076689	0.00748347	0.00713078	0.011055	0.0133496
763	A_55_P2122619	Asb11	NM_026853	0.0142656	0.0135155	0.0250522	0.0114584	0.0855875	0.0141857	0.0230773	0.0252062	0.0332955	0.0191486	0.0327768	0.00976595
764	A_55_P1953663	Stk4	AK030098	0.00693528	0.00673039	0.00672611	0.00645024	0.00916918	0.00931659	0.00857276	0.00770039	0.00750911	0.00715574	0.00815932	0.00978669
765	A_55_P1983553	AF529169	NM_153509	0.975253	1.13009	0.818425	1.38558	1.2376	1.43749	0.928157	1.55628	1.09251	1.10019	1.29952	1.48195
766	A_55_P2007464	ENSMUST00000169678	ENSMUST00000169678	84.6352	89.0519	85.1174	77.506	81.8751	78.4921	87.1874	79.6747	87.9939	93.0375	82.1149	89.3277
767	A_30_P01020897	chr10:92550314-92577555_R	chr10:92550314-92577555_R	0.00697019	0.00676779	0.00677567	0.00648842	0.00922459	0.0232783	0.0304513	0.00775263	0.00755244	0.00719676	0.0082303	0.00985234
768	A_55_P2151672	ENSMUST00000050391	ENSMUST00000050391	1.34543	1.32912	1.19817	1.47242	1.49906	1.46181	1.44053	1.45525	1.47305	1.35825	1.38585	1.5018
769	A_30_P01024612	chr7:118248833-118267766_R	chr7:118248833-118267766_R	0.0536529	0.0411925	0.064219	0.0602223	0.0846233	0.0723343	0.0564193	0.081272	0.0381097	0.00722703	0.0352212	0.0519163
770	A_30_P01020457	chr9:118291593-118324230_F	chr9:118291593-118324230_F	0.0465348	0.0579674	0.0400202	0.0390026	0.0898165	0.0552542	0.0346224	0.0699091	0.0224497	0.0183115	0.0364617	0.0155377
771	A_52_P622230	Gm4890	NR_045822	0.0229842	0.00880828	0.0155642	0.0176125	0.0605194	0.0168777	0.0107998	0.0391944	0.0127602	0.0269003	0.016226	0.00994496
772	A_55_P2236622	AK081327	AK081327	0.151441	0.134323	0.157756	0.130768	0.133116	0.16996	0.0623548	0.15326	0.149517	0.0876661	0.136858	0.141791
773	A_66_P139497	ENSMUST00000069051	ENSMUST00000069051	0.00705771	0.00685438	0.00688863	0.00657776	0.00935624	0.00951728	0.00879372	0.00787326	0.0115335	0.00728726	0.00838472	0.00999788
774	A_55_P1952212	ENSMUST00000103452	ENSMUST00000103452	0.00707407	0.0068699	0.00690868	0.00857357	0.0093801	0.0660242	0.0136178	0.00789471	0.00766965	0.00730298	0.0084108	0.011245
775	A_52_P154858	A730049H05Rik	AK043032	0.0517112	0.0447756	0.0216687	0.0526336	0.0585534	0.0388603	0.059234	0.0398269	0.0624851	0.0489905	0.0718006	0.0277922
776	A_30_P01026678	chr7:49715933-49771497_F	chr7:49715933-49771497_F	0.00710794	0.00690147	0.00694929	0.0066268	0.00942904	0.00959321	0.0088781	0.0079389	0.00770562	0.00733337	0.0084639	0.0100749
777	(+)E1A_r60_a135	E1A_r60_a135	E1A_r60_a135	0.334619	0.344705	0.333727	0.306125	0.234378	0.267601	0.347266	0.395163	0.331666	0.335603	0.403483	0.490774
778	A_55_P1963758	Odam	NM_027128	0.00714346	0.00802995	0.00699046	0.00666097	0.00947846	0.00964451	0.00893553	0.00798328	0.00774179	0.00892674	0.00851617	0.0101264
779	A_55_P2022187	Arvcf	XM_006536859	0.285435	0.333542	0.311191	0.269504	0.439958	0.338014	0.28134	0.372576	0.229818	0.194523	0.207994	0.201145
780	A_55_P1967855	Kctd20	NM_025888	4.57679	4.86668	3.7592	4.96358	4.46918	4.69943	4.8148	4.22521	5.15412	5.04014	4.7529	4.88824
781	A_55_P2009064	Psmc1	NM_008947	25.7996	25.3411	22.8467	25.8672	24.0529	25.8887	25.0678	24.9659	26.5663	26.9631	25.8093	28.1678
782	A_52_P413394	Ppef2	NM_011148	0.025292	0.0234086	0.029994	0.0354076	0.0842624	0.0519662	0.0488538	0.0360246	0.0273891	0.0158195	0.0200756	0.0279134
783	ERCC-00039_95	ERCC-00039_95	ERCC-00039_95	0.0112958	0.00701203	0.0112283	0.00674506	0.0178738	0.00977167	0.0113842	0.00809463	0.00952922	0.00743283	0.00864077	0.0102538
784	A_52_P574190	Psmd12	NM_025894	29.328	30.7376	25.9488	33.0571	31.5065	31.6758	30.4518	26.6441	31.2055	33.8454	29.3416	31.8195
785	A_30_P01032179	chr6:121037952-121038370_R	chr6:121037952-121038370_R	0.0291202	0.0105478	0.0380898	0.0223325	0.0096512	0.0142036	0.0106575	0.0280516	0.00785872	0.0188428	0.00868627	0.0235737
786	A_51_P118132	Skil	NM_011386	0.602096	0.763977	0.979187	0.623438	0.592904	0.705048	0.729571	0.729847	0.622082	0.672068	0.678795	0.722739
787	A_55_P1982454	Eps8	NM_007945	0.857498	0.820019	1.26053	0.687464	0.650762	0.710554	0.754389	0.733631	0.775025	0.563319	0.613542	0.515542
788	A_30_P01017856	chr8:40072950-40088400_F	chr8:40072950-40088400_F	0.0194216	0.0130337	0.013751	0.0190054	0.0167429	0.0137401	0.0235663	0.0319321	0.00790128	0.007486	0.00874765	0.0150726
789	A_30_P01018682	chr18:54122285-54122917_F	chr18:54122285-54122917_F	0.211119	0.16443	0.180616	0.178186	0.192538	0.187561	0.279059	0.188801	0.142079	0.15726	0.175657	0.143429
790	A_55_P1954608	Lekr1	NM_001037923	0.154051	0.125998	0.148032	0.167226	0.186237	0.128764	0.167399	0.166344	0.143365	0.138651	0.171662	0.104985
791	A_30_P01026564	chr10:118427606-118430070_R	chr10:118427606-118430070_R	0.00737734	0.00711508	0.0105212	0.0103695	0.00978064	0.0156603	0.0337442	0.0183034	0.00984499	0.00750495	0.0107943	0.0167502
792	A_55_P2120080	Zmynd11	ENSMUST00000137932	0.752232	0.74501	0.91629	0.693663	0.655885	0.677954	0.755963	0.65382	0.678868	0.643694	0.783059	0.613851
793	A_51_P511375	Ranbp2	NM_011240	2.82816	3.10922	2.72971	3.11774	3.15116	3.00696	2.95159	3.02036	3.18143	3.14049	2.73697	3.34434
794	A_51_P163354	Ogdhl	NM_001081130	0.12242	0.104457	0.102302	0.103931	0.118752	0.13391	0.271225	0.0881607	0.0866945	0.113463	0.109131	0.122026
795	A_66_P102395	Elac2	AF308696	0.917679	0.792508	0.753034	0.901865	0.834533	0.788473	0.847387	0.816454	0.735185	0.902776	0.723202	0.781942
796	A_55_P2036377	A_55_P2036377	A_55_P2036377	76.0541	79.5259	77.4007	73.3051	77.3385	76.8503	81.4256	67.9653	82.94	81.4615	75.4496	83.9241
797	A_55_P1992640	Hdac3	NM_010411	1.52499	1.76619	1.57457	1.89369	1.71386	1.8843	1.66989	1.85426	1.76794	1.96232	2.01153	1.94101
798	A_30_P01026851	chr5:118919606-118925333_R	chr5:118919606-118925333_R	0.0251224	0.00951205	0.0146834	0.0304088	0.0470621	0.0241133	0.0357859	0.0102031	0.0079689	0.024241	0.00884874	0.0105351
799	A_55_P2060188	Hira	ENSMUST00000120532	0.613977	0.543048	0.468697	0.667252	0.595708	0.652691	0.622174	0.530825	0.595094	0.505878	0.729161	0.621978
800	A_30_P01031852	chr17:8088950-8106700_R	chr17:8088950-8106700_R	0.0565143	0.0519007	0.053807	0.0712501	0.0462346	0.0710702	0.0430204	0.0412668	0.0182328	0.0192008	0.0193699	0.0208928
801	A_52_P294514	Samt4	NM_029199	0.00749834	0.00715145	0.00730171	0.00693621	0.00989202	0.0100514	0.00946867	0.00835541	0.00795545	0.0074687	0.00883511	0.0105547
802	A_55_P2143095	LOC102634533	XR_388308	0.464995	0.472372	0.540142	0.503405	0.341022	0.383142	0.410127	0.301967	0.400839	0.371063	0.463226	0.336666
803	A_55_P2054225	Camsap2	NM_001081360	0.47241	0.495923	0.466343	0.527311	0.479258	0.615352	0.491657	0.496898	0.531672	0.492965	0.511135	0.442457
804	A_55_P1988907	Eml4	NM_001114361	1.75835	1.78398	1.76576	2.09109	2.05539	2.08746	2.12219	2.27208	2.16724	1.88745	2.11664	2.14627
805	ERCC-00126_533	ERCC-00126_533	ERCC-00126_533	0.0239581	0.0359347	0.0214104	0.0522615	0.153089	0.016025	0.0614757	0.0467565	0.0158046	0.0255021	0.0124346	0.0200253
806	A_52_P512329	Zfp219	NM_027248	0.444273	0.420783	0.563122	0.474533	0.452846	0.426378	0.499597	0.521433	0.402001	0.46135	0.446812	0.341482
807	A_55_P2151762	Atg7	NM_001253717	0.262049	0.273739	0.229206	0.302077	0.244087	0.271831	0.234302	0.250531	0.288379	0.274402	0.267813	0.288896
808	A_51_P201904	Ndufb5	NM_025316	5.1688	4.89341	4.42263	6.47945	5.46229	6.18642	5.64031	5.58527	5.30948	5.65453	5.19301	7.10075
809	A_55_P2022128	Cntnap1	NM_016782	5.09893	4.94551	4.3256	5.66475	5.20305	5.82154	5.31556	6.17426	4.83642	5.90238	5.48081	6.18941
810	ERCC-00024_60	ERCC-00024_60	ERCC-00024_60	0.0074921	0.00702493	0.00719363	0.00685922	0.00979506	0.00993587	0.00943762	0.00827699	0.00778143	0.00724239	0.00862519	0.0104873
811	ERCC-00104_60	ERCC-00104_60	ERCC-00104_60	0.00748184	0.00699844	0.00716816	0.00683947	0.00976753	0.0590254	0.0252783	0.00825466	0.00774786	0.00720306	0.00858368	0.010466
812	A_55_P2098578	Tubd1	NM_001199045	0.360706	0.35207	0.47332	0.378203	0.512072	0.272953	0.410767	0.522959	0.52584	0.356023	0.40414	0.596753
813	A_30_P01017914	chr3:37543523-37613073_F	chr3:37543523-37613073_F	0.191055	0.147211	0.207679	0.111779	0.208136	0.199963	0.148862	0.191315	0.170711	0.119378	0.169142	0.20775
814	A_55_P2011341	A_55_P2011341	A_55_P2011341	0.117109	0.317093	0.177648	0.105784	0.135493	0.101934	0.0765193	0.111166	0.0715193	0.466234	0.139755	0.166434
815	A_65_P17476	Gse1	NM_198671	0.0956273	0.0915621	0.0667493	0.101642	0.102398	0.109804	0.0904218	0.0573563	0.0809441	0.10997	0.0951833	0.0841984
816	A_30_P01022879	chr14:106068373-106146613_F	chr14:106068373-106146613_F	0.00739133	0.00682293	0.00699376	0.00669933	0.00957767	0.00970197	0.026243	0.00809425	0.00752885	0.00695709	0.00831135	0.0103105
817	A_30_P01026702	chr1:161046625-161069450_R	chr1:161046625-161069450_R	0.00736582	0.00677428	0.00694924	0.00666387	0.0117781	0.00965491	0.00922983	0.00805195	0.00747409	0.0138671	0.00824811	0.0173045
818	A_55_P2091294	Hps5	NM_001005247	0.0333299	0.037487	0.0915353	0.0403416	0.0326212	0.0336241	0.0278215	0.0518602	0.0370623	0.035352	0.036323	0.0340746
819	A_30_P01018417	chr18:78190463-78235438_R	chr18:78190463-78235438_R	0.00730794	0.0092117	0.00684849	0.0116927	0.0094132	0.00953094	0.00913419	0.00795679	0.00736081	0.00677323	0.00809555	0.0101755
820	DarkCorner	DarkCorner	DarkCorner	0.00727016	0.00662636	0.00679293	0.00653442	0.0093498	0.00946378	0.00908149	0.00790459	0.0072903	0.00670256	0.0080194	0.0101213
821	A_55_P1959338	AI846148	NM_001033139	1.59852	1.69664	1.53152	1.60715	1.74189	1.67002	1.69518	1.75284	1.75644	1.68595	1.9922	1.76467
822	A_51_P147274	Clec4a3	NM_153197	0.106955	0.1488	0.118024	0.0928549	0.0856138	0.106657	0.063626	0.0341612	0.0870103	0.0853524	0.0865555	0.147843
823	A_51_P367070	Il9	NM_008373	0.00775369	0.0072501	0.00709546	0.00665071	0.0100249	0.0107243	0.00925212	0.00832107	0.00832938	0.00764368	0.0089902	0.0106668
824	A_30_P01022616	chr17:27445260-27455641_R	chr17:27445260-27455641_R	0.0278294	0.0265525	0.0172456	0.0114927	0.0254796	0.0107909	0.0116606	0.011586	0.0123433	0.0252954	0.0279529	0.010705
825	A_30_P01026045	chr4:3406175-3443875_R	chr4:3406175-3443875_R	0.0543525	0.0434709	0.0462533	0.052756	0.0877076	0.305013	0.0473571	0.0479352	0.0771557	0.0403278	0.0319491	0.0221109
826	A_55_P2086741	Fam3a	ENSMUST00000141604	0.150546	0.172766	0.159753	0.177494	0.180061	0.219857	0.212747	0.14868	0.205138	0.214634	0.222908	0.170104
827	A_55_P2094104	ENSMUST00000103380	ENSMUST00000103380	0.00800267	0.00751029	0.00735165	0.00692393	0.0103524	0.0109599	0.00952631	0.0085775	0.00859656	0.00788023	0.00920068	0.0108167
828	A_55_P2014249	Sema3a	NM_009152	0.00884988	0.0127616	0.0517019	0.00954751	0.0104207	0.0166585	0.0176842	0.0289538	0.0470831	0.0140399	0.00924183	0.010842
829	A_55_P2251082	Qk	AK033279	0.81659	0.806334	0.893775	0.639059	0.882652	0.741128	0.827863	0.663813	0.730174	0.833044	0.935822	0.663579
830	A_55_P2466575	4930402H24Rik	NM_029432	0.0921793	0.0576415	0.110494	0.0643031	0.128778	0.232916	0.0936349	0.0653944	0.0900298	0.0680636	0.086825	0.0967036
831	A_55_P1974317	Surf6	NM_009298	1.36609	1.26253	1.298	1.21637	1.2585	1.29519	1.20837	1.18413	1.27457	1.24111	1.25571	1.1781
832	A_55_P2091496	Dppa3	NM_139218	0.00822291	0.007745	0.0130936	0.00982243	0.0180869	0.0111396	0.0166763	0.00880073	0.00882423	0.00808099	0.00936107	0.0109211
833	A_30_P01030821	chr12:12876192-12918398_R	chr12:12876192-12918398_R	0.0115505	0.021201	0.0306791	0.0285549	0.0720508	0.0111618	0.0610684	0.0224413	0.0245319	0.00811493	0.0122446	0.0109266
834	A_55_P2126207	1600014K23Rik	NM_028046	0.06777	0.0808801	0.107519	0.0882474	0.10908	0.0997346	0.0733954	0.0678303	0.0749647	0.0533518	0.0574453	0.0496044
835	A_55_P1977558	Dip2b	NM_001159361	0.152804	0.148253	0.165493	0.16466	0.164329	0.118977	0.144035	0.162472	0.156202	0.145615	0.184483	0.152438
836	A_30_P01024337	chr1:196445304-196445818_R	chr1:196445304-196445818_R	0.0118349	0.0208194	0.0184888	0.0198739	0.0241695	0.0299377	0.0321288	0.0378798	0.0193059	0.0270268	0.00941978	0.0109468
837	A_55_P2370931	AU017674	CK334688	0.00834833	0.0078847	0.00771672	0.0073519	0.0108025	0.0112059	0.0803079	0.0325493	0.00894985	0.0082012	0.00942684	0.0109445
838	A_55_P2070254	Pqbp1	NM_019478	0.286159	0.253177	0.295848	0.262967	0.264774	0.296324	0.281271	0.296016	0.292619	0.2651	0.270317	0.27488
839	A_55_P2145800	LOC102633883	XR_377187	0.482362	0.50446	0.541429	0.418307	0.620367	0.453252	0.451481	0.510281	0.472053	0.430621	0.497619	0.504945
840	A_55_P1995487	Rfx7	NM_001033536	0.0928596	0.103071	0.13853	0.114841	0.130495	0.121674	0.0951077	0.117402	0.0989385	0.0867061	0.143257	0.165195
841	A_55_P2252891	AK160358	AK160358	0.419466	0.401808	0.434601	0.408832	0.391466	0.40544	0.336771	0.474531	0.421373	0.303294	0.326828	0.375773
842	ERCC-00081_60	ERCC-00081_60	ERCC-00081_60	0.00839153	0.00794284	0.00777237	0.00743969	0.140671	0.222634	0.156005	0.00896489	0.00898373	0.0082416	0.00940517	0.0109113
843	A_55_P2169129	A_55_P2169129	A_55_P2169129	0.137232	0.140948	0.135914	0.137503	0.249596	0.432943	0.233631	0.163418	0.110159	0.0984336	0.144485	0.118372
844	A_52_P639028	Myt1l	XM_006515003	0.115819	0.160381	0.134523	0.146618	0.249939	0.199044	0.165542	0.163749	0.188163	0.162703	0.163818	0.158739
845	A_55_P2046563	Cym	NM_001111143	0.00838317	0.00794431	0.0188488	0.00745861	0.0108467	0.0111222	0.00990465	0.00895362	0.0089676	0.0082324	0.00936075	0.0108631
846	ERCC-00013_180	ERCC-00013_180	ERCC-00013_180	0.0243611	0.0131976	0.0169043	0.00746007	0.204461	0.0110988	0.0194684	0.00894504	0.010865	0.00822562	0.00934149	0.010844
847	A_51_P120823	Olfr868	NM_146559	0.142462	0.148459	0.137163	0.127133	0.197077	0.134204	0.155881	0.15585	0.0982497	0.0581047	0.0611704	0.0742872
848	A_55_P2028788	Slc39a11	NM_001166503	7.15333	8.12638	6.46058	7.80785	7.75751	7.89963	7.39616	6.61113	8.25685	8.59662	7.06325	7.07769
849	A_51_P126067	Cd2	NM_013486	0.0299385	0.0132733	0.0340131	0.0254828	0.0176828	0.0408461	0.0195333	0.0382496	0.0279129	0.0248589	0.025579	0.0236704
850	A_30_P01031466	chr8:18895366-18925423_R	chr8:18895366-18925423_R	0.0505686	0.0133305	0.040205	0.0291211	0.0264102	0.0109836	0.0343124	0.0354543	0.0150326	0.012301	0.0202753	0.0312776
851	A_30_P01033003	chr6:142915873-142938323_F	chr6:142915873-142938323_F	0.409024	0.340066	0.436338	0.287631	0.478332	0.346175	0.323285	0.385274	0.379366	0.374953	0.378096	0.337991
852	A_30_P01021252	chr15:77164450-77201325_F	chr15:77164450-77201325_F	1.03958	0.846225	1.04532	0.929847	0.955291	0.863257	0.982803	1.0373	0.852637	0.766449	0.803978	0.812769
853	A_55_P2086659	Rad54l	NM_009015	0.0735891	0.0789418	0.105978	0.0747032	0.0966616	0.0614671	0.0599383	0.0767601	0.0772141	0.0719932	0.112988	0.0789962
854	A_52_P556462	Fancd2	NM_001033244	0.00824263	0.0230316	0.00868464	0.0244107	0.0954426	0.0230748	0.0355393	0.0194048	0.00879658	0.0294159	0.0133063	0.04879
855	A_30_P01025100	chr10:120336296-120354471_F	chr10:120336296-120354471_F	0.00821889	0.00781031	0.00763923	0.00738378	0.178808	0.0108003	0.134941	0.0087787	0.00876924	0.0153482	0.00909545	0.013884
856	A_66_P100853	Hist1h2ao	NM_001177544	9.20954	16.0981	11.7894	7.71335	6.07849	17.2317	9.89374	9.25017	10.8332	14.9105	21.7351	12.8061
857	A_55_P2009882	Ccbe1	NM_178793	0.0708168	0.0912719	0.0794001	0.0618993	0.0818885	0.287248	0.258528	0.111682	0.0456823	0.0307526	0.0536668	0.0322936
858	A_55_P1999760	Lrrc51	NM_001162974	1.73834	1.59817	1.89458	2.16181	1.86745	1.9415	1.78094	1.58176	1.89109	2.26773	1.98789	1.90861
859	A_51_P117115	Olfr53	NM_146960	0.0427639	0.0457812	0.0339951	0.0310781	0.180303	0.0404608	0.307432	0.0360967	0.0422796	0.0395982	0.0271757	0.0287179
860	A_30_P01025325	chr6:89207813-89209131_R	chr6:89207813-89209131_R	0.0287378	0.0413659	0.040781	0.0326472	0.0706959	0.124389	0.0568125	0.0284239	0.013531	0.020991	0.013787	0.0104614
861	A_30_P01033562	chr3:93564825-93576725_R	chr3:93564825-93576725_R	0.016391	0.0245309	0.0154768	0.0187903	0.0320308	0.0443303	0.0777869	0.0259754	0.0331262	0.00793435	0.0288992	0.0562954
862	A_30_P01023778	chr3:48896525-48994125_F	chr3:48896525-48994125_F	0.00802164	0.00763464	0.00746717	0.00724381	0.0199449	0.0105006	0.101032	0.00857698	0.0118387	0.00790696	0.00885038	0.0215844
863	A_55_P2167999	Ldlr	NM_010700	13.6814	15.5234	14.0593	15.0165	15.0584	14.4911	17.8111	16.6085	16.4716	16.0762	15.9754	13.8857
864	A_51_P109295	Pcdhb3	NM_053128	0.414675	0.488416	0.428533	0.450565	0.357967	0.419514	0.427656	0.39371	0.478616	0.380123	0.416019	0.409244
865	A_52_P309890	Mcc	NM_001085373	0.0468489	0.0358607	0.0484339	0.0378421	0.0428188	0.0742646	0.0474015	0.0513845	0.0362931	0.0357969	0.0430273	0.0231552
866	A_51_P113195	Upk1b	NM_178924	0.00831221	0.0179172	0.00799322	0.00714686	0.0102218	0.0103201	0.0164604	0.00844832	0.00840709	0.0103682	0.00870443	0.0222731
867	A_55_P2044982	Zfp74	NM_178384	0.669011	0.766834	0.945591	0.789254	0.81691	0.656708	1.03384	0.91912	0.650665	0.821313	0.619749	0.818335
868	A_30_P01026341	chr18:4420141-4420620_F	chr18:4420141-4420620_F	0.0172704	0.024799	0.0203125	0.00755186	0.0173568	0.0142323	0.102789	0.00838357	0.00951359	0.00773949	0.00863247	0.0102042
869	A_30_P01026954	chr3:121356775-121357347_R	chr3:121356775-121357347_R	0.00779526	0.00742998	0.00726979	0.00706972	0.0100979	0.0320794	0.0547803	0.0083499	0.00829993	0.0077098	0.00859681	0.0135189
870	A_30_P01023019	chr7:71220656-71221612_R	chr7:71220656-71221612_R	0.00780331	0.00740008	0.0192183	0.00793992	0.0100565	0.0101407	0.00917898	0.00831695	0.00826454	0.00768126	0.00856153	0.0133188
871	A_55_P2049095	Atat1	NM_001142744	0.190516	0.202683	0.237893	0.218207	0.223023	0.191994	0.227209	0.200609	0.237597	0.199504	0.197298	0.151055
872	ERCC-00003_63	ERCC-00003_63	ERCC-00003_63	0.00769371	0.0073391	0.00718503	0.00699073	0.00997336	0.0100524	0.0149737	0.00825246	0.00819357	0.00762537	0.00848995	0.0100824
873	A_30_P01032030	chr17:66802920-66834745_F	chr17:66802920-66834745_F	0.119201	0.100939	0.136164	0.111466	0.0996776	0.100349	0.198012	0.092503	0.0807801	0.0690025	0.0542616	0.0687114
874	A_30_P01020746	chr7:68849401-68958266_R	chr7:68849401-68958266_R	0.0514705	0.0627395	0.0806783	0.0842739	0.0748612	0.269954	0.107608	0.0475693	0.0859896	0.102828	0.0529445	0.0490951
875	A_51_P173564	Ahsa1	NM_146036	38.9189	35.588	32.3848	42.1115	40.5033	40.5959	38.3911	38.9359	39.1849	45.2443	41.0567	44.4786
876	A_30_P01027041	chr9:4260788-4261404_F	chr9:4260788-4261404_F	0.0169552	0.00722252	0.025661	0.0125446	0.240937	0.0138874	0.0108595	0.00812502	0.0423391	0.011099	0.00836113	0.0121116
877	A_55_P1965694	Gabrg2	NM_008073	2.6991	2.58599	2.23332	3.58175	3.73513	2.97415	3.57432	3.26376	3.00238	3.53994	3.8099	4.13299
878	A_55_P1991461	TC1732485	TC1732485	0.00750455	0.00716535	0.00739985	0.00683612	0.0175438	0.00980512	0.00889691	0.00806666	0.00798477	0.00746258	0.00830126	0.00991167
879	A_30_P01029024	chr11:120079199-120130099_F	chr11:120079199-120130099_F	0.011937	0.0145694	0.0281512	0.0227032	0.0249397	0.0134003	0.0233753	0.0218101	0.00795814	0.0269	0.011177	0.0143677
880	A_55_P2140487	TC1600058	TC1600058	0.00744072	0.00711003	0.00738867	0.00678676	0.0352048	0.0097292	0.00883656	0.00800558	0.00792562	0.00741451	0.00824308	0.00986037
881	A_66_P101664	Scai	NM_178778	0.195747	0.214189	0.185117	0.224075	0.326845	0.210241	0.172877	0.224703	0.224597	0.22339	0.197113	0.178469
882	A_55_P1979699	Spop	NM_025287	2.19264	2.53787	4.31567	2.86529	2.57209	2.82356	3.11437	3.61299	2.94578	2.52309	2.29353	2.28763
883	A_30_P01030746	chr1:53215418-53244461_R	chr1:53215418-53244461_R	0.0073537	0.00703177	0.00689425	0.0067154	0.0206314	0.0397761	0.0323251	0.00792249	0.00783447	0.00734152	0.00816249	0.0097899
884	ERCC-00171_229	ERCC-00171_229	ERCC-00171_229	0.00732489	0.0070067	0.00687009	0.00669435	0.0151477	0.0200051	0.0087176	0.00789631	0.00780643	0.00732044	0.00813886	0.00976797
885	A_30_P01018338	chr14:106562325-106660675_F	chr14:106562325-106660675_F	0.064748	0.0716981	0.145467	0.0554009	0.134148	0.0772504	0.0661652	0.0608291	0.0536835	0.0478871	0.0538043	0.057626
886	A_55_P2103206	Dusp8	NM_008748	0.964979	0.963786	0.913102	0.950117	0.984364	0.99081	0.830889	0.978163	0.965177	1.01656	0.839001	0.931916
887	A_55_P2165334	Nde1	NM_001285503	4.21064	4.33633	5.45516	4.27043	3.93359	3.74779	3.95466	4.31125	4.17578	3.6916	4.83588	3.8783
888	A_51_P427530	Pgm1	NM_025700	0.154757	0.161468	0.154338	0.138616	0.140387	0.127429	0.157433	0.108444	0.165569	0.145636	0.143908	0.1203
889	A_66_P100262	Olfr1471	NM_207132	0.007193	0.00689228	0.00676648	0.00658829	0.00936175	0.112212	0.109427	0.00777783	0.00767906	0.00721816	0.00803063	0.00966988
890	A_30_P01029975	chr8:41730287-41746862_R	chr8:41730287-41746862_R	0.00717093	0.00687169	0.00674865	0.00657126	0.00933378	0.00940924	0.190789	0.00775673	0.00850911	0.00720092	0.0089786	0.0125836
891	A_55_P2071087	Cyb561d1	NM_001081320	1.22044	1.40356	1.08478	1.4219	1.39332	1.51194	1.36022	1.38443	1.42299	1.39313	1.40373	1.31032
892	A_30_P01022162	chr6:117829576-117834247_F	chr6:117829576-117834247_F	0.0183364	0.0242936	0.0179192	0.0129331	0.185254	0.126876	0.0136405	0.0288	0.0138913	0.0151562	0.0201025	0.018585
893	A_55_P1972448	LOC102633662	XM_006511592	0.289441	0.276619	0.286779	0.255851	0.495961	0.25612	0.476203	0.279495	0.317254	0.297157	0.314541	0.28491
894	A_30_P01031447	chr5:120253747-120281800_R	chr5:120253747-120281800_R	0.00708252	0.0246269	0.0277066	0.0226385	0.042036	0.0272524	0.0901622	0.0201957	0.00757081	0.00713869	0.00889195	0.00960028
895	A_55_P2148684	Best1	NM_011913	0.00706318	0.00678233	0.00667025	0.0064863	0.00925587	0.00929533	0.0201494	0.00766684	0.00755265	0.00712364	0.00793941	0.00958917
896	ERCC-00123_60	ERCC-00123_60	ERCC-00123_60	0.0070464	0.00933355	0.00665735	0.006472	0.0189019	0.0112833	0.0622643	0.00765075	0.00753455	0.00711244	0.00792821	0.00957893
897	A_55_P2094484	Gm14137	NM_001039223	0.0070287	0.00675083	0.00664536	0.00645934	0.0723325	0.00925738	0.0180868	0.00763663	0.00751954	0.00710065	0.00791804	0.00957009
898	ETG05_66023	ETG05_66023	ETG05_66023	0.0694149	0.0391489	0.0522047	0.0474817	0.202987	0.0673556	0.0491504	0.0677314	0.0388878	0.0343999	0.0446743	0.0255212
899	3xSLv1	3xSLv1	3xSLv1	0.00699609	0.00672431	0.00662396	0.00643417	0.00913649	0.00922489	0.0257406	0.00761163	0.00748994	0.00708055	0.00790199	0.00955517
900	A_30_P01030094	chr12:74135916-74142780_F	chr12:74135916-74142780_F	0.222301	0.205992	0.189441	0.209459	0.230937	0.199848	0.386542	0.200331	0.159391	0.170061	0.136894	0.198589
901	A_55_P2084458	Tma16	XM_006509715	0.0765869	0.0854336	0.0739959	0.0717946	0.0700243	0.0708213	0.0515142	0.0526858	0.0459839	0.0649154	0.0489876	0.0455678
902	A_30_P01031269	chr17:17492400-17507525_R	chr17:17492400-17507525_R	0.033632	0.0530515	0.0476196	0.0386678	0.0836303	0.045954	0.0568788	0.055878	0.0556451	0.0333037	0.0580539	0.0467456
903	A_30_P01031325	chr9:56910620-56919495_F	chr9:56910620-56919495_F	0.0386975	0.0204878	0.0427385	0.0380141	0.021363	0.0327439	0.0371406	0.0393051	0.0502358	0.0351899	0.0275898	0.0386224
904	A_51_P127681	Clic4	NM_013885	6.95525	7.41468	16.3159	9.58709	10.056	9.43595	6.97583	12.0335	11.0148	1.74343	10.5507	10.9349
905	A_30_P01027915	chr19:54011403-54018978_F	chr19:54011403-54018978_F	0.033577	0.0234455	0.0284885	0.0340345	0.0415345	0.0417567	0.113099	0.0171827	0.0546008	0.0394933	0.0359039	0.0754358
906	A_55_P2093535	Rps8	NM_009098	70.1503	71.7603	74.1361	66.5037	69.5911	70.2629	71.4496	67.207	72.3097	78.6924	72.5191	76.2251
907	A_30_P01030333	chr6:134838675-134847075_F	chr6:134838675-134847075_F	0.0233149	0.0134094	0.0474731	0.0309055	0.0195801	0.0586955	0.026587	0.0199889	0.0142914	0.0097102	0.0134778	0.0187584
908	A_55_P2155362	TC1677074	TC1677074	0.00689781	0.00665136	0.00657732	0.00636746	0.00904196	0.157327	0.00836362	0.00755184	0.00741196	0.00773812	0.0078901	0.00954206
909	A_55_P2202558	TC1642866	TC1642866	0.00689098	0.00664742	0.00657702	0.00636443	0.00903661	0.043324	0.00836333	0.00755044	0.00740765	0.00703313	0.00789483	0.00954591
910	A_55_P2154914	Acap1	NM_153788	0.112236	0.137479	0.137918	0.104753	0.171742	0.275154	0.144225	0.122651	0.119507	0.128661	0.193379	0.116858
911	A_30_P01031964	chr9:58301467-58323783_R	chr9:58301467-58323783_R	0.0102859	0.0139609	0.0217502	0.0203811	0.0781269	0.0818634	0.0306279	0.0250773	0.00931702	0.00907212	0.00790776	0.0095568
912	A_30_P01022854	chr9:100977450-100989325_F	chr9:100977450-100989325_F	0.0117131	0.0192034	0.0244765	0.0164182	0.186288	0.0293228	0.0965635	0.0236804	0.0208265	0.014624	0.02582	0.0463609
913	A_30_P01026710	chr8:74431707-74442440_F	chr8:74431707-74442440_F	0.201499	0.170703	0.248067	0.218626	0.172235	0.197949	0.342145	0.171018	0.191275	0.180512	0.18723	0.147387
914	A_30_P01025376	chr2:71576218-71603818_R	chr2:71576218-71603818_R	0.0563814	0.0282761	0.0454024	0.047806	0.0450521	0.0542276	0.0538228	0.0397146	0.0431071	0.0397182	0.0534369	0.0671931
915	A_55_P2041626	Ceacam12	NM_026087	0.00687507	0.00727114	0.0065953	0.0063646	0.0090397	0.155006	0.00839114	0.00756489	0.00741176	0.00704915	0.00794667	0.00959142
916	A_55_P2139431	Ces2h	NM_001272045	0.00687628	0.00664867	0.00660171	0.00636766	0.00904556	0.195535	0.00885464	0.00757085	0.0074156	0.0102277	0.00795942	0.00960247
917	A_30_P01017900	chr4:129488462-129516410_F	chr4:129488462-129516410_F	0.00687803	0.00665232	0.006609	0.00637149	0.0729564	0.0430523	0.00884726	0.00757779	0.00742033	0.00706148	0.00797273	0.00961467
918	A_55_P2008443	Mybpc1	NM_175418	0.00688055	0.0154571	0.0122386	0.00637617	0.106543	0.012545	0.0486243	0.0153608	0.00742636	0.00706827	0.00798716	0.00962789
919	A_55_P2000668	Stxbp2	NM_011503	2.98261	2.67988	2.67876	2.33733	2.5795	2.74502	2.49828	2.72574	2.76411	2.39923	2.65719	2.70455
920	A_52_P640922	Dcdc2a	NM_177577	0.0699713	0.055143	0.150729	0.0520746	0.115903	0.202146	0.0895773	0.0741717	0.0525627	0.0696955	0.0678156	0.0611663
921	A_30_P01031126	chr1:15837503-15838648_F	chr1:15837503-15838648_F	0.0068932	0.0139085	0.0165297	0.0138947	0.010028	0.110612	0.0259718	0.0221854	0.00864676	0.0138969	0.0260549	0.0178174
922	A_55_P1967933	TC1699856	TC1699856	0.00689942	0.00668285	0.0189354	0.0108848	0.0119851	0.0197945	0.0435322	0.0126819	0.00745751	0.00710328	0.00805516	0.00968835
923	A_51_P513032	Trps1	NM_032000	0.330803	0.366583	0.533016	0.380202	0.409966	0.277688	0.326474	0.395044	0.369765	0.375842	0.364265	0.339536
924	A_51_P480136	Cryba2	NM_021541	0.980403	0.890773	1.03988	0.627864	0.640121	0.711758	0.653964	0.787762	0.680933	0.757793	0.544309	0.461833
925	A_66_P125873	Nup93	NM_172410	6.67108	6.97992	5.58062	7.63966	6.85263	7.12491	7.53875	7.49357	7.7516	7.76268	7.19495	8.87648
926	A_51_P103757	Kat8	NM_026370	6.53429	6.42793	5.90697	7.50956	6.76082	6.71615	6.4936	6.19911	7.1233	7.03731	7.31135	7.58852
927	A_55_P2166733	NAP059265-1	NAP059265-1	0.00694202	0.00673189	0.00672688	0.00645272	0.00917297	0.00931524	0.0109276	0.00769875	0.00751629	0.00716135	0.00915215	0.00978352
928	A_52_P635015	Gpr39	NM_027677	0.00993203	0.00674364	0.00674236	0.00646458	0.0151857	0.00933472	0.00859021	0.00771531	0.00770452	0.0071751	0.00818327	0.00980466
929	A_55_P2116094	Gsc2	NM_029469	0.0256887	0.0181564	0.0154431	0.00769585	0.00920946	0.050771	0.0186591	0.0220203	0.0248164	0.00718872	0.00989904	0.00982622
930	A_30_P01025629	chr16:25517037-25531362_R	chr16:25517037-25531362_R	0.00697719	0.00676882	0.00677608	0.00649015	0.00922887	0.0183809	0.00863522	0.00775051	0.00755991	0.00720284	0.00823101	0.00984941
931	A_55_P2118412	A_55_P2118412	A_55_P2118412	0.00699024	0.00678246	0.00679382	0.00650409	0.00924882	0.00939752	0.00891351	0.00776936	0.00790751	0.00721721	0.00825613	0.00987215
932	A_30_P01024985	chr6:67155508-67216941_R	chr6:67155508-67216941_R	0.0070036	0.00679618	0.00681182	0.00651836	0.00926958	0.00971037	0.0245595	0.00778855	0.0075908	0.00723253	0.00828111	0.00989556
933	A_30_P01029960	chr4:145539725-145596000_F	chr4:145539725-145596000_F	0.007018	0.0068104	0.00683034	0.00653375	0.00929102	0.0110398	0.00870863	0.00780753	0.0267548	0.00724735	0.00830672	0.00991999
934	A_30_P01024084	chr15:97674015-97674423_R	chr15:97674015-97674423_R	0.0343304	0.0276417	0.0520782	0.0400988	0.0943001	0.030007	0.0338139	0.0300192	0.0239984	0.0352539	0.0271696	0.0319244
935	A_55_P2164890	5830415F09Rik	NM_029086	0.0183085	0.014456	0.0435611	0.0330282	0.0439882	0.025117	0.0190535	0.0272117	0.0289694	0.0323719	0.0307463	0.0308294
936	ERCC-00031_101	ERCC-00031_101	ERCC-00031_101	0.00706358	0.0068555	0.00688853	0.00657912	0.00935917	0.00951553	0.00878801	0.00787019	0.00765964	0.00729367	0.00838537	0.00999423
937	A_51_P120093	Snx10	NM_028035	9.52442	9.91464	8.41605	9.44579	9.88492	9.73651	9.78573	9.62553	10.1017	10.1518	8.64259	9.45495
938	A_55_P2064333	Lama3	NM_010680	0.177379	0.169737	0.169135	0.170606	0.1922	0.280879	0.220133	0.174144	0.197816	0.179003	0.144384	0.176607
939	A_55_P2199457	Plxna4os1	NR_040277	0.00711176	0.00690457	0.00694993	0.00662842	0.00943223	0.00959123	0.0316387	0.00793682	0.00771559	0.010662	0.0084664	0.010073
940	A_52_P100926	Il1a	NM_010554	0.00713097	0.00691919	0.00697013	0.00664562	0.00945619	0.00961705	0.00890233	0.00795843	0.00773174	0.00735562	0.00849225	0.0100972
941	A_55_P2028511	Gm15466	XM_003085343	2.85972	2.90195	3.39576	2.88938	2.73962	2.89104	3.05796	3.31197	3.32548	3.01441	2.9848	3.24678
942	A_51_P106799	Pparg	NM_011146	0.599944	0.557537	0.607856	0.574947	0.584293	0.585574	0.622491	0.575436	0.594535	0.5651	0.571882	0.5584
943	A_51_P183213	Riiad1	NM_025506	0.0206744	0.0299378	0.110889	0.052576	0.14922	0.0573255	0.0298404	0.0224048	0.040454	0.0529581	0.0388615	0.0164241
944	A_51_P106799	Pparg	NM_011146	0.5089	0.568339	0.559785	0.533187	0.600441	0.558919	0.585437	0.562988	0.537915	0.580392	0.515935	0.512785
945	A_30_P01031682	chr18:82858314-82872414_F	chr18:82858314-82872414_F	0.639605	0.544256	0.553874	0.513451	0.577534	0.670923	0.772318	0.597381	0.450902	0.324576	0.398535	0.437568
946	A_51_P142989	Zfp429	NM_001080941	0.490831	0.536313	0.494188	0.476843	0.383805	0.370818	0.501832	0.410657	0.492183	0.40127	0.482356	0.339838
947	A_55_P2015403	9930111J21Rik1	NM_001114679	3.10229	3.01859	2.80826	2.66235	3.17954	3.14141	3.25004	2.86002	2.92714	2.64665	2.90484	3.39794
948	A_51_P274073	Kcnma1	XM_006518591	6.15247	6.54254	5.43139	6.48018	5.68245	6.77076	6.40202	6.39732	6.30574	6.56349	6.22498	6.77462
949	A_55_P2176631	A_55_P2176631	A_55_P2176631	0.00729731	0.00706031	0.0071513	0.00679746	0.00968077	0.00984638	0.00916276	0.00815928	0.00788584	0.00747761	0.00871762	0.0103272
950	A_30_P01024518	chr3:45163252-45179177_R	chr3:45163252-45179177_R	0.0619432	0.0479671	0.0697262	0.0537176	0.0412873	0.0688442	0.0205598	0.0793435	0.0602661	0.0371286	0.0477224	0.0826343
951	ERCC-00128_189	ERCC-00128_189	ERCC-00128_189	0.00733414	0.00708742	0.00718749	0.0134246	0.00972675	0.0098924	0.00921826	0.00820027	0.00791484	0.00749893	0.00875798	0.0103733
952	A_55_P2149500	Kifc2	NM_010630	8.01744	8.83852	8.62104	11.2795	10.8111	10.5066	10.0212	9.91591	9.79667	11.047	11.8503	9.87482
953	A_55_P1968824	Rpgr	NM_001177951	0.156228	0.201715	0.214027	0.207348	0.203223	0.226433	0.223469	0.254058	0.181814	0.2174	0.215185	0.217961
954	A_30_P01029221	chr18:38302523-38302756_R	chr18:38302523-38302756_R	0.00738476	0.00712039	0.00723729	0.00687192	0.00978942	0.00995671	0.0226132	0.00825733	0.00795259	0.00751958	0.00881065	0.0104352
955	A_30_P01033166	chr13:28952570-28953234_R	chr13:28952570-28953234_R	0.0404436	0.0536043	0.0424483	0.0258951	0.0187638	0.0272089	0.159198	0.0501833	0.0410487	0.0101306	0.0276679	0.037131
956	A_30_P01033522	chr5:149760472-149827389_R	chr5:149760472-149827389_R	0.00741851	0.0198983	0.00726323	0.00689709	0.0339566	0.0099916	0.00934407	0.0082902	0.00796998	0.00774155	0.00883733	0.0104751
957	A_30_P01024625	chr9:96964067-96973567_F	chr9:96964067-96973567_F	0.00796292	0.0071512	0.00727528	0.0177412	0.0195352	0.0108931	0.182236	0.00830516	0.00797904	0.00753116	0.00884805	0.0104922
958	A_30_P01031538	chr13:72906878-72923790_F	chr13:72906878-72923790_F	0.00744929	0.00715943	0.00728619	0.00691795	0.00985933	0.0100253	0.0934378	0.00831889	0.00798476	0.00753142	0.00885685	0.0105077
959	A_55_P2137045	A_55_P2137045	A_55_P2137045	0.0254031	0.0329177	0.0309012	0.0291714	0.0202896	0.0212301	0.0529699	0.0628442	0.0245482	0.0324482	0.0278257	0.0460643
960	A_30_P01026221	chr1:88396166-88396660_R	chr1:88396166-88396660_R	0.0110124	0.00716746	0.00730346	0.0174107	0.0098845	0.0155992	0.00942442	0.00972973	0.00799085	0.00752786	0.00886825	0.0120924
961	A_55_P2267240	4930471G03Rik	BU938417	0.0117136	0.00717248	0.00730973	0.00694058	0.0145594	0.0139725	0.00944052	0.00835181	0.0079919	0.00752348	0.00887048	0.0190135
962	A_52_P642207	Mkrn1	NM_018810	1.54903	1.70818	1.51822	1.52425	1.38432	1.49153	1.56912	1.2807	1.58264	1.77655	1.68286	1.60498
963	A_55_P2002702	Ddx18	NM_025860	1.70742	1.63614	1.51914	1.82576	1.81367	1.77499	1.66304	1.53763	1.71902	1.77689	1.83292	1.85582
964	ERCC-00098_150	ERCC-00098_150	ERCC-00098_150	0.00751644	0.00716931	0.00731795	0.00695189	0.00991429	0.0100707	0.00947868	0.00837172	0.00798262	0.00749655	0.00886189	0.0105703
965	A_55_P2125049	Gm11127	NM_001199967	10.6439	14.3004	5.38262	4.48911	6.93572	6.18968	4.3063	4.67252	3.97886	8.65149	4.12177	9.69603
966	A_55_P2173927	Insr	NM_010568	0.287129	0.251541	0.297409	0.264494	0.311352	0.356722	0.287871	0.282882	0.347399	0.208648	0.312869	0.330055
967	A_30_P01017687	chr17:5795893-5835243_F	chr17:5795893-5835243_F	0.181605	0.17366	0.186056	0.193232	0.237998	0.22749	0.252691	0.214088	0.170303	0.156304	0.152075	0.179322
968	A_52_P674467	Lin7a	NM_001039354	1.45902	1.29321	1.04147	1.65518	1.54399	1.51492	1.33098	1.22998	1.40181	1.49232	1.31784	1.55484
969	A_30_P01028590	chr3:34003359-34537330_F	chr3:34003359-34537330_F	0.254699	0.210622	0.189471	0.156383	0.22591	0.240364	0.263713	0.24256	0.210987	0.198981	0.166318	0.271042
970	A_30_P01032501	chr5:149751979-149808240_F	chr5:149751979-149808240_F	0.0141948	0.0155717	0.0072768	0.0137593	0.0155559	0.010028	0.017738	0.0252139	0.00790055	0.00737962	0.008766	0.0120631
971	ERCC-00158_78	ERCC-00158_78	ERCC-00158_78	0.00753108	0.0070972	0.00726193	0.00691545	0.106758	0.0100159	0.00948619	0.00833771	0.00787774	0.00735086	0.00873778	0.0105473
972	A_55_P2070069	Itpkb	NM_001081175	0.487029	0.443858	0.497587	0.577956	0.564937	0.506919	0.573844	0.503936	0.527025	0.478155	0.486614	0.515315
973	A_55_P2175502	M1ap	NM_033079	0.0535679	0.0547907	0.0455117	0.066354	0.0433796	0.0547447	0.0465655	0.0486135	0.080337	0.0734888	0.0785586	0.0380956
974	A_30_P01033458	chr1:63163019-63164281_F	chr1:63163019-63164281_F	0.364522	0.310998	0.338869	0.297262	0.361631	0.60092	0.320209	0.400381	0.357309	0.289462	0.394189	0.388121
975	A_30_P01022984	chr9:96664617-96683617_F	chr9:96664617-96683617_F	0.0074997	0.00700093	0.00848182	0.0173718	0.0192927	0.141999	0.034531	0.0110886	0.00775688	0.00720613	0.00858922	0.010475
976	A_55_P1964307	Mlf2	AK171220	0.947869	0.798919	0.786557	0.976099	0.906954	0.979531	0.818222	1.04325	0.695672	1.04725	0.795162	0.834699
977	A_55_P2115330	Nrg4	AK080089	0.0819236	0.0805462	0.0656656	0.0860815	0.0853246	0.0887667	0.0885264	0.0753977	0.0839029	0.0513192	0.058289	0.0767695
978	A_30_P01026561	chr10:126818382-126856582_R	chr10:126818382-126856582_R	0.0162045	0.00690376	0.00707293	0.0137069	0.0311237	0.0125246	0.00934317	0.0173632	0.0266759	0.00706588	0.00843276	0.0103898
979	A_52_P356119	Hus1	NM_008316	0.625735	0.531232	0.526802	0.567586	0.533981	0.518302	0.535385	0.579109	0.483816	0.470127	0.507838	0.546417
980	A_51_P114005	Gstm7	NM_026672	0.0902678	0.0949445	0.148045	0.104916	0.0852918	0.0798897	0.191014	0.122036	0.11375	0.112653	0.0826106	0.0815995
981	A_30_P01025578	chr5:30550467-30559008_F	chr5:30550467-30559008_F	0.0384937	0.0354577	0.113585	0.0320622	0.0343526	0.0215995	0.0132121	0.0325029	0.00832737	0.00901847	0.00823898	0.0102698
982	3xSLv1	3xSLv1	3xSLv1	0.00734478	0.00672638	0.0139064	0.00662118	0.00946997	0.00958688	0.00917936	0.00800226	0.00741416	0.00683003	0.00816585	0.0102229
983	A_30_P01021633	chr2:168804720-168854970_F	chr2:168804720-168854970_F	0.852102	0.696891	1.15938	0.672578	0.770666	0.929972	1.03793	0.950341	1.12595	0.662829	0.877886	1.34581
984	DarkCorner	DarkCorner	DarkCorner	0.0072763	0.0066177	0.00678299	0.00652987	0.00934304	0.009459	0.00907147	0.00789719	0.00728283	0.00669094	0.00800511	0.0101174
985	A_30_P01020025	chr11:22510175-22522025_R	chr11:22510175-22522025_R	0.00758201	0.00707554	0.00980406	0.00647414	0.0309918	0.0762407	0.00907048	0.00814615	0.0168715	0.00749139	0.00884326	0.0105778
986	A_55_P2128326	Ubap2l	NM_001165985	0.889513	0.781448	0.782998	0.796484	0.897203	0.906397	0.794706	0.863062	0.841949	0.887878	0.890989	1.1243
987	A_55_P1995404	Cd59b	NM_181858	0.0879566	0.0745127	0.0987292	0.0840183	0.0669374	0.0670438	0.0794377	0.0821986	0.0915987	0.0849638	0.0760395	0.128654
988	A_52_P385594	Tal2	NM_009317	0.0164745	0.00730571	0.0172967	0.01846	0.0100993	0.011087	0.0261445	0.0105745	0.0297412	0.0436038	0.0411981	0.0107226
989	A_30_P01030544	chr1:133839368-133839762_F	chr1:133839368-133839762_F	0.191179	0.154601	0.136557	0.113744	0.106936	0.182679	0.126795	0.111966	0.151693	0.107231	0.144589	0.0791355
990	A_55_P2136813	Rab10os	AK171768	0.601275	0.71295	0.909066	0.674508	0.755748	0.672021	0.57933	0.716132	0.719458	0.759044	0.774282	0.621089
991	A_52_P84096	Pgd	NM_001081274	6.91601	6.90663	6.1318	6.27501	6.64631	6.87135	6.54673	7.05226	7.11278	7.16217	6.51689	7.00406
992	A_30_P01021643	chr11:116936834-116948799_R	chr11:116936834-116948799_R	0.0298988	0.0161613	0.0440868	0.0353491	0.0264034	0.0241793	0.045759	0.0748252	0.0103076	0.0163632	0.016864	0.0108631
993	A_30_P01020931	chr7:69024136-69131056_R	chr7:69024136-69131056_R	0.0080964	0.00760888	0.00745078	0.00703549	0.175737	0.0110509	0.00963649	0.0419757	0.00869924	0.00797921	0.00928132	0.0108881
994	A_51_P247393	ENSMUST00000140820	ENSMUST00000140820	0.0226276	0.0109388	0.0834802	0.0454239	0.219055	0.0324389	0.0376563	0.0305313	0.0315464	0.0242421	0.00931632	0.0109104
995	A_30_P01033015	chr1:108657255-108667405_F	chr1:108657255-108667405_F	0.00818359	0.0077039	0.00754244	0.00713768	0.149098	0.114252	0.00973312	0.00876371	0.00878946	0.00806033	0.00934485	0.0109245
996	A_52_P1036735	Gm5142	NM_001004158	0.00822145	0.00774268	0.00758193	0.00718831	0.0723917	0.0494606	0.00976929	0.00880175	0.00882795	0.00809529	0.00936802	0.0109412
997	A_51_P277431	Ccdc3	NM_028804	0.0758616	0.0663358	0.141614	0.0326289	0.111637	0.01117	0.136762	0.0438713	0.041651	0.0170719	0.00939458	0.0109538
998	A_66_P109978	Bnip2	AK014659	0.0125069	0.0102957	0.0199174	0.0117239	0.0626625	0.0116495	0.046141	0.0122719	0.0183428	0.017074	0.0255492	0.0125241
999	A_51_P227165	2310030G06Rik	NM_025865	0.69878	0.529743	0.802737	0.706029	0.773037	0.672862	0.912168	0.711346	0.71838	0.685036	0.725884	0.454338
1000	A_55_P2144115	1700125H20Rik	NM_028589	0.0646749	0.0668743	0.0656819	0.0716887	0.0827659	0.0453661	0.0582353	0.0404584	0.0517802	0.0922752	0.0605563	0.0545665
1001	A_51_P104430	Magee1	NM_053201	2.32581	2.26539	1.97463	2.42287	2.11994	2.61357	2.39494	2.15477	2.37873	2.66715	2.30159	2.51459
1002	A_30_P01020898	chr6:86776350-86799450_F	chr6:86776350-86799450_F	0.0270685	0.02047	0.0196875	0.0224159	0.0313881	0.0149812	0.0650462	0.0152311	0.0201245	0.00823229	0.00958774	0.0109727
1003	A_55_P2412349	Klkb1	XM_006509290	0.00838382	0.0079257	0.02072	0.0179462	0.22471	0.0353637	0.0326367	0.0290123	0.0282755	0.0155086	0.00944476	0.0192616
1004	A_51_P480398	AK030693	AK030693	0.00839361	0.00793825	0.00777184	0.00742402	0.172335	0.0112219	0.009938	0.00896979	0.00899475	0.00825212	0.00944201	0.0109604
1005	A_55_P2112135	A_55_P2112135	A_55_P2112135	0.00840035	0.00794788	0.0125591	0.00743949	0.0108732	0.0112138	0.00994267	0.00897541	0.00899973	0.00825772	0.00943593	0.0109522
1006	A_55_P2117711	Rnf185	NM_145355	5.79343	5.97878	5.92914	5.85148	5.92692	6.07859	5.82996	6.09532	5.87299	6.14055	6.0677	5.94315
1007	A_30_P01020194	chr16:40467818-40468474_F	chr16:40467818-40468474_F	0.0331903	0.0118188	0.0111515	0.0342516	0.219539	0.144821	0.211945	0.0242809	0.0258567	0.0222389	0.00941549	0.0284457
1008	A_52_P1042732	Akap5	NM_001101471	0.0774434	0.0503103	0.142618	0.149338	0.126629	0.126037	0.112174	0.0983263	0.0749588	0.136315	0.15496	0.103493
1009	A_55_P1979669	Zfp946	NM_198003	2.72666	3.21431	2.75601	3.75217	3.50269	3.35886	3.36022	2.94246	3.33755	3.57765	3.33872	3.25787
1010	A_30_P01030357	chr3:19179899-19216399_R	chr3:19179899-19216399_R	0.0787686	0.0824674	0.0938125	0.0701939	0.319423	0.0581381	0.0702046	0.0734085	0.103884	0.0510437	0.0720552	0.062857
1011	A_51_P119401	Tug1	NR_002322	0.652726	0.648264	0.577923	0.656432	0.823408	0.631064	0.59713	0.629594	0.630187	0.584964	0.654237	0.621985
1012	A_55_P2249136	9630025H16Rik	AK079329	0.020942	0.0155182	0.023374	0.0164508	0.053991	0.0260026	0.0280813	0.0263169	0.0304131	0.0259162	0.0251208	0.022202
1013	A_52_P194851	2410089E03Rik	NM_001162906	0.405776	0.380791	0.345844	0.323836	0.366544	0.34387	0.325518	0.324862	0.377559	0.307273	0.318129	0.326193
1014	A_66_P113946	Dbpht2	NM_198866	0.043889	0.0324407	0.0468156	0.0571275	0.014172	0.0367193	0.0425595	0.0574956	0.0536194	0.0433381	0.0653943	0.0526161
1015	A_66_P111735	NAP093408-001	NAP093408-001	0.28585	0.287203	0.322716	0.27044	0.39264	0.330977	0.2849	0.31263	0.301717	0.310234	0.357975	0.294706
1016	A_55_P2012349	Fermt2	NM_146054	5.81041	6.22011	5.63872	6.51052	6.02425	5.91554	5.89981	6.09609	6.07798	6.38461	6.93905	6.11607
1017	A_55_P1978755	Zfp606	NM_001039951	0.075026	0.050298	0.115488	0.110859	0.0563234	0.0650531	0.0747088	0.0579632	0.0869689	0.058234	0.0916877	0.0679108
1018	A_51_P120066	9330151L19Rik	NR_033222	1.25344	1.41231	1.41983	1.46172	1.49896	1.44887	1.29009	1.23684	1.24757	1.58905	1.53342	1.51572
1019	A_51_P124568	Mpp1	NM_008621	6.98229	7.20811	6.13956	7.31833	7.09813	6.74942	7.22795	6.22161	7.71321	7.70049	7.10243	7.28918
1020	A_55_P2009895	Gm5113	NM_001033540	0.563238	0.574561	0.535795	0.601852	0.582439	0.602175	0.600783	0.542621	0.440819	0.484504	0.516426	0.481916
1021	A_51_P288916	Tmtc2	NM_177368	2.8949	3.00076	2.92345	2.94724	2.66632	3.04626	3.52322	3.11149	2.8639	3.1198	3.00642	2.95671
1022	A_30_P01029133	chr10:8606683-8665783_F	chr10:8606683-8665783_F	0.114253	0.119679	0.140683	0.118172	0.126157	0.242956	0.132383	0.159346	0.0896811	0.0807521	0.10199	0.119556
1023	A_52_P1013543	Gm13522	AI390992	0.00813623	0.0117441	0.0176458	0.0073326	0.0105309	0.0106654	0.106526	0.00869121	0.00867577	0.00801491	0.00898772	0.0105241
1024	A_55_P2085133	Ccdc40	NM_175430	0.027922	0.0194838	0.0604663	0.0320835	0.264278	0.228183	0.291169	0.0338844	0.0329702	0.0217688	0.053162	0.0316409
1025	A_30_P01024899	chr1:161973754-162006639_R	chr1:161973754-162006639_R	0.0134178	0.0167368	0.0152578	0.0142246	0.0686699	0.0899392	0.00953278	0.00862834	0.0285061	0.00796198	0.02579	0.0104585
1026	A_55_P2067142	Fau	BC062873	137.067	155.097	144.386	131.365	133.386	139.136	140.307	130.55	157.708	163.325	153.31	161.41
1027	A_55_P2052848	Mif	NM_010798	74.175	79.4103	63.8294	74.8529	75.3633	76.0741	71.7398	71.7407	78.8837	86.8769	74.7598	77.6732
1028	A_55_P2121349	BC110427	BC110427	4.91729	3.78133	4.03156	4.87845	3.79147	5.18237	3.43599	4.4061	3.26783	3.86533	3.88849	5.36821
1029	A_55_P2172364	A_55_P2172364	A_55_P2172364	0.0248727	0.0319987	0.0287417	0.0332014	0.0245562	0.0725603	0.0170819	0.0335566	0.0127349	0.00938375	0.0182171	0.0282873
1030	A_51_P361788	Vapa	NM_013933	38.2651	39.0229	36.0952	40.0673	38.9856	38.6998	40.246	38.0849	42.256	42.8122	41.586	41.8467
1031	A_55_P2025006	Klk1b26	NM_010644	0.0235329	0.00751143	0.0370481	0.0273415	0.213464	0.0103063	0.027755	0.0226518	0.0184476	0.0160398	0.0195642	0.0102631
1032	A_52_P21550	Gcnt1	NM_173442	0.268082	0.246088	0.392372	0.200335	0.232092	0.184345	0.366529	0.22001	0.175991	0.155806	0.230631	0.165773
1033	A_55_P2341025	Igkv4-53	BF139390	0.0505258	0.0420546	0.0540619	0.082545	0.0743371	0.0872936	0.115928	0.0807753	0.0469335	0.057696	0.0336548	0.0498692
1034	A_55_P2163622	Rps27	NM_027015	57.1927	69.059	65.455	56.7431	58.5902	60.7979	62.429	52.1589	65.6399	69.8706	62.0633	68.6025
1035	A_55_P2084547	9130019O22Rik	NM_030226	0.140553	0.124995	0.135332	0.137594	0.126723	0.123036	0.117961	0.133885	0.0809603	0.0651566	0.0889019	0.105854
1036	A_51_P290937	Cylc1	NM_026134	0.00772141	0.00736116	0.00720658	0.00701404	0.010006	0.010083	0.00913439	0.00827317	0.00822201	0.00765281	0.00851848	0.0101083
1037	A_51_P410516	ENSMUST00000021520	ENSMUST00000021520	0.0670415	0.0638748	0.0602662	0.0711907	0.0668239	0.0527466	0.155342	0.076504	0.0322295	0.0411291	0.0218476	0.0238184
1038	A_30_P01020549	chr13:62580825-62596425_R	chr13:62580825-62596425_R	0.189646	0.167045	0.195718	0.208607	0.208665	0.312774	0.350126	0.16567	0.216553	0.253492	0.17935	0.199644
1039	ERCC-00086_228	ERCC-00086_228	ERCC-00086_228	0.00762307	0.00727189	0.012945	0.00693459	0.0098834	0.125031	0.0090273	0.0104133	0.00811656	0.00756701	0.0150228	0.0178646
1040	A_55_P2026460	Fabp12	NM_029310	0.0297669	0.0072428	0.0221456	0.0141201	0.0298011	0.0610683	0.0365534	0.0376325	0.00982903	0.0110481	0.0101746	0.0237072
1041	A_51_P476481	Cyp2j13	NM_145548	1.31531	1.31083	1.20279	1.12243	1.32301	1.1494	1.28016	1.15456	1.22476	1.2021	1.11869	1.12451
1042	A_55_P2174524	A_55_P2174524	A_55_P2174524	0.0197027	0.0194046	0.0251845	0.0240886	0.183018	0.0234008	0.0520401	0.00808361	0.0148622	0.0133698	0.00846862	0.0171498
1043	A_51_P305811	1700021A07Rik	AK006189	0.00749528	0.00715696	0.00701322	0.00821866	0.0132181	0.00979422	0.00889033	0.00805446	0.00798649	0.0074587	0.00829581	0.0186995
1044	A_55_P2052719	Nadk2	NM_001085410	0.579276	0.5363	0.984832	0.6063	0.635811	0.623379	0.626344	0.545205	0.632944	0.567794	0.637924	0.629909
1045	A_30_P01022886	chr7:26227170-26234328_R	chr7:26227170-26234328_R	0.679905	0.625145	0.562848	0.62756	0.769671	0.675731	0.686233	0.617989	0.694534	0.65917	0.595008	0.609792
1046	A_51_P406077	1110001J03Rik	NM_025363	12.7188	12.8159	13.367	14.3535	13.1957	12.0799	12.6337	11.937	13.8675	13.0643	13.0923	13.0225
1047	A_55_P1953138	BU922195	BU922195	0.0777091	0.103583	0.104051	0.104749	0.111024	0.112609	0.198681	0.0927545	0.0555467	0.0620062	0.05954	0.0328487
1048	A_51_P484500	Pmfbp1	NM_019938	0.174818	0.209687	0.131983	0.194377	0.197164	0.207136	0.152205	0.156889	0.133797	0.21565	0.21358	0.144881
1049	A_55_P2016888	ENSMUST00000105884	ENSMUST00000105884	0.00732027	0.00699921	0.00686688	0.00668898	0.0589795	0.00957751	0.00871035	0.00788738	0.00779974	0.0162196	0.00813249	0.0097638
1050	A_51_P485421	ENSMUST00000103426	ENSMUST00000103426	0.312856	0.259151	0.367966	0.236603	0.518259	0.532636	0.37684	0.272364	0.650316	0.450246	0.661966	0.310533
1051	A_55_P2058933	Kif1b	NM_001290995	95.9529	97.978	86.2379	98.0126	99.0823	102.464	96.3354	98.0849	101.038	102.199	98.5212	100.104
1052	A_52_P214630	Sox9	NM_011448	0.207765	0.202677	0.444262	0.107181	0.107931	0.176818	0.159732	0.174897	0.175022	0.0901892	0.157106	0.133403
1053	ERCC-00158_78	ERCC-00158_78	ERCC-00158_78	0.00721549	0.00690743	0.00678346	0.00660519	0.00938524	0.00945539	0.0955914	0.00779228	0.00769818	0.00723739	0.00804746	0.00968772
1054	A_55_P1996802	LOC102634429	XM_006521612	0.146765	0.107672	0.142268	0.137712	0.147243	0.114227	0.244571	0.144074	0.115021	0.0848622	0.116965	0.143889
1055	A_51_P466673	Srsf7	NM_146083	1.24138	1.21877	1.30379	1.26207	1.36414	1.28906	1.3365	1.46459	1.3616	1.2971	1.42834	1.41502
1056	A_55_P2101585	Cd55	NM_010016	28.0984	32.1034	17.4928	32.6787	36.7039	32.4759	33.36	29.6752	39.4739	40.0979	29.2557	33.4553
1057	ERCC-00097_63	ERCC-00097_63	ERCC-00097_63	0.00712327	0.00682911	0.00671324	0.0065322	0.243781	0.00935306	0.129921	0.00771165	0.00760929	0.00716927	0.00797973	0.0241207
1058	A_52_P221776	Kif12	NM_010616	0.0152162	0.0271228	0.0328484	0.0172677	0.112137	0.0183689	0.0904882	0.0188233	0.0356123	0.0134215	0.0149672	0.0417775
1059	A_55_P1989419	AI987944	NM_183167	0.569046	0.510457	0.562292	0.577871	0.586273	0.49587	0.497757	0.479768	0.56956	0.40722	0.474285	0.492388
1060	A_30_P01030230	chr13:51248372-51259297_F	chr13:51248372-51259297_F	0.0605288	0.0519359	0.0638175	0.062538	0.0586526	0.0717357	0.106976	0.0459139	0.0407396	0.0361092	0.0551418	0.0333632
1061	A_30_P01019562	chr10:116814196-116920696_F	chr10:116814196-116920696_F	0.00704556	0.00676239	0.00665764	0.00647165	0.020815	0.00927068	0.07321	0.00764707	0.00753655	0.00711531	0.00793007	0.00958021
1062	A_52_P515769	Pcdh12	NM_017378	0.245846	0.326256	0.126788	0.236787	0.415029	0.163514	0.245812	0.3168	0.391385	0.318	0.195682	0.344165
1063	A_30_P01032611	chr14:28231577-28242027_F	chr14:28231577-28242027_F	0.0287751	0.0225549	0.0131844	0.0416678	0.0226394	0.0147355	0.056571	0.0246791	0.00750649	0.00709435	0.0134015	0.0294584
1064	A_55_P2351300	A330094K24Rik	AK020726	0.060386	0.0480235	0.0463683	0.0940762	0.0971374	0.0723502	0.150284	0.0664564	0.036583	0.054593	0.0660006	0.09375
1065	A_51_P257712	Olfr104-ps	BC167224	0.0069829	0.0095891	0.00661641	0.0064244	0.0311542	0.00920882	0.183236	0.00759943	0.0114889	0.00707666	0.0232314	0.00955257
1066	A_30_P01021194	chr13:94725285-94725556_F	chr13:94725285-94725556_F	0.00696851	0.00670081	0.00660973	0.00641485	0.00910911	0.00919762	0.00839672	0.00758994	0.00746937	0.00706977	0.00789665	0.00954863
1067	A_55_P2141841	CO807821	CO807821	0.104161	0.106007	0.0916826	0.10525	0.0921286	0.29042	0.0958121	0.121675	0.0632892	0.0958433	0.0859414	0.0749834
1068	A_52_P590661	Eef2k	NM_007908	0.174631	0.158579	0.14203	0.139253	0.108677	0.162249	0.226134	0.107104	0.135987	0.148381	0.102421	0.0998117
1069	A_55_P2132268	A930004D18Rik	NR_028376	0.00693546	0.0102581	0.0215084	0.020521	0.0184935	0.0449186	0.0707048	0.0174412	0.0281831	0.0118538	0.035865	0.0095423
1070	A_55_P2020656	Orai3	NM_198424	0.149341	0.181296	0.116815	0.200947	0.185505	0.139681	0.236839	0.185074	0.186133	0.203377	0.195499	0.147666
1071	A_55_P2090787	Mtus1	ENSMUST00000142936	0.110467	0.095269	0.128318	0.108081	0.115764	0.193026	0.127045	0.106913	0.109541	0.0818937	0.136704	0.0979937
1072	A_30_P01027977	chr2:33496712-33501183_F	chr2:33496712-33501183_F	0.0232386	0.0365345	0.0268942	0.0229287	0.0152174	0.022806	0.0142369	0.0205751	0.00742461	0.00704488	0.0129299	0.0374225
1073	A_55_P1993001	ENSMUST00000103526	ENSMUST00000103526	0.006902	0.00665401	0.0065838	0.0063722	0.00904925	0.110247	0.00836833	0.00755512	0.00742206	0.00783808	0.0278256	0.00954989
1074	A_30_P01031108	chr9:65651848-65652920_R	chr9:65651848-65652920_R	0.170605	0.132837	0.15197	0.140201	0.130338	0.133922	0.118222	0.209908	0.170703	0.143901	0.183562	0.175756
1075	A_55_P2004811	A_55_P2004811	A_55_P2004811	21.5476	23.099	23.5912	22.1585	22.9794	22.8391	24.0653	20.888	24.6556	26.8234	22.7032	26.0781
1076	A_55_P2170413	Dock3	NM_153413	0.051715	0.0264727	0.0498258	0.0340812	0.271773	0.080374	0.0584714	0.0338684	0.0508479	0.0515263	0.0598782	0.0260513
1077	A_55_P2131951	LOC102634888	XR_380527	0.0794634	0.0587695	0.0997184	0.0717583	0.30762	0.0762032	0.182712	0.0824639	0.0647889	0.0772571	0.111331	0.134913
1078	A_30_P01025312	chr3:36280098-36347798_R	chr3:36280098-36347798_R	0.0789498	0.0912901	0.064229	0.0887859	0.108094	0.0916058	0.126283	0.0950159	0.0766374	0.0676947	0.0467783	0.0822098
1079	A_51_P206445	Zfp773	NM_029584	0.148551	0.0982287	0.156163	0.128221	0.0828226	0.221723	0.0892467	0.174199	0.0699801	0.153491	0.0912989	0.111899
1080	ERCC-00009_60	ERCC-00009_60	ERCC-00009_60	0.00688575	0.0066527	0.00886046	0.0147988	0.0152008	0.15362	0.00840095	0.0168666	0.0111833	0.00706168	0.00796197	0.0209513
1081	A_30_P01027233	chr11:82593102-82594396_R	chr11:82593102-82594396_R	0.0950834	0.162526	0.181035	0.160707	0.146069	0.210265	0.160255	0.168781	0.136982	0.0901086	0.118363	0.149474
1082	A_30_P01017635	chr9:56914085-56914489_F	chr9:56914085-56914489_F	0.00688934	0.0066601	0.00742415	0.00638085	0.0659511	0.00918586	0.0244748	0.00796323	0.00743495	0.0070746	0.00798923	0.00962694
1083	A_55_P2050192	ND5	ENSMUST00000082418	25.2052	25.5027	24.0333	25.9208	25.566	26.4204	28.3263	27.9624	27.3636	32.7027	31.9352	40.8392
1084	A_30_P01019737	chr12:21380896-21387071_F	chr12:21380896-21387071_F	0.00902016	0.00667092	0.0105905	0.00639184	0.00908263	0.00920692	0.0207453	0.00760463	0.012578	0.00709052	0.00802077	0.00965512
1085	ERCC-00028_121	ERCC-00028_121	ERCC-00028_121	0.0344504	0.0176805	0.0196371	0.0164227	0.0263476	0.0676566	0.0182576	0.0246964	0.0153831	0.00709932	0.00819733	0.0126729
1086	A_51_P126626	Zfp503	NM_145459	1.15686	1.14642	0.954893	1.15271	1.16713	1.44365	1.07416	1.11499	1.2132	1.33914	1.15978	1.23605
1087	ERCC-00163_81	ERCC-00163_81	ERCC-00163_81	0.00691363	0.00669335	0.00667196	0.00641466	0.0253579	0.00924662	0.00848992	0.00763896	0.00832705	0.0071193	0.00807508	0.0097037
1088	A_51_P249286	Rgs16	NM_011267	0.533423	0.415643	0.680591	0.375524	0.388927	0.289128	0.433798	0.488946	0.694833	0.270834	0.270654	0.200205
1089	A_55_P2117222	Lhfpl5	XM_006524433	0.221316	0.212922	0.210097	0.217018	0.413036	0.245685	0.211894	0.245951	0.152392	0.191892	0.141007	0.168809
1090	A_55_P2181109	Il10rb	NM_008349	2.22878	2.35815	2.08811	2.37256	2.27178	1.92122	2.29646	2.06745	2.30929	1.96059	1.69206	1.9439
1091	A_55_P2000603	Slc50a1	NM_009057	6.56958	7.16898	7.01568	7.26378	7.3519	7.19212	7.03992	7.65467	7.3163	8.09998	7.99026	7.81135
1092	A_55_P2049061	A_55_P2049061	A_55_P2049061	9.10172	9.10142	7.57805	8.92036	8.49994	9.65789	8.58694	7.97216	8.45559	10.4254	9.25625	9.63241
1093	A_30_P01033614	chr9:24292762-24307562_F	chr9:24292762-24307562_F	0.112965	0.079331	0.0607642	0.0658661	0.0835765	0.0916556	0.0920841	0.0926953	0.0719014	0.0835556	0.073681	0.0739638
1094	A_55_P2026291	Smarce1	NM_020618	5.57875	5.45083	5.50977	6.13742	5.74415	5.3741	5.67185	5.2342	5.84038	5.4884	6.12796	5.15966
1095	A_55_P2107957	Fam175a	NM_172405	0.39102	0.377124	0.358274	0.319073	0.316425	0.359428	0.375854	0.383501	0.348128	0.330662	0.370872	0.337673
1096	A_55_P2036994	Zic3	XM_006527969	0.00700684	0.00679675	0.00681218	0.0065199	0.0092724	0.00941855	0.0451402	0.00778547	0.00759742	0.00723791	0.00827972	0.00989093
1097	A_55_P2075692	Trpm3	NM_001035245	0.160781	0.176047	0.195611	0.136184	0.147797	0.112641	0.200469	0.195771	0.177484	0.191597	0.186887	0.198645
1098	A_51_P230098	Pbk	NM_023209	0.0513408	0.09293	0.117154	0.0458639	0.0462677	0.0301943	0.060178	0.0638059	0.0335167	0.023003	0.0527144	0.00994003
1099	(+)E1A_r60_3	E1A_r60_3	E1A_r60_3	0.0248326	0.0191089	0.0240899	0.023622	0.0422155	0.012188	0.0197996	0.0384369	0.00765032	0.0124348	0.0167034	0.00996378
1100	A_51_P348652	Spast	NM_016962	4.68811	4.65022	4.85537	4.87281	5.00418	4.60359	5.45541	3.80709	5.96308	4.80276	5.09846	5.42889
1101	A_55_P2067620	ENSMUST00000103302	ENSMUST00000103302	0.00708509	0.00970709	0.00824999	0.00659719	0.00938556	0.0382344	0.00880917	0.0124737	0.0138323	0.0121764	0.00929734	0.0100154
1102	A_30_P01026906	chr12:70213282-70225157_R	chr12:70213282-70225157_R	0.0708456	0.0567952	0.0681343	0.0652037	0.0830136	0.123322	0.0797651	0.0626074	0.0495731	0.050867	0.0394638	0.049065
1103	A_30_P01027328	chr4:146124275-146149125_R	chr4:146124275-146149125_R	0.0184443	0.0121475	0.0384784	0.0107631	0.0283135	0.141213	0.0104736	0.0384101	0.019234	0.0334471	0.0211423	0.0237264
1104	A_30_P01024720	chr6:67016874-67030651_F	chr6:67016874-67030651_F	0.0353638	0.0367351	0.0478817	0.0540016	0.0205507	0.0382613	0.0604548	0.046831	0.0270812	0.0185186	0.00849311	0.0136348
1105	A_51_P411297	Nup50	NM_016714	1.39062	1.35877	1.2934	1.39739	1.22474	1.38562	1.28852	1.30626	1.29668	1.44036	1.4529	1.39436
1106	A_30_P01024846	chr2:118408095-118415745_F	chr2:118408095-118415745_F	0.00896272	0.0120268	0.0130814	0.028929	0.0112453	0.0218743	0.00895301	0.0206006	0.0178488	0.0182802	0.00854646	0.0101459
1107	A_66_P102271	Tas2r136	NM_181276	0.0071915	0.0162225	0.00703254	0.00669942	0.0230541	0.00969413	0.00898228	0.00802545	0.00779353	0.00740876	0.00857335	0.0101719
1108	A_55_P2052465	NAP029844-1	NAP029844-1	0.00721006	0.00698644	0.00705334	0.00671678	0.0504355	0.0314765	0.00901271	0.00804685	0.00781151	0.00742409	0.00859958	0.010198
1109	A_30_P01020580	chr2:151992806-152025456_R	chr2:151992806-152025456_R	0.601138	0.507172	0.582782	0.607767	0.660463	0.733966	0.639771	0.597307	0.758463	0.468916	0.612555	0.910767
1110	A_30_P01033442	chr18:63226635-63227111_R	chr18:63226635-63227111_R	0.0530204	0.0575628	0.0313002	0.0620337	0.0608008	0.0911876	0.135869	0.0654128	0.056915	0.0554837	0.0593824	0.0558221
1111	A_55_P2106404	A_55_P2106404	A_55_P2106404	0.0142904	0.0126507	0.0217872	0.0163381	0.0117311	0.0158894	0.0249738	0.00977387	0.0143055	0.00823479	0.0134745	0.0398127
1112	A_55_P2160628	Kalrn	NM_177357	0.0551458	0.0493864	0.0470543	0.0412552	0.0465395	0.0554206	0.0350946	0.04917	0.0438277	0.0490044	0.0351213	0.0371392
1113	A_51_P481768	Tcstv1	NM_018756	0.00730411	0.00706499	0.00715376	0.0118849	0.00968653	0.00984813	0.00915813	0.017773	0.00789617	0.00748987	0.00872216	0.0103261
1114	A_55_P2055888	A_55_P2055888	A_55_P2055888	0.00732362	0.0070804	0.0071751	0.00682009	0.0674039	0.00987437	0.00918642	0.00817881	0.00791233	0.0075011	0.00874423	0.0103503
1115	A_30_P01020880	chr14:55671783-55680316_R	chr14:55671783-55680316_R	0.487024	0.533119	0.358776	0.66216	0.709886	0.545037	0.606781	0.549787	0.677399	0.59742	0.619865	0.669425
1116	A_51_P124568	Mpp1	NM_008621	7.17514	7.42101	6.28269	7.40503	7.09117	7.55222	7.28892	6.79193	7.33372	8.04686	7.44959	7.35251
1117	A_55_P2178743	Commd7	ENSMUST00000147822	0.0207783	0.0249207	0.0169229	0.0317687	0.00977786	0.0361522	0.0798134	0.0417222	0.0259785	0.00752869	0.00880384	0.010419
1118	A_55_P2113940	Gm9776	NR_045619	0.120715	0.108799	0.148226	0.145196	0.121315	0.124522	0.142008	0.121574	0.0777313	0.0708863	0.0798145	0.103467
1119	A_30_P01022105	chr1:93744621-93825321_R	chr1:93744621-93825321_R	0.54311	0.48706	0.61338	0.477605	0.559206	0.484742	0.505484	0.626162	0.506443	0.371352	0.464669	0.512931
1120	A_30_P01018631	chr13:74642700-74701900_F	chr13:74642700-74701900_F	0.0487133	0.0302004	0.0427616	0.0480767	0.0367646	0.0288425	0.115234	0.0346141	0.0248041	0.0209617	0.0110904	0.0104793
1121	A_55_P2093720	Dnajc5	NM_001271585	0.739049	0.564543	0.493829	0.619699	0.643676	0.634399	0.514634	0.438879	0.627953	0.676487	0.550346	0.599993
1122	A_30_P01024877	chr9:88577769-88614651_R	chr9:88577769-88614651_R	0.0107345	0.007169	0.00729474	0.00692635	0.00987223	0.0121885	0.122346	0.00832591	0.00800186	0.00822407	0.0109842	0.0105132
1123	ETG09_35454	ETG09_35454	ETG09_35454	0.00747188	0.00717524	0.00730511	0.00693649	0.00989059	0.0100467	0.0438062	0.00833937	0.00800808	0.00755104	0.00888114	0.0105295
1124	A_55_P2122688	Zmym3	NM_019831	13.4943	13.4012	15.3991	13.6296	12.6204	12.8637	13.6153	14.1668	12.9429	12.0688	13.2226	11.1606
1125	A_55_P2013705	C230004F18Rik	AK082088	0.304849	0.286891	0.302206	0.328877	0.332791	0.3264	0.388505	0.34524	0.391139	0.319023	0.393398	0.430012
1126	A_30_P01032659	chr17:6806500-6861042_F	chr17:6806500-6861042_F	0.00751222	0.00718647	0.00732703	0.00695839	0.00992079	0.010078	0.00946258	0.00837115	0.0080141	0.00754054	0.00889232	0.0105671
1127	A_55_P2071581	Gm7710	AK158912	0.428343	0.299818	0.690243	0.403114	0.361998	0.571622	0.245933	0.527732	0.413381	0.178507	0.549612	0.492192
1128	A_55_P2025855	Hnrnpul1	NM_144922	0.81698	0.925033	1.03168	0.776495	0.779672	0.941152	1.24152	0.8941	0.727977	0.727384	0.902672	0.959877
1129	A_51_P521307	Olfr1512	NM_146432	0.00753986	0.00718328	0.00733325	0.00696763	0.00993744	0.0100908	0.00949695	0.00838797	0.00800214	0.00751142	0.00888097	0.0105891
1130	A_55_P2067161	Usp26	NM_031388	0.00754649	0.0119808	0.020208	0.0154043	0.0163422	0.0534405	0.00950465	0.0158297	0.0140564	0.0157258	0.017409	0.0105918
1131	A_55_P2070940	Krtap20-2	NM_001163615	0.497761	0.414792	0.516588	0.461091	0.485978	0.591358	0.539635	0.546162	0.44172	0.438186	0.382262	0.48989
1132	A_30_P01020691	chr13:26649529-26838004_R	chr13:26649529-26838004_R	0.0100668	0.0311946	0.0112524	0.00696177	0.111553	0.0100812	0.00977868	0.0124475	0.00796778	0.0192902	0.00884314	0.0206387
1133	A_52_P362111	Fam3c	NM_138587	4.92382	5.55098	4.84778	4.95852	5.66108	5.73331	5.67707	5.10574	5.85972	5.74003	5.22226	5.52637
1134	A_52_P708507	Myadml2	NM_026751	0.0836389	0.066846	0.0702281	0.0943255	0.0782249	0.0980526	0.0667705	0.0783422	0.0598061	0.0913543	0.11007	0.102081
1135	A_30_P01025445	chr10:18104309-18104881_F	chr10:18104309-18104881_F	0.0657694	0.0611211	0.0528235	0.0655831	0.123682	0.0437132	0.0773561	0.0717004	0.0739366	0.0346998	0.031508	0.0620149
1136	A_52_P605812	Ptrh1	NM_178595	4.87351	4.98609	3.81425	5.98919	6.56604	5.36702	5.99806	5.54657	5.63374	5.42838	4.30056	6.2622
1137	A_55_P2038384	Prkd3	ENSMUST00000124229	0.00754549	0.00708189	0.00725123	0.00691122	0.00986772	0.0100067	0.00948193	0.00833343	0.0078633	0.0073281	0.00871451	0.0105456
1138	A_30_P01031531	chr18:69923410-69965360_R	chr18:69923410-69965360_R	0.00753786	0.00706141	0.00722932	0.00689424	0.00984502	0.0179033	0.00947125	0.00831419	0.00783369	0.00729233	0.00867209	0.0105324
1139	A_30_P01021149	chr1:137689555-137692960_R	chr1:137689555-137692960_R	0.00752484	0.00703292	0.00720435	0.0138233	0.00981896	0.114586	0.0829458	0.00829328	0.00779999	0.00725026	0.00863603	0.0105074
1140	A_55_P2043062	Hs3st6	NM_001012402	0.826981	1.05301	0.909134	2.74135	2.08434	3.03435	1.30363	1.60764	0.833544	2.36676	2.78663	2.0864
1141	A_30_P01027529	chr17:66802920-66834745_F	chr17:66802920-66834745_F	0.00749911	0.00697545	0.00714456	0.00682835	0.00975444	0.00988404	0.00940583	0.00824065	0.00772317	0.0071641	0.00854182	0.0104569
1142	A_30_P01020850	chr7:46705675-46735750_R	chr7:46705675-46735750_R	0.00748151	0.00694101	0.00710982	0.00679988	0.0110376	0.00984393	0.0137946	0.00820907	0.00768094	0.00854126	0.00848845	0.0104262
1143	A_55_P2136793	Gm13125	NM_001115077	0.00746153	0.00690364	0.00707228	0.00676968	0.00967573	0.00980044	0.00934466	0.00817354	0.00763398	0.00706253	0.00843033	0.0103924
1144	A_30_P01032882	chr13:70762342-70776512_R	chr13:70762342-70776512_R	0.306749	0.269311	0.355936	0.283305	0.241914	0.385539	0.351677	0.262923	0.2785	0.269298	0.350541	0.323526
1145	A_55_P1992838	Socs2	NM_007706	0.991522	1.11199	1.10661	0.86812	0.918969	0.914483	1.18442	1.16627	1.07661	0.809952	0.573921	0.876405
1146	A_51_P106428	Nsmce4a	NM_001162855	7.14309	7.44528	7.35438	8.83894	7.85954	7.69198	7.22512	7.06278	8.11281	7.88387	8.07061	7.98796
1147	A_51_P123134	Ercc6l	NM_146235	0.00735525	0.0212093	0.0575803	0.0231394	0.00946335	0.0202819	0.0091715	0.0102357	0.0123224	0.00682016	0.00814971	0.0102179
1148	A_51_P124606	Nat2	NM_010874	0.14571	0.178597	0.180168	0.166785	0.171071	0.209775	0.170926	0.178524	0.168402	0.139873	0.173463	0.165444
1149	A_51_P228254	Zdhhc21	NM_026647	7.90926	8.32737	6.40846	8.0005	8.50665	8.9076	7.59424	8.36664	8.89611	8.92069	9.29759	9.4874
1150	ERCC-00012_90	ERCC-00012_90	ERCC-00012_90	0.0342263	0.0669847	0.0684916	0.0494403	0.151035	0.0629589	0.0499982	0.0637612	0.0441831	0.0434894	0.0251412	0.0734711
1151	A_55_P2170813	Pkig	NM_001164053	13.4512	14.491	12.9031	13.4362	16.0996	13.4877	14.5574	13.7562	17.131	16.1046	14.2994	14.2484
1152	A_52_P734742	Lrrc73	NM_001111142	0.484947	0.574538	0.48933	0.603541	0.474892	0.402577	0.564294	0.665885	0.440023	0.67152	0.559607	0.396178
1153	A_55_P1986306	Ltv1	NM_181470	4.50191	4.40735	3.74249	4.84963	5.13302	4.4318	4.824	4.367	5.42264	5.07251	4.96937	4.40554
1154	A_30_P01028727	chr13:28490070-28492645_R	chr13:28490070-28492645_R	0.137506	0.125824	0.105901	0.130922	0.131431	0.12679	0.0796368	0.139752	0.170499	0.0857085	0.133038	0.100876
1155	A_55_P2037812	Palmd	NM_023245	4.5468	5.41245	3.95791	6.24043	6.06813	6.46651	5.45167	5.54867	5.86959	6.454	6.21856	5.57067
1156	A_30_P01023787	chr4:135896689-135918414_R	chr4:135896689-135918414_R	0.00808863	0.00759933	0.00744805	0.00703073	0.0104795	0.0110556	0.00963958	0.0954593	0.0175416	0.0079837	0.00928462	0.010907
1157	A_52_P229044	Slc20a2	NM_011394	0.277044	0.297108	0.389011	0.319042	0.431202	0.29677	0.320262	0.336543	0.308822	0.338365	0.424962	0.344579
1158	A_55_P2055354	A_55_P2055354	A_55_P2055354	0.00818166	0.00769851	0.00754321	0.0112917	0.0253027	0.0912536	0.00973481	0.00876119	0.00878896	0.00806406	0.00935417	0.0109491
1159	A_30_P01026389	chr18:75513062-75523889_F	chr18:75513062-75523889_F	0.156051	0.242639	0.0788465	0.0708821	0.302586	0.130976	0.0931521	0.0821479	0.121186	0.119463	0.0473537	0.0571751
1160	A_30_P01032107	chr12:5303823-5379098_F	chr12:5303823-5379098_F	0.0391239	0.0196043	0.0277597	0.0387607	0.047566	0.0256227	0.134159	0.0186931	0.0230699	0.0235101	0.0421049	0.0109793
1161	A_30_P01022239	chr14:44146705-44149729_R	chr14:44146705-44149729_R	0.0235992	0.0110697	0.0182724	0.00726612	0.109426	0.0112052	0.175967	0.0088681	0.0232283	0.0125923	0.0207013	0.0109905
1162	A_30_P01032868	chr2:77146893-77155643_F	chr2:77146893-77155643_F	0.080029	0.0769512	0.0664363	0.0829544	0.0955227	0.0437364	0.140116	0.0881133	0.0300248	0.0348788	0.0317198	0.0411048
1163	A_55_P2064063	Casp14	NM_009809	0.209908	0.178312	0.19227	0.197145	0.232097	0.225711	0.207069	0.254717	0.198445	0.174435	0.217731	0.198374
1164	A_52_P130787	Kcna6	NM_013568	43.9232	45.4138	48.5265	45.1325	44.4624	43.5528	47.4163	50.7583	47.5681	41.5511	43.6146	48.0543
1165	A_55_P1960708	Setd1a	NM_178029	2.41416	2.69519	2.56368	2.48196	2.64159	2.60873	2.40035	2.93554	2.82465	2.78254	2.95089	2.66929
1166	A_51_P210143	Syne2	NM_001005510	1.31126	1.1301	1.47208	0.845945	0.969667	1.07153	1.22941	1.29997	1.12183	0.894253	1.04724	1.29537
1167	A_55_P2005330	Egln2	NM_053208	4.49052	4.54544	4.25726	5.02014	4.6071	5.09646	4.43338	5.13903	4.71558	5.16365	4.87933	5.29819
1168	A_66_P110251	Tmem91	NM_177102	1.48318	1.18595	1.52212	1.2437	1.44399	1.35688	1.35994	1.33821	1.05636	1.12779	1.04825	1.26464
1169	A_30_P01023438	chr18:5808025-5818625_R	chr18:5808025-5818625_R	0.0411938	0.00826028	0.0275457	0.0305191	0.0108976	0.0112258	0.0111023	0.0089912	0.0320957	0.0131439	0.0132236	0.0109707
1170	A_30_P01032826	chr8:108098325-108110775_R	chr8:108098325-108110775_R	0.00841837	0.00797009	0.017649	0.00747592	0.171594	0.339241	0.00996303	0.0159762	0.0115171	0.00828365	0.00943786	0.0109599
1171	A_52_P49014	Shh	NM_009170	0.476087	0.514368	0.565033	0.471318	0.419778	0.76658	0.616016	0.518403	0.516743	0.540706	0.596543	0.523783
1172	A_51_P305230	Elavl3	NM_010487	13.0393	12.8031	14.0182	13.4159	12.9493	13.4045	14.1406	15.2631	14.4088	12.6995	13.4753	13.7877
1173	A_55_P2124140	ENSMUST00000096324	ENSMUST00000096324	0.0542291	0.0489152	0.0574212	0.0462427	0.0553914	0.0250286	0.0421874	0.0552533	0.0531629	0.0349481	0.0209334	0.0363138
1174	A_55_P2353181	C130030K03Rik	AK048022	0.163421	0.177771	0.192951	0.130995	0.256243	0.104493	0.16972	0.145265	0.118127	0.151628	0.102536	0.0881544
1175	A_51_P120066	9330151L19Rik	NR_033222	1.16824	1.42613	1.39579	1.41801	1.52002	1.57268	1.18694	1.27796	1.26659	1.44456	1.41445	1.28608
1176	A_55_P1982532	A_55_P1982532	A_55_P1982532	0.181671	0.150067	0.121865	0.166347	0.170424	0.145091	0.163903	0.157394	0.105098	0.0705844	0.100017	0.122611
1177	A_51_P210350	Slc17a8	NM_182959	2.33858	2.08102	1.84066	2.19462	2.09947	2.14544	2.12489	2.2034	2.25147	1.99114	1.70968	2.03335
1178	A_52_P448466	BC004004	NM_030561	1.32729	1.44446	1.1937	1.41811	1.3441	1.5456	1.50106	1.58356	1.50708	1.60556	1.52067	1.60347
1179	A_55_P2125947	Agpat2	NM_026212	0.343543	0.32502	0.367318	0.319657	0.524859	0.295515	0.332871	0.350244	0.316839	0.294349	0.336152	0.300631
1180	A_30_P01024466	chr12:12876192-12918398_F	chr12:12876192-12918398_F	0.00830912	0.00788909	0.00772298	0.00745391	0.0107565	0.0109404	0.00981142	0.00886936	0.0088758	0.00817814	0.00921537	0.0133813
1181	A_51_P247799	Casp8	NM_009812	0.244826	0.310038	0.306941	0.191224	0.312409	0.29797	0.224143	0.152188	0.20274	0.248276	0.168992	0.190652
1182	A_30_P01028804	chr11:22510175-22522025_F	chr11:22510175-22522025_F	0.00826512	0.00785006	0.0119134	0.0074264	0.0646613	0.0108641	0.00975639	0.00882248	0.00882363	0.00813809	0.00915314	0.0106798
1183	A_30_P01023905	chr12:82495575-82516300_F	chr12:82495575-82516300_F	0.314372	0.402836	0.353061	0.498511	0.562989	0.486238	0.40735	0.324229	0.484926	0.480653	0.38464	0.423646
1184	A_52_P476560	Tpcn1	NM_145853	8.01148	7.19432	7.50529	8.96865	8.11103	8.68522	7.803	8.00362	7.20778	8.99974	10.1205	8.15615
1185	A_55_P2113984	Mospd2	NM_001290523	0.497496	0.494149	0.500887	0.500223	0.446017	0.682484	0.658689	0.464162	0.50195	0.45446	0.501021	0.512136
1186	A_30_P01032173	chr8:87504644-87513694_F	chr8:87504644-87513694_F	0.00816069	0.00775782	0.00759364	0.00735483	0.0105648	0.0179451	0.0326009	0.0087141	0.00870426	0.00804219	0.00901639	0.0105548
1187	A_55_P2030160	Tcf7l2	NM_001142920	0.28216	0.245761	0.306861	0.239004	0.420893	0.230533	0.416241	0.368356	0.25133	0.244675	0.274149	0.307927
1188	A_30_P01024143	chr17:8088950-8106700_F	chr17:8088950-8106700_F	0.0081029	0.00770594	0.00754222	0.00731246	0.185753	0.126161	0.0362263	0.00865395	0.0086387	0.00798952	0.00894422	0.0137742
1189	A_55_P1967473	Efcab1	ENSMUST00000090277	0.292023	0.28134	0.347325	0.345807	0.346208	0.593752	0.341387	0.283612	0.293554	0.332937	0.295449	0.299362
1190	A_55_P2130997	D830050J10Rik	AK142706	0.00804191	0.0109306	0.0120614	0.00943834	0.010411	0.0195797	0.0411819	0.0233841	0.00857124	0.00793459	0.00887095	0.0199645
1191	A_30_P01019928	chr12:83271350-83357214_F	chr12:83271350-83357214_F	0.415842	0.544881	0.687008	0.457237	0.479984	0.503057	0.505322	0.568525	0.518343	0.515302	0.432049	0.455928
1192	A_52_P249424	Vegfa	NM_001025257	0.484465	0.423866	0.469868	0.538275	0.475595	0.511998	0.495093	0.561543	0.431248	0.526619	0.620218	0.533955
1193	A_30_P01021325	chr14:65430484-65432413_R	chr14:65430484-65432413_R	19.2687	19.4444	16.759	20.3279	20.2047	19.3807	19.2831	21.1242	20.51	20.4108	20.5062	18.3449
1194	A_52_P73126	Epb4.2	NM_013513	0.00791264	0.0115832	0.00895176	0.00716741	0.143727	0.020322	0.00954745	0.00846089	0.00842946	0.0281995	0.0560696	0.0227027
1195	A_55_P1952828	A_55_P1952828	A_55_P1952828	0.345568	0.367829	0.352883	0.278463	0.536636	0.342797	0.632056	0.325989	0.402197	0.298302	0.32925	0.335562
1196	A_55_P2009817	Ssxb6	NM_001205108	0.00784673	0.00747132	0.00731712	0.0142779	0.0101635	0.0153908	0.122593	0.00839456	0.00835768	0.00776308	0.00865092	0.0139304
1197	A_55_P2162204	Kctd15	NM_146188	8.72902	9.07956	8.80185	9.65055	8.358	9.22186	8.06893	8.24692	9.12566	9.02641	8.92456	8.75447
1198	A_55_P2031811	A_55_P2031811	A_55_P2031811	0.00777979	0.0250287	0.0250116	0.033426	0.0198753	0.032512	0.00919844	0.0255437	0.0204989	0.00777039	0.0136895	0.0147087
1199	A_55_P1993323	Olfr873	NM_146561	0.00774611	0.00738057	0.00722764	0.00703586	0.0100392	0.0101123	0.00916179	0.00829305	0.00824689	0.00767669	0.00854263	0.0101335
1200	A_55_P1964737	A_55_P1964737	A_55_P1964737	0.00771343	0.00735305	0.00720076	0.00700904	0.00999551	0.010068	0.0124232	0.00826214	0.00821403	0.00764805	0.00851033	0.0101029
1201	A_30_P01023213	chr17:3004525-3086000_R	chr17:3004525-3086000_R	0.00768286	0.00732182	0.00717205	0.00698262	0.00995494	0.0100228	0.172374	0.00822982	0.00817865	0.00762097	0.00847605	0.010073
1202	A_55_P1957865	A_55_P1957865	A_55_P1957865	0.00968105	0.00729183	0.00714392	0.00695398	0.00991222	0.108393	0.0288886	0.00819566	0.00814391	0.0102009	0.00844367	0.0185048
1203	A_52_P289685	Ssbp1	NM_028358	4.3009	4.81287	4.2459	5.07847	4.94597	4.90308	4.6796	4.52551	5.08844	5.03618	4.4797	4.75057
1204	A_52_P346113	Foxn2	NM_180974	0.374296	0.358716	0.471365	0.301554	0.51256	0.316445	0.627798	0.386772	0.3918	0.412943	0.489589	0.349796
1205	A_55_P2294059	2900035I09Rik	AK032244	0.1169	0.0495484	0.00706063	0.0453281	0.172102	0.112003	0.280729	0.00810336	0.0812482	0.0435469	0.109906	0.032377
1206	A_51_P115374	Pot1b	NM_028370	0.0323759	0.00948145	0.0444515	0.0611596	0.0299239	0.0360769	0.0327652	0.0442501	0.0204777	0.0199251	0.0241432	0.0375682
1207	A_55_P1959041	Fam115e	NM_203396	0.00869174	0.00714781	0.00700714	0.00931568	0.00971633	0.00977925	0.00888053	0.008043	0.00968428	0.00745726	0.00828613	0.0170344
1208	A_55_P2022663	A_55_P2022663	A_55_P2022663	43.6991	46.4806	44.2794	41.1302	39.9125	40.9815	40.2058	34.6623	40.3781	46.1467	38.6826	42.4701
1209	A_51_P369784	Ces1e	NM_133660	0.00742748	0.008791	0.0186892	0.0139735	0.159617	0.0158848	0.00881959	0.0188143	0.010214	0.0151548	0.00823048	0.0129737
1210	A_51_P211854	Selp	NM_011347	0.1985	0.176553	0.202584	0.207241	0.184159	0.196528	0.291433	0.157746	0.161112	0.174926	0.192056	0.200383
1211	A_30_P01018426	chr14:106250821-106261843_R	chr14:106250821-106261843_R	0.0073696	0.00704196	0.00690795	0.00673013	0.015182	0.108298	0.0241197	0.00793238	0.00785362	0.00736081	0.024766	0.0145852
1212	A_30_P01028912	chr16:46384974-46391331_R	chr16:46384974-46391331_R	0.44657	0.594605	0.36682	0.57234	0.391801	0.475438	0.461826	0.326808	0.406203	0.365004	0.294401	0.499636
1213	A_55_P2406802	4930511J24Rik	AK015759	0.00731454	0.0123961	0.0068624	0.00711714	0.181187	0.00956648	0.226117	0.00787722	0.00779747	0.00731736	0.00812937	0.00976161
1214	A_30_P01023351	chr9:56910620-56919495_R	chr9:56910620-56919495_R	0.00728689	0.00696769	0.00684066	0.0111812	0.21124	0.0549061	0.276838	0.0078534	0.00777078	0.00729578	0.00810661	0.00974112
1215	A_55_P2086203	Kcnq1	NM_008434	0.0788689	0.0806345	0.0925586	0.121284	0.0793722	0.130651	0.119039	0.0969277	0.126986	0.117658	0.0860535	0.096564
1216	A_52_P122822	Wdfy2	NM_175546	0.181774	0.168907	0.191795	0.200688	0.179833	0.175536	0.141621	0.220284	0.160387	0.21762	0.221946	0.21872
1217	A_30_P01029138	chr10:5950116-5958250_R	chr10:5950116-5958250_R	0.0433763	0.0323166	0.0449329	0.042469	0.0271382	0.0339661	0.173798	0.0356986	0.0524154	0.0490211	0.0832662	0.0812064
1218	A_55_P2164503	A_55_P2164503	A_55_P2164503	1.08995	1.39417	1.43164	0.883906	0.7868	0.849696	1.42114	1.19641	1.2555	0.826064	0.66238	0.802451
1219	A_55_P2127265	NAP115344-1	NAP115344-1	83.9912	82.3138	69.9035	82.4189	78.7448	78.5873	76.9628	67.7903	82.5466	89.4258	79.3738	84.8931
1220	A_55_P2004821	Olfr1417	NM_146936	0.0456877	0.0489093	0.0290618	0.0308039	0.423359	0.0311598	0.0333511	0.0551009	0.0285404	0.0212534	0.0190533	0.0348626
1221	A_55_P2046096	A_55_P2046096	A_55_P2046096	0.0345424	0.044079	0.0735144	0.0550701	0.0996652	0.0373513	0.145697	0.0694123	0.0460568	0.0317912	0.0415173	0.0326739
1222	A_55_P2183592	A_55_P2183592	A_55_P2183592	0.780982	0.736517	0.67476	0.662041	0.777061	0.659027	0.826013	0.722932	0.6848	0.682797	0.707829	0.751904
1223	A_55_P2101137	Olfr1123	NM_146350	0.00708142	0.00678941	0.00668303	0.0111007	0.00980624	0.00930389	0.018872	0.00767277	0.00757118	0.00743659	0.007954	0.00960121
1224	A_55_P2037689	A_55_P2037689	A_55_P2037689	3.53168	3.85801	2.47704	4.26608	3.95151	3.59279	3.87401	3.46046	4.17977	4.75711	3.44868	3.91824
1225	A_51_P257065	Prpf40b	NM_018786	1.36263	1.25	1.39118	1.55223	1.4502	1.28821	1.50363	1.43401	1.40682	1.45181	1.50511	1.37484
1226	A_55_P2039225	Rap1gap	NM_001081155	14.0266	14.315	12.7438	16.4829	15.314	14.5422	14.387	13.9769	15.1494	16.4984	16.2735	15.2827
1227	A_30_P01020434	chr6:142915873-142938323_F	chr6:142915873-142938323_F	0.179279	0.179919	0.17934	0.169322	0.237235	0.209825	0.213166	0.186463	0.181237	0.160439	0.158675	0.173391
1228	A_30_P01022682	chr5:144517700-144526071_F	chr5:144517700-144526071_F	0.0682595	0.0489518	0.066493	0.0622471	0.0784662	0.0521465	0.256587	0.0490584	0.0514505	0.0507547	0.0347509	0.051718
1229	A_30_P01025405	chr6:47967403-47968278_R	chr6:47967403-47968278_R	0.147195	0.134129	0.149851	0.139729	0.147692	0.156617	0.144824	0.158516	0.102675	0.103202	0.10574	0.100011
1230	A_55_P2056393	Stk11ip	NM_027886	2.98359	2.23768	1.93718	2.65669	2.57878	2.59059	2.6184	2.2696	2.29968	2.50571	2.24406	2.73859
1231	A_30_P01024859	chr3:145390505-145398253_F	chr3:145390505-145398253_F	0.00695991	0.00910279	0.00660635	0.00640824	0.00910013	0.152591	0.00839014	0.0147499	0.00746416	0.0070689	0.00790026	0.0100261
1232	A_55_P1976829	TC1686095	TC1686095	0.226524	0.19522	0.188884	0.205843	0.258633	0.198872	0.307671	0.213892	0.122616	0.125397	0.151694	0.138467
1233	A_66_P111781	4930432M17Rik	NM_001033814	2.77481	2.49874	2.21411	2.50508	2.60994	2.55703	2.5878	2.51506	2.61276	2.6327	2.45448	2.56512
1234	A_30_P01029062	chr4:126710640-126721240_F	chr4:126710640-126721240_F	0.855427	0.735742	1.14412	0.799011	0.932583	1.03292	0.729864	1.10221	0.901731	0.644377	0.854241	0.840824
1235	A_52_P505157	Fsd2	NM_172904	0.00692246	0.00666517	0.00659166	0.00638393	0.00906606	0.0389212	0.00837394	0.00756111	0.0074375	0.00705428	0.00790312	0.00955047
1236	A_66_P140507	Lhpp	NM_029609	0.110315	0.116043	0.120962	0.0992214	0.0986006	0.189456	0.119378	0.0928071	0.100109	0.115106	0.0917837	0.0784457
1237	A_30_P01027633	chr11:99048975-99062425_F	chr11:99048975-99062425_F	0.0320481	0.0322676	0.0354412	0.0192274	0.0568616	0.159368	0.0340457	0.0309629	0.00742859	0.0135267	0.0225103	0.0181208
1238	A_52_P157450	Abhd1	NM_021304	0.832084	0.511247	0.845623	0.125707	0.167246	0.931751	0.768455	0.469412	0.769502	0.120576	0.846922	0.500901
1239	A_55_P2013143	Esrp2	NM_176838	0.0567529	0.0438627	0.0431102	0.0517221	0.134753	0.103571	0.055036	0.045481	0.02381	0.02132	0.020917	0.0305342
1240	A_55_P1954693	Tac1	NM_009311	48.577	56.6464	37.7653	88.3765	68.0639	78.5389	64.5527	63.6441	77.0479	72.9433	64.8897	70.1361
1241	A_30_P01024384	chr6:30983012-31009987_F	chr6:30983012-31009987_F	0.00689597	0.00665304	0.0065992	0.00637455	0.00905494	0.00916173	0.00885179	0.00779645	0.0074289	0.00705982	0.00794225	0.00958324
1242	A_52_P367520	Nexn	NM_199465	2.15873	2.53251	2.02036	2.63249	2.5071	2.34517	2.35535	2.36287	2.27804	2.82347	2.93001	2.44878
1243	A_30_P01018306	chr6:47687025-47728525_R	chr6:47687025-47728525_R	0.832678	0.781341	0.847561	0.868185	0.923683	1.08475	0.72603	0.970451	0.684541	0.74361	0.713522	0.44238
1244	A_52_P118560	Kynu	NM_027552	0.00689581	0.00666035	0.00661646	0.0138357	0.00906417	0.160027	0.00841008	0.00757964	0.00743742	0.00707463	0.00797979	0.00961455
1245	A_52_P1087486	Catsper1	NM_139301	0.00689766	0.00914328	0.0221048	0.017311	0.0390966	0.0877746	0.053274	0.00758652	0.00744345	0.0148455	0.00799127	0.00962534
1246	A_55_P2010962	Surf6	NM_009298	3.37691	3.20831	3.54198	3.29369	3.28179	3.05473	3.3489	3.20003	3.49025	3.09194	2.9739	3.22618
1247	A_30_P01033293	chr15:74476233-74476296_F	chr15:74476233-74476296_F	0.00690412	0.00667363	0.00664057	0.00639609	0.0193902	0.00920746	0.082311	0.00760443	0.00745628	0.00709624	0.00802216	0.0096533
1248	A_51_P359549	Fem1c	NM_173423	0.795101	0.754853	0.795345	0.706916	0.652558	0.73387	0.818297	0.772746	0.747572	0.715888	0.723448	0.76996
1249	A_55_P2051592	Gfm2	NM_177266	1.50445	1.72301	1.52387	1.61704	1.68396	1.89927	1.60868	1.66061	1.51606	1.75091	1.45213	1.76272
1250	A_55_P2110081	Cisd3	NM_001085500	12.0992	13.177	10.7846	14.4624	13.484	13.3783	13.8949	14.142	14.4856	14.5072	13.8609	15.9295
1251	ERCC-00148_99	ERCC-00148_99	ERCC-00148_99	0.490382	0.469326	0.503874	0.442291	0.579981	0.510001	0.604552	0.526623	0.253306	0.215138	0.253905	0.304033
1252	A_51_P454993	Tmcc2	NM_178874	0.702643	0.637791	0.778933	0.624079	0.696281	0.792647	0.670781	0.68419	0.660178	0.610122	0.593949	0.630103
1253	(+)E1A_r60_1	E1A_r60_1	E1A_r60_1	377.503	371.343	373.567	341.125	334.543	361.2	386.731	410.898	399.215	374.794	399.152	503.476
1254	A_51_P382512	Zfp418	NM_146179	0.129478	0.161246	0.14758	0.109047	0.123116	0.131273	0.122714	0.132946	0.151299	0.0907093	0.0978823	0.155845
1255	A_51_P187171	Smim12	NM_030252	12.8292	12.6237	11.2665	13.8063	12.5913	15.222	12.5793	12.8431	12.6155	14.6976	17.0415	16.1658
1256	A_55_P2142575	Tdrd5	NM_001134741	0.0978376	0.0952787	0.0949296	0.221895	0.171917	0.211351	0.233766	0.0498451	0.0997577	0.209544	0.202966	0.232845
1257	A_55_P1968593	Olfr1505	NM_001011850	0.044189	0.0281682	0.0508671	0.0574193	0.0523279	0.0527129	0.344039	0.0618003	0.0345315	0.0226196	0.0509397	0.039393
1258	A_55_P2237129	St6galnac5	ENSMUST00000044278	1.56144	1.69456	1.44043	1.71225	1.81521	1.63433	2.02299	1.87675	1.99931	1.68505	1.68148	1.76648
1259	A_55_P2146847	Olfr681	NM_207557	0.015768	0.00679771	0.0104548	0.00988723	0.0226859	0.0161406	0.00867177	0.00778229	0.00760396	0.0102606	0.0113178	0.0176301
1260	A_55_P2372528	4122401K19Rik	AK014465	0.12178	0.125884	0.143278	0.156855	0.129944	0.1276	0.468235	0.183284	0.172091	0.175374	0.193114	0.137072
1261	A_55_P2141876	Ldha	NM_001136069	3.85172	3.94452	2.9956	4.29942	4.17189	4.36336	4.26862	4.0037	4.34251	5.04539	4.32132	4.54736
1262	A_55_P2091676	Fas	NM_007987	0.333374	0.351139	0.483689	0.418945	0.529902	0.445626	0.430045	0.324235	0.42221	0.466855	0.380954	0.328739
1263	A_55_P2163682	LOC102642943	XM_006543347	0.403893	0.453898	0.367459	0.398733	0.435231	0.517193	0.407483	0.358558	0.400558	0.380705	0.353923	0.345082
1264	ERCC-00104_60	ERCC-00104_60	ERCC-00104_60	0.00709005	0.00687313	0.00690817	0.00659771	0.00938725	0.0095354	0.00880268	0.00911074	0.00769009	0.00731981	0.00908971	0.0100104
1265	A_55_P2136765	Uqcr10	NM_197979	13.1076	13.7625	12.8686	14.6829	13.9669	13.825	14.0367	13.0466	14.8709	14.6517	13.9877	15.3521
1266	A_51_P369516	Nudt16l1	NM_025839	11.1281	11.3217	8.95284	12.5513	12.4054	11.9165	12.0385	12.7556	11.8091	12.8869	12.2818	13.824
1267	A_52_P155708	Creg1	NM_011804	0.235538	0.208789	0.187319	0.254386	0.188951	0.231711	0.206805	0.121272	0.160767	0.258448	0.216149	0.190979
1268	A_52_P352563	1700073E17Rik	NR_003625	27.6724	29.1599	28.4857	28.5202	27.6946	28.1996	29.3573	23.4484	30.036	32.4205	28.0865	29.741
1269	A_52_P188042	Trat1	NM_198297	0.0071777	0.00695642	0.00951994	0.0110162	0.00951257	0.00966598	0.00894675	0.00799866	0.00865409	0.00740011	0.0085489	0.0101416
1270	A_51_P334789	Nudt16	NM_029385	1.52924	1.71569	1.48286	1.90894	1.62163	1.67257	1.65779	1.61419	1.69265	1.77938	1.61722	1.78958
1271	A_52_P682990	Timm50	NM_025616	1.73403	1.72393	1.65133	1.65171	1.61186	1.71367	1.47561	1.64184	1.69012	1.93885	1.80829	1.76835
1272	A_30_P01031369	chr6:50339188-50409363_F	chr6:50339188-50409363_F	0.0253298	0.0177218	0.00707461	0.0270572	0.0129328	0.0580569	0.0218261	0.0159574	0.0193939	0.025824	0.0114241	0.0102222
1273	A_52_P534235	Srms	NM_011481	0.0792751	0.0801147	0.0641944	0.070352	0.0653094	0.0863972	0.129486	0.0980543	0.067053	0.0822024	0.047824	0.0681212
1274	A_30_P01032656	chr2:132079092-132086642_F	chr2:132079092-132086642_F	0.0300514	0.00816737	0.0298111	0.0402165	0.0265809	0.0313244	0.1174	0.0199043	0.0494298	0.0360421	0.0225894	0.0163971
1275	A_55_P2157809	Gm12	NM_001195544	0.00784619	0.0091864	0.00713755	0.00678746	0.00966429	0.00982312	0.00912442	0.00813667	0.0134896	0.00748785	0.00904831	0.0102997
1276	A_55_P1969792	BX514557	BX514557	0.00731084	0.00706975	0.00715369	0.0134909	0.00969069	0.0124882	0.009156	0.0154755	0.00790749	0.0101375	0.00872608	0.0103239
1277	A_30_P01019480	chr17:74580316-74599991_R	chr17:74580316-74599991_R	0.125115	0.150109	0.144324	0.12172	0.186648	0.112359	0.110068	0.144347	0.121595	0.129233	0.143318	0.130231
1278	A_30_P01021978	chr7:4827340-4863315_R	chr7:4827340-4863315_R	0.00762964	0.00709818	0.011383	0.006838	0.0999243	0.00989793	0.00921056	0.0082026	0.00932714	0.00752295	0.0204433	0.0103738
1279	A_55_P2113633	Bzw1	NM_025824	2.29168	2.39889	2.33049	2.18682	2.2925	2.23259	2.45347	2.39045	2.3671	2.30709	2.40958	2.45411
1280	A_30_P01019682	chr14:72400656-72400887_F	chr14:72400656-72400887_F	0.00738594	0.00712518	0.0072294	0.00686902	0.00978538	0.0294814	0.0101976	0.00824344	0.00796866	0.00754219	0.00881311	0.01042
1281	A_30_P01028354	chr6:66216675-66234475_R	chr6:66216675-66234475_R	0.0159272	0.00721679	0.0204886	0.0290514	0.0146114	0.0608884	0.00929242	0.0156893	0.0173426	0.0179826	0.0173511	0.0104419
1282	A_30_P01032080	chr18:70400082-70404236_R	chr18:70400082-70404236_R	0.0133252	0.00714942	0.0184554	0.0305815	0.0348221	0.0277357	0.0318633	0.0099152	0.00798933	0.0309519	0.0249952	0.0246043
1283	A_55_P2111713	Spint2	NM_001082548	4.04568	3.43146	3.53578	3.28983	3.78918	3.56996	3.88533	3.74324	3.88323	3.65589	3.6978	4.75115
1284	ETG04_27747	ETG04_27747	ETG04_27747	0.00745472	0.00716983	0.00729029	0.00692337	0.00986657	0.0100249	0.00936685	0.0083163	0.00801272	0.00756674	0.00887683	0.0105021
1285	A_55_P1954501	D3Bwg0562e	NM_177664	0.101349	0.10266	0.138696	0.108409	0.111585	0.116417	0.343849	0.13514	0.0632433	0.0725719	0.0639665	0.0720529
1286	A_55_P1958996	Cxxc4	NM_001004367	0.257805	0.274994	0.232715	0.328621	0.338237	0.300439	0.359989	0.239866	0.265162	0.325189	0.293175	0.3277
1287	A_55_P2058143	Pclo	NM_001110796	0.485034	0.457259	0.405038	0.616339	0.465144	0.49744	0.551425	0.472116	0.452512	0.490631	0.516459	0.500521
1288	A_55_P2057803	6330403A02Rik	NM_001081227	0.0320417	0.0338789	0.0812144	0.0576106	0.0564413	0.0460145	0.0477228	0.0469977	0.0316513	0.0322909	0.0400048	0.0559383
1289	A_55_P2122135	Olfr907	NM_146805	0.0710234	0.0991774	0.0982307	0.0765878	0.115143	0.0755693	0.107288	0.0736968	0.0596092	0.0812768	0.0794066	0.0854624
1290	A_55_P2117993	Cep63	AK137058	0.398799	0.337705	0.412177	0.428541	0.366758	0.393755	0.471943	0.408687	0.201574	0.219448	0.257074	0.254466
1291	A_30_P01032301	chr14:47978277-47985238_F	chr14:47978277-47985238_F	0.498176	0.429325	0.409978	0.518621	0.215381	0.550442	0.479474	0.482978	0.425796	0.457543	0.414936	0.392271
1292	A_55_P2159685	Kcnj3	NM_008426	0.115427	0.079919	0.0821781	0.109534	0.116544	0.113324	0.0927681	0.0810153	0.100562	0.132216	0.0919934	0.133566
1293	A_55_P2024468	Tbkbp1	NM_198100	0.0646304	0.0442147	0.0617868	0.0490179	0.0562498	0.103182	0.10627	0.0619923	0.0536265	0.0605982	0.0392896	0.0573406
1294	A_30_P01029181	chr5:44173484-44176009_F	chr5:44173484-44176009_F	0.00756747	0.0110642	0.00734501	0.0069843	0.0181707	0.0745243	0.00952121	0.00840519	0.00801237	0.00750958	0.00888688	0.0106096
1295	A_30_P01025233	chr16:59557120-59602070_F	chr16:59557120-59602070_F	0.209687	0.205022	0.265211	0.182551	0.229775	0.192623	0.230139	0.221128	0.13109	0.120328	0.117287	0.13591
1296	A_55_P2186978	ENSMUST00000177795	ENSMUST00000177795	0.00757642	0.022904	0.00733276	0.0149434	0.00995195	0.0245928	0.134012	0.0084	0.0117759	0.0074716	0.00885877	0.0189137
1297	ERCC-00085_231	ERCC-00085_231	ERCC-00085_231	0.00757762	0.00716339	0.00732255	0.0083522	0.00994399	0.0100875	0.0481009	0.00839339	0.00797067	0.00744902	0.00884004	0.0106028
1298	A_55_P2026903	Tigit	NM_001146325	0.0075765	0.00714924	0.00731138	0.0069597	0.00993401	0.0100752	0.00952393	0.00838476	0.00794975	0.00742618	0.00881346	0.0105973
1299	A_51_P423091	Flot1	NM_008027	19.9969	21.2626	21.119	23.7017	26.1243	28.2961	28.5234	27.6034	27.9155	29.7001	27.5755	22.077
1300	A_55_P1970494	A_55_P1970494	A_55_P1970494	0.0239262	0.00832625	0.00827696	0.0301563	0.0528736	0.0253306	0.0311412	0.0100271	0.0280085	0.0215695	0.020121	0.0105725
1301	A_30_P01028599	chr1:75075500-75102200_R	chr1:75075500-75102200_R	0.0637738	0.0352873	0.0670498	0.0543308	0.0479857	0.0605934	0.048302	0.0632166	0.051274	0.0518305	0.0451414	0.0523554
1302	A_55_P1971774	Fsip1	NM_027759	0.0634154	0.0460087	0.0496953	0.0694704	0.0235709	0.214824	0.0182126	0.013031	0.0363218	0.0796185	0.0358112	0.0296835
1303	A_52_P582555	Rbm48	NM_172991	0.218536	0.209088	0.199554	0.189099	0.168097	0.334768	0.373172	0.147801	0.178598	0.215024	0.227371	0.209782
1304	A_55_P2015842	Mtmr3	NM_028860	0.171311	0.129755	0.102024	0.117859	0.103093	0.141414	0.206755	0.109797	0.124355	0.168246	0.0975804	0.10623
1305	A_52_P101982	Tmem129	NM_026698	4.28028	3.89724	3.99945	4.66434	4.41196	4.2378	4.51493	3.99582	4.0549	4.24181	4.20043	4.044
1306	A_51_P498720	Cacna2d1	NM_009784	10.8992	11.0079	13.5698	7.89652	7.17309	8.45892	12.0051	11.8956	10.4525	6.0076	6.7808	6.9202
1307	A_55_P2141817	TC1688140	TC1688140	0.0074732	0.00690338	0.00706882	0.00677284	0.0096777	0.00980042	0.00934377	0.00817502	0.00763701	0.00705873	0.00842594	0.0103971
1308	A_55_P2094019	Slc17a4	NM_177016	0.00744855	0.00686057	0.00702707	0.00673846	0.00963039	0.00975057	0.0113743	0.00813547	0.00758208	0.00700203	0.00836127	0.0103583
1309	ERCC-00042_60	ERCC-00042_60	ERCC-00042_60	0.00742184	0.00748024	0.098458	0.0120053	0.00957886	0.0103572	0.00960972	0.0112375	0.00752592	0.0202687	0.00829191	0.0103153
1310	A_51_P187679	Slc9b1	NM_028946	0.013623	0.00809153	0.055618	0.0130135	0.00952269	0.0152135	0.00990783	0.00804439	0.0162232	0.00766272	0.00821903	0.0102692
1311	A_55_P2013775	D730005E14Rik	NR_030675	0.0152897	0.0163608	0.0121111	0.0153208	0.00946211	0.00957439	0.010798	0.00799335	0.00818434	0.00881615	0.00814094	0.0102187
1312	A_30_P01030871	chr7:31709550-31723025_F	chr7:31709550-31723025_F	0.120595	0.0913368	0.12291	0.104879	0.0736857	0.139657	0.0893217	0.10213	0.134508	0.111145	0.120152	0.103577
1313	A_55_P1975685	Nup37	NM_028334	1.60827	1.66327	1.44616	1.75768	1.77603	1.57623	1.78274	1.34981	1.7594	1.78501	1.792	1.76558
1314	A_51_P509223	Arfgap1	NM_145760	0.601173	0.559452	0.659503	0.554573	0.624307	0.564798	0.571223	0.546682	0.559617	0.640836	0.62177	0.613289
1315	A_66_P110817	Mterfd1	NM_025547	0.782637	0.697459	0.798074	0.765409	0.809288	0.755207	0.731188	0.751055	0.770651	0.687282	0.814787	0.790955
1316	A_55_P1994688	Strip2	NM_001037740	0.0591294	0.0375907	0.0463068	0.0507149	0.054531	0.0322057	0.0497524	0.0589593	0.0215174	0.036383	0.0268306	0.0125435
1317	A_30_P01027250	chr2:176598132-176602354_R	chr2:176598132-176602354_R	0.0754107	0.0408465	0.0680562	0.0636268	0.0367555	0.0595573	0.0297759	0.0701982	0.0407162	0.0611193	0.0514734	0.0846898
1318	A_55_P2010936	Fbxo17	NM_015796	1.75908	1.59722	1.80142	1.75501	1.96266	1.55961	2.0302	1.66162	1.97844	1.58584	1.52254	1.48749
1319	A_30_P01031995	chr12:76744947-76778372_R	chr12:76744947-76778372_R	0.00961551	0.0279091	0.0398096	0.0386038	0.0543938	0.0167251	0.0204488	0.0228061	0.0306783	0.0245464	0.0154811	0.0108959
1320	A_55_P2178094	A_55_P2178094	A_55_P2178094	0.00807952	0.00759379	0.00759219	0.00702213	0.0104667	0.0110569	0.00963701	0.0112003	0.00868848	0.00798646	0.00928684	0.0109256
1321	A_52_P109319	E2f5	NM_007892	0.349907	0.416799	0.367912	0.370694	0.36394	0.367021	0.416066	0.359979	0.384692	0.388021	0.410313	0.338661
1322	A_55_P2159780	Mob1a	NM_145571	0.0554432	0.0724455	0.118522	0.0746183	0.108674	0.0741109	0.0970751	0.0991897	0.0860198	0.0761205	0.101703	0.0940412
1323	A_52_P357611	Neu3	NM_016720	0.236545	0.244027	0.279853	0.283352	0.20648	0.304378	0.247883	0.177086	0.222259	0.212355	0.245285	0.181559
1324	A_66_P131896	Olfr117	NM_207155	0.00825285	0.00777684	0.00761949	0.00722679	0.0106913	0.0111948	0.00982018	0.00883648	0.0101773	0.00814516	0.00941243	0.011001
1325	A_51_P358894	Ttc9b	NM_028417	3.64724	4.0537	2.92792	3.74179	3.97966	3.99118	3.69773	4.21794	4.21695	4.28657	4.3854	4.61833
1326	A_55_P2184889	A_55_P2184889	A_55_P2184889	0.00831994	0.00784517	0.00768702	0.00730551	0.0267738	0.0112352	0.00988405	0.00889921	0.00893106	0.00820169	0.00944824	0.0110218
1327	ERCC-00043_129	ERCC-00043_129	ERCC-00043_129	0.00834199	0.00924556	0.0184109	0.0137891	0.0403922	0.0112489	0.0938856	0.0183177	0.00895688	0.00822748	0.0115545	0.0110259
1328	A_30_P01028295	chr14:78957377-78963514_F	chr14:78957377-78963514_F	0.105705	0.124412	0.118061	0.1455	0.0991551	0.119866	0.0853753	0.111815	0.116566	0.0804095	0.0926222	0.0922877
1329	A_30_P01017931	chr1:138570107-138632310_F	chr1:138570107-138632310_F	0.27498	0.289688	0.287984	0.277737	0.308131	0.331597	0.326522	0.310747	0.237157	0.25068	0.209456	0.189196
1330	A_55_P2003333	BB203186	BB203186	0.0164494	0.0270969	0.066603	0.0212938	0.0247892	0.0293242	0.0308215	0.0251082	0.0200188	0.0113396	0.00948002	0.0237011
1331	A_51_P120461	Mina	NM_025910	0.945576	1.35707	0.999548	1.41618	1.06438	0.943816	1.14959	1.02809	1.12264	1.00583	1.01715	0.839439
1332	A_55_P1983523	Cd300ld	NM_145437	0.392306	0.411347	0.420163	0.399468	0.423183	0.468101	0.366971	0.389586	0.381811	0.350493	0.391245	0.509576
1333	A_55_P2045855	Zfp944	NM_176962	0.0640122	0.101374	0.111465	0.111113	0.104347	0.0893967	0.113047	0.099465	0.131574	0.0949474	0.134083	0.177565
1334	A_30_P01018669	chr3:93570498-93588934_F	chr3:93570498-93588934_F	0.00843061	0.00798092	0.00781892	0.00748805	0.0109199	0.0112369	0.00998546	0.00900567	0.00903614	0.00830613	0.00945851	0.023312
1335	A_55_P2186395	LOC102640775	XM_006519761	0.0729725	0.0683159	0.0568142	0.0551859	0.158743	0.421984	0.0576981	0.057755	0.070798	0.0486757	0.0610181	0.0722609
1336	A_51_P165182	Batf2	NM_028967	0.513052	0.521125	0.310329	0.260837	0.378713	0.337705	0.320951	0.322388	0.20509	0.458383	0.167557	0.20005
1337	A_52_P418644	Plp2	NM_019755	2.08416	2.32691	1.92802	1.94058	1.89189	1.77884	2.02903	1.70555	2.04624	1.98613	1.56811	1.35908
1338	A_55_P2082050	Ankrd12	NM_001025572	2.07151	2.13753	2.36895	2.08325	2.65034	2.104	2.05006	2.17661	2.0493	1.82467	2.10427	2.18067
1339	A_30_P01028807	chr13:37633225-37640309_F	chr13:37633225-37640309_F	0.0897877	0.0583802	0.0624283	0.0510665	0.212185	0.0539343	0.0862803	0.0809957	0.0314517	0.0374273	0.0456444	0.0354053
1340	A_51_P240269	Fam199x	NM_146261	0.149504	0.163855	0.172721	0.140934	0.19902	0.15565	0.156818	0.162871	0.175304	0.122995	0.136062	0.194837
1341	A_51_P134007	Ncl	NM_010880	13.7635	13.4829	13.8645	13.1201	13.3346	13.7947	12.9992	11.0732	13.8966	14.4241	12.7614	12.8621
1342	A_55_P1973264	Spint5	NM_001040055	0.00836728	0.00793964	0.00777569	0.00749371	0.0108341	0.0110413	0.00988593	0.00892954	0.012716	0.00823945	0.00930066	0.0108233
1343	ERCC-00057_123	ERCC-00057_123	ERCC-00057_123	0.00834968	0.00792493	0.0077611	0.0074846	0.0108114	0.0110079	0.0227386	0.00891053	0.00892422	0.00822261	0.00927233	0.0107946
1344	ERCC-00098_150	ERCC-00098_150	ERCC-00098_150	0.00833033	0.00790987	0.00785943	0.015137	0.0107863	0.0109723	0.00984089	0.0238342	0.00890373	0.00820483	0.103368	0.0107673
1345	A_30_P01020828	chr4:133368314-133380210_R	chr4:133368314-133380210_R	0.0747182	0.0686641	0.0707852	0.0637581	0.0719843	0.719217	0.05791	0.0744164	0.0400644	0.0523892	0.0572556	0.0756673
1346	A_30_P01029870	chr1:63264155-63345773_R	chr1:63264155-63345773_R	0.00828729	0.00787027	0.0190585	0.0166591	0.0351421	0.0884779	0.0162177	0.0233603	0.0168378	0.010157	0.0135861	0.022589
1347	A_55_P2194798	A230056J06Rik	NR_045633	0.0499397	0.0315218	0.0437754	0.0458121	0.0902555	0.0490059	0.106957	0.0251929	0.0274391	0.0149163	0.025329	0.0381275
1348	A_30_P01017929	chr1:53215418-53244461_R	chr1:53215418-53244461_R	0.00823817	0.00782694	0.0136181	0.0157376	0.0106665	0.010815	0.154738	0.0332691	0.00885851	0.0119178	0.00911413	0.0106493
1349	A_30_P01023419	chr6:120613889-120648725_R	chr6:120613889-120648725_R	0.0151202	0.00780359	0.00764162	0.00739627	0.0106326	0.396844	0.256208	0.0178587	0.00876338	0.00809487	0.00907977	0.0106176
1350	A_55_P2057984	Tbc1d19	NM_144517	4.6272	4.57645	4.44941	4.73284	4.23074	4.52785	4.91884	3.95623	4.52853	4.72303	4.14179	3.92555
1351	A_55_P2170094	Lrrc27	NM_001143755	2.20027	1.94278	1.87071	2.00873	2.1676	2.09363	2.08736	1.99872	1.91447	1.97276	1.85792	1.8658
1352	A_55_P2118694	Nkd1	NM_027280	0.0363613	0.0313064	0.0696622	0.0430466	0.282346	0.114251	0.133382	0.061316	0.0620137	0.0468031	0.0474552	0.0471168
1353	A_52_P223524	Dennd6b	NM_027081	0.820654	0.71784	0.777149	0.841427	0.83241	1.1032	0.858926	0.95209	0.918401	1.01038	0.936044	0.867171
1354	A_30_P01023275	chr10:66559716-66647841_F	chr10:66559716-66647841_F	0.0231535	0.0214722	0.0135293	0.0158154	0.0104451	0.019086	0.0294031	0.0225362	0.0200513	0.0105394	0.00889939	0.0484865
1355	ERCC-00025_93	ERCC-00025_93	ERCC-00025_93	0.0312265	0.0158204	0.022278	0.0205438	0.172692	0.0173358	0.00948628	0.118849	0.0169975	0.0108309	0.0146246	0.0243967
1356	3xSLv1	3xSLv1	3xSLv1	0.0080033	0.00761396	0.00745632	0.00724144	0.0661258	0.0660354	0.00944947	0.00854949	0.00852921	0.00790479	0.0088254	0.0103875
1357	A_55_P2009013	Dpf2	NM_001291078	11.8128	11.7635	10.0683	12.6428	12.657	12.3903	12.7959	12.4283	13.7516	13.2902	12.9377	13.4638
1358	A_55_P2020592	Trim3	NM_001285873	1.42179	1.22789	1.32194	1.23361	1.24067	1.38521	1.38286	1.39558	1.28588	1.44971	1.28537	1.22916
1359	A_30_P01023676	chr8:60132300-60146830_F	chr8:60132300-60146830_F	0.0732412	0.0673605	0.0576764	0.0858681	0.26039	0.057652	0.0774414	0.063308	0.055344	0.0321496	0.0651299	0.0609013
1360	A_51_P102518	Tmem225	NM_029379	0.0486562	0.0113446	0.0407671	0.0467108	0.254328	0.0444775	0.122717	0.0350229	0.0271723	0.0224108	0.0317093	0.0282391
1361	A_66_P126110	Pcdh11x	NM_001271809	0.00783874	0.00746379	0.0225981	0.033844	0.0306266	0.0550656	0.144797	0.010732	0.00834944	0.0243495	0.0205471	0.0193781
1362	A_51_P365859	Sowaha	NM_183173	0.117153	0.0846677	0.112144	0.102562	0.0841215	0.115198	0.0866093	0.0818808	0.0966069	0.0906684	0.135233	0.123061
1363	A_55_P2004283	AK156149	AK156149	0.00777191	0.00740284	0.00725238	0.00705811	0.0100705	0.0327218	0.00918828	0.00831667	0.00827741	0.00770231	0.00857032	0.0101593
1364	A_30_P01032262	chr13:104591573-104599048_F	chr13:104591573-104599048_F	0.0923047	0.0591958	0.0810797	0.0954871	0.0868141	0.0812936	0.077035	0.0723131	0.0385462	0.035141	0.052951	0.0558888
1365	A_55_P2010197	Serpina10	NM_144834	0.245106	0.246198	0.277663	0.225479	0.228534	0.247681	0.301213	0.25698	0.291888	0.179074	0.173908	0.231902
1366	A_66_P100113	Dynlt1a	NM_001166629	0.0528294	0.0846471	0.0768226	0.0580007	0.0686613	0.0587722	0.155529	0.0986497	0.117048	0.0430287	0.0456417	0.0421973
1367	A_55_P2093528	ENSMUST00000048921	ENSMUST00000048921	0.00763953	0.0072821	0.00713755	0.00695114	0.00990504	0.0307522	0.00904269	0.00818644	0.00813593	0.00758791	0.0084338	0.0100364
1368	A_55_P2041514	4930550L24Rik	NM_023774	0.00924259	0.0188256	0.0115247	0.00692433	0.00986386	0.0099254	0.017769	0.00815418	0.0119722	0.0183007	0.00840134	0.0140411
1369	A_55_P1962329	Trim61	NM_153110	0.0317876	0.0128513	0.0393066	0.035756	0.069474	0.0131596	0.140645	0.0286236	0.0102539	0.0126787	0.0275061	0.0193789
1370	A_51_P126365	Gzmn	NM_153052	0.00754358	0.0071946	0.00705635	0.0131	0.00978065	0.00984398	0.0636278	0.00809113	0.00803427	0.00750673	0.00833931	0.00995253
1371	A_30_P01022189	chr9:96964067-96973567_F	chr9:96964067-96973567_F	0.00750844	0.00716612	0.00702789	0.0068468	0.0317799	0.00980423	0.00890515	0.00806187	0.00800137	0.00748006	0.00830906	0.00992401
1372	A_52_P543792	Qrich1	NM_175143	0.279206	0.22437	0.279682	0.266612	0.299942	0.282053	0.258451	0.209632	0.254832	0.269832	0.2627	0.297445
1373	A_51_P502764	Hdac10	NM_199198	1.87572	1.97515	1.98651	2.03016	2.22381	1.97346	2.0796	2.21841	2.26027	2.17396	2.27753	2.13103
1374	A_55_P2076215	Prokr2	AK082195	0.0133687	0.00708437	0.00695109	0.00677223	0.0100023	0.00969162	0.0232873	0.00797475	0.0079073	0.00740554	0.0108945	0.00984751
1375	A_51_P170565	4933411G11Rik	NM_177880	0.0448194	0.0484361	0.0504876	0.0404114	0.0269544	0.0550772	0.0355015	0.0319389	0.0348517	0.0157891	0.0221698	0.0300837
1376	A_30_P01032871	chr8:56200419-56205756_F	chr8:56200419-56205756_F	0.033416	0.0155231	0.0242765	0.0247041	0.0355263	0.0769033	0.017412	0.0226454	0.0155144	0.0074122	0.0240614	0.00980079
1377	ERCC-00085_231	ERCC-00085_231	ERCC-00085_231	0.00733469	0.00700769	0.00688037	0.00670253	0.156067	0.00958775	0.00872253	0.0102515	0.0078205	0.00733651	0.00814792	0.00977746
1378	A_51_P237106	Olfr1211	NM_001011804	0.0823486	0.0700684	0.082852	0.0924208	0.15351	0.0807553	0.170664	0.0871359	0.0257509	0.0322023	0.038371	0.0429591
1379	A_30_P01030751	chr7:71093563-71095094_F	chr7:71093563-71095094_F	24.9744	24.0679	24.4826	24.341	27.5452	31.048	26.5268	25.0643	25.2142	26.0453	29.7913	35.1933
1380	A_52_P518270	Tmem255a	NM_172930	0.602777	0.513342	0.400639	0.731162	0.707113	0.690251	0.591121	0.474156	0.615941	0.69917	0.602943	0.605118
1381	A_30_P01029534	chr1:139856545-139857204_F	chr1:139856545-139857204_F	0.113798	0.147559	0.172587	0.175295	0.155057	0.177581	0.119412	0.226796	0.121378	0.0875795	0.115562	0.146167
1382	A_30_P01021961	chr7:28797929-28798370_R	chr7:28797929-28798370_R	0.180045	0.113747	0.188137	0.152945	0.164869	0.176307	0.251172	0.160216	0.142766	0.0907878	0.160951	0.147305
1383	A_30_P01026338	chr16:3111550-3130500_R	chr16:3111550-3130500_R	0.0471008	0.0409221	0.0122087	0.0170441	0.271511	0.0292206	0.135772	0.243554	0.0333738	0.299435	0.317455	0.0376224
1384	A_30_P01031495	chr12:83271350-83357214_R	chr12:83271350-83357214_R	0.00716057	0.00685464	0.00910398	0.00885276	0.0650216	0.00938606	0.0085517	0.00773682	0.0076482	0.00720229	0.00800853	0.00965124
1385	A_51_P115159	Fam162a	NM_027342	11.9327	11.7453	10.9539	13.7628	13.8904	12.9283	12.5609	11.297	14.1459	14.062	12.4742	13.9872
1386	A_55_P2064721	4921534A09Rik	AK084767	0.0268842	0.0232591	0.0304713	0.0261262	0.0761792	0.0157408	0.0723075	0.0247778	0.0136972	0.0272373	0.00797922	0.0284336
1387	A_51_P103499	Spesp1	NM_025721	0.0201055	0.0185664	0.0311052	0.0225086	0.0170886	0.0212895	0.0160552	0.0282764	0.0156998	0.0139482	0.0271468	0.009612
1388	A_51_P197259	Cct7	NM_007638	29.861	29.2633	24.9702	29.4348	28.3614	29.3577	27.6565	26.7557	31.134	31.8638	29.1096	31.9634
1389	A_51_P520927	Ccdc97	NM_028771	4.55287	4.53272	4.23645	4.57331	4.55851	4.5788	4.36338	4.69367	4.45838	4.75137	4.83766	5.05246
1390	A_51_P102122	Myog	NM_031189	0.010732	0.0117614	0.0198227	0.0294446	0.0264184	0.0122073	0.0417321	0.0215764	0.00753908	0.00712153	0.0173781	0.0095826
1391	A_30_P01025481	chrX:96586066-96586407_F	chrX:96586066-96586407_F	0.0132857	0.0197097	0.0308632	0.0104446	0.0177841	0.00924678	0.0340773	0.021988	0.0294799	0.0264126	0.00792746	0.0161468
1392	A_55_P2075449	Ttll3	NM_001142732	0.137953	0.138938	0.197245	0.0965775	0.229949	0.134351	0.122385	0.165527	0.0885979	0.0927137	0.130457	0.128672
1393	A_55_P2141093	Eya2	NM_010165	2.52818	2.54897	3.38263	2.44821	1.78311	2.01262	2.32305	2.35579	2.05858	2.21743	2.29551	2.04357
1394	A_52_P399095	Mettl24	NM_177793	0.0780093	0.0696407	0.11378	0.0477018	0.0507518	0.129681	0.0416801	0.0695073	0.0555314	0.0667056	0.0624997	0.0735654
1395	A_52_P413492	Ldlrap1	NM_145554	0.147128	0.167939	0.206882	0.134918	0.110486	0.242295	0.125708	0.120666	0.128081	0.151392	0.131844	0.11746
1396	A_52_P269158	Pid1	NM_001003948	0.943363	0.850856	0.96797	0.763465	0.719763	0.861411	0.714761	0.705954	0.728129	0.772451	0.854532	0.7599
1397	A_55_P2077548	Git1	NM_001004144	9.26075	8.89341	9.54348	9.28712	9.11722	8.93999	8.81222	8.58158	9.13842	9.42302	9.87555	8.80412
1398	A_55_P2008895	Tmsb15b1	NM_001081983	0.786701	0.785456	0.660808	0.602925	0.635669	0.967193	0.576172	0.881648	0.614789	0.971905	0.99439	1.06365
1399	A_65_P20433	Parpbp	NM_029249	0.0494951	0.0740357	0.0470833	0.0564593	0.0814338	0.0973475	0.074256	0.0707866	0.0621944	0.0556133	0.0536592	0.0438898
1400	A_51_P123314	Olfr74	NM_054091	0.178756	0.192429	0.181706	0.189173	0.198118	0.173803	0.223697	0.216534	0.120195	0.139475	0.108092	0.13636
1401	A_55_P1962503	Nup62cl	NM_001081668	0.0069213	0.00666294	0.0068865	0.00638469	0.0090687	0.100762	0.00837737	0.00756185	0.00744159	0.00922581	0.00791642	0.00955998
1402	A_30_P01030152	chr2:77146893-77155643_F	chr2:77146893-77155643_F	0.0198624	0.0114527	0.018264	0.0183201	0.0316401	0.0214801	0.0391682	0.0434228	0.0120433	0.0215435	0.0134051	0.0144746
1403	A_55_P2002849	Aifm3	NM_001291070	3.40374	3.66034	3.53762	4.86324	4.47707	4.46831	3.56522	3.73773	3.48669	4.94487	5.93389	5.01869
1404	A_55_P2066207	TC1609840	TC1609840	0.00690824	0.00665725	0.00851654	0.00638001	0.147596	0.0154515	0.00869206	0.0109688	0.0244697	0.00706443	0.00793647	0.00957627
1405	A_51_P117226	Zdhhc2	ENSMUST00000049389	15.7541	16.0478	13.1658	17.7312	17.2682	15.1812	16.6589	18.2276	17.4961	17.3559	17.6261	18.7974
1406	A_66_P118091	Tor3a	NM_023141	0.146385	0.192011	0.131818	0.134874	0.125238	0.140606	0.102631	0.095085	0.131846	0.16167	0.136807	0.130663
1407	A_55_P2027327	Usp1	NM_146144	1.07798	1.13135	1.32014	1.16433	1.09013	1.09754	1.03933	1.12847	1.01239	1.08187	1.1938	0.981957
1408	A_51_P486308	Ccdc171	NM_001081012	0.0974369	0.0778395	0.0836399	0.102267	0.0957894	0.298834	0.0787787	0.0908222	0.0837037	0.0935901	0.100439	0.136622
1409	A_51_P100776	Zfp169	NM_026450	0.16366	0.135988	0.175737	0.182451	0.169203	0.190327	0.17569	0.16193	0.135054	0.137976	0.179891	0.193853
1410	A_30_P01024249	chr1:139814266-139817889_R	chr1:139814266-139817889_R	0.00690865	0.0066709	0.00663426	0.011122	0.0209653	0.00919769	0.085972	0.00759505	0.00745707	0.00709396	0.00800792	0.0096377
1411	A_30_P01029126	chr18:46646048-46659873_F	chr18:46646048-46659873_F	0.0858697	0.0620296	0.0571084	0.0689768	0.0789934	0.0681663	0.153355	0.0635351	0.0400735	0.0343735	0.03223	0.0339234
1412	A_52_P383089	Cd4	NM_013488	0.0457728	0.061943	0.0745669	0.0486157	0.0613773	0.049129	0.208804	0.0631444	0.0575518	0.0347929	0.042672	0.0529166
1413	A_52_P275649	Eras	NM_181548	0.00692121	0.00668932	0.00666336	0.00925235	0.00911392	0.0421032	0.00846902	0.00762455	0.00748004	0.00711927	0.00805723	0.00968143
1414	A_52_P479269	Sdc1	NM_011519	1.60318	1.97068	2.4679	0.784909	0.920415	1.04662	1.57735	1.58186	1.44268	0.729571	0.614907	0.59653
1415	A_55_P2005930	ENSMUST00000079818	ENSMUST00000079818	6.54967	7.02067	6.6854	6.46464	6.07532	6.39081	6.11223	4.96694	6.7941	7.4477	6.21551	7.02791
1416	A_55_P2034979	Vav2	NM_009500	0.278915	0.23176	0.219643	0.25773	0.360774	0.248116	0.268766	0.29953	0.272391	0.261206	0.212411	0.241274
1417	A_51_P462546	Gmppa	NM_133708	2.73497	1.92992	2.30979	2.35962	1.92564	2.38369	2.42477	2.37972	2.2172	2.3647	1.83029	2.24218
1418	A_55_P1978481	Nr1h2	NM_009473	11.7782	11.2688	10.7201	12.1556	12.209	12.2336	11.5007	11.2228	11.2192	12.6983	12.6279	12.2198
1419	A_51_P167292	Chil3	NM_009892	0.28501	2.46112	0.316602	0.453155	0.250548	1.58586	0.878659	3.04372	1.0796	4.00556	9.87634	1.68293
1420	A_30_P01027647	chr4:131734714-131741964_R	chr4:131734714-131741964_R	0.113083	0.126419	0.110859	0.0981605	0.113818	0.107515	0.134722	0.136946	0.0767143	0.0734904	0.059631	0.0970634
1421	ERCC-00131_64	ERCC-00131_64	ERCC-00131_64	0.00699303	0.00677099	0.00677563	0.00649486	0.0092364	0.00936885	0.258104	0.00774199	0.00757724	0.00721675	0.00822877	0.00983641
1422	A_30_P01022702	chr6:23105525-23118900_F	chr6:23105525-23118900_F	0.159444	0.147835	0.170172	0.104207	0.136594	0.137192	0.227973	0.121305	0.131056	0.0977626	0.116748	0.149755
1423	A_30_P01031906	chr18:63525907-63526504_R	chr18:63525907-63526504_R	1.8641	1.96677	1.43579	2.30585	1.95558	2.0702	1.91939	2.1977	2.59083	1.82459	1.62064	3.01045
1424	A_30_P01023834	chr5:124485370-124502361_R	chr5:124485370-124502361_R	0.00703411	0.00681207	0.00682913	0.00653613	0.00929716	0.0094348	0.0409535	0.00779872	0.00762569	0.00726123	0.00830424	0.00990579
1425	A_30_P01027628	chr6:83541250-83560425_F	chr6:83541250-83560425_F	0.585828	0.765725	0.591465	0.636303	0.579362	0.651795	0.564352	0.544967	0.621705	0.738197	0.61862	0.614085
1426	A_55_P2174646	Smr3a	NM_011422	0.00706219	0.00684176	0.00686704	0.00656666	0.00934155	0.00948212	0.00874176	0.00783936	0.00765983	0.0124365	0.0127349	0.00995451
1427	A_66_P123683	Nabp1	NM_028696	0.0625408	0.0867105	0.0683899	0.0679263	0.061777	0.0645844	0.0820176	0.0758765	0.0924456	0.0653335	0.0896462	0.0630881
1428	A_55_P1999765	ENSMUST00000109511	ENSMUST00000109511	0.0198517	0.00687302	0.0279781	0.0200487	0.0118666	0.0147942	0.0271965	0.0204512	0.0179853	0.026315	0.019032	0.0359922
1429	A_51_P146044	Ccdc92	NM_144819	37.7475	37.0305	34.4336	39.777	36.3604	40.5418	37.244	37.3434	35.4964	41.5369	39.4529	40.1645
1430	A_30_P01029988	chr13:112717680-112733330_F	chr13:112717680-112733330_F	0.0407475	0.0408174	0.0420467	0.0374856	0.0339121	0.0788532	0.0301504	0.0430239	0.0209486	0.0140359	0.0328884	0.052012
1431	A_52_P601782	Mb21d1	NM_173386	0.00714566	0.00692234	0.00696895	0.00664936	0.00946264	0.139921	0.0171917	0.0137789	0.00783047	0.00737291	0.00849345	0.0100836
1432	A_51_P117739	Figf	NM_010216	0.534196	0.601542	0.562637	0.626586	0.586445	0.593808	0.558642	0.568193	0.55454	0.519805	0.526653	0.451118
1433	A_30_P01030578	chr4:129497990-129515290_F	chr4:129497990-129515290_F	0.418272	0.242087	0.458893	0.263567	0.388334	0.396229	0.237553	0.377083	0.285066	0.245207	0.334715	0.299727
1434	A_55_P2142430	Bank1	NM_001033350	0.114324	0.153081	0.115744	0.15209	0.15229	0.141843	0.105928	0.105022	0.172422	0.167242	0.194062	0.105879
1435	A_51_P175232	Fbxl4	NM_172988	2.25249	2.35844	2.08047	2.36891	2.3031	2.48898	2.69545	2.16067	2.3085	2.52453	2.56603	2.45167
1436	A_30_P01024144	chr12:12768528-12849976_F	chr12:12768528-12849976_F	0.296637	0.258366	0.252644	0.236045	0.279755	0.283445	0.291945	0.280614	0.208416	0.221183	0.251247	0.220863
1437	A_51_P102911	Hoxa11	NM_010450	0.00725822	0.0381552	0.130824	0.0578361	0.0301573	0.0309951	0.18954	0.0502236	0.0313501	0.0745015	0.0185223	0.0263657
1438	A_51_P198076	Mien1	NM_025559	19.763	19.7549	17.5859	20.2338	21.2413	18.5499	22.3704	18.8513	22.1954	22.1152	20.4307	21.1419
1439	A_51_P100997	Serpinb3c	NM_201363	0.252592	0.274807	0.21577	0.217431	0.239497	0.234266	0.250086	0.233869	0.169893	0.199983	0.172203	0.229829
1440	A_55_P2212503	5730457N03Rik	NR_038163	0.00731653	0.0070717	0.00715774	0.019039	0.00969484	0.00984913	0.00914776	0.00815781	0.0116038	0.00750956	0.00873296	0.0103226
1441	A_55_P2058487	Gm4419	XR_394313	0.155828	0.156568	0.192046	0.160254	0.253193	0.184644	0.182352	0.153603	0.166449	0.179129	0.18377	0.156642
1442	A_51_P116581	Ccdc22	NM_138603	3.64727	4.09633	3.95053	4.4475	4.01683	4.29857	4.24578	4.20673	4.1595	4.08254	4.317	4.63529
1443	A_55_P2424988	C78228	C78228	0.387757	0.301999	0.361012	0.284747	0.387283	0.407982	0.337022	0.392494	0.270671	0.263544	0.315251	0.318914
1444	A_55_P1959017	LOC102635037	XR_376984	0.0891657	0.0519483	0.0624254	0.0703096	0.0895827	0.166605	0.0807529	0.0734811	0.0780915	0.0570233	0.0657831	0.071487
1445	A_51_P258766	Smo	NM_176996	5.29218	5.62151	6.92302	4.96936	5.24943	4.85916	4.68114	5.02997	4.75123	5.34411	5.76349	4.81298
1446	A_30_P01019146	chr2:128211990-128215223_R	chr2:128211990-128215223_R	0.0424383	0.109349	0.2054	0.167286	0.17278	0.178436	0.156863	0.0871028	0.124056	0.0991878	0.184924	0.112846
1447	A_55_P2032955	Pabpn1l	NM_001007462	0.00744707	0.00771785	0.00728215	0.00691742	0.00985657	0.0232654	0.0739365	0.00830278	0.00801811	0.00757751	0.00887391	0.0104856
1448	A_55_P2121364	Tdg	NM_172552	0.147464	0.150471	0.16413	0.162547	0.142801	0.147038	0.19698	0.144863	0.128945	0.149886	0.140797	0.128421
1449	A_55_P2076635	Vps25	NM_001284414	2.22133	2.25741	1.96884	2.412	2.27881	2.44413	2.25651	2.1618	2.2821	2.63248	2.24796	2.44322
1450	A_55_P2108948	Gjc3	NM_080450	1.41146	1.44744	1.92922	1.3972	1.50249	1.27366	1.5531	1.3826	1.28307	1.50587	1.71593	1.45033
1451	A_30_P01028229	chr13:34821764-34822230_R	chr13:34821764-34822230_R	0.00774105	0.00720345	0.00733258	0.00696441	0.00992686	0.010079	0.0688938	0.00836634	0.00805026	0.00791323	0.00892138	0.0105596
1452	A_30_P01027151	chr18:73870981-73877247_F	chr18:73870981-73877247_F	0.00752545	0.00720917	0.00734206	0.00697313	0.00994028	0.010093	0.00945225	0.00837889	0.00805446	0.0075879	0.00892779	0.0105725
1453	ERCC-00085_231	ERCC-00085_231	ERCC-00085_231	0.00753838	0.00990106	0.00734962	0.00698096	0.0099523	0.0101047	0.0094709	0.0105841	0.00805694	0.00758442	0.0089322	0.0105863
1454	A_30_P01017636	chr7:50833970-50850878_R	chr7:50833970-50850878_R	0.00755028	0.00765726	0.0130204	0.0088276	0.0099628	0.010114	0.00948615	0.0083999	0.0151037	0.00757953	0.00893494	0.0105976
1455	A_55_P2035613	Tmbim1	NM_027154	9.45606	11.573	13.6534	11.6356	11.6829	10.9888	11.7624	10.5903	11.5388	10.7099	12.9343	10.2997
1456	A_30_P01017439	chr5:107903325-107925875_F	chr5:107903325-107925875_F	0.136267	0.149662	0.124492	0.12218	0.142661	0.147049	0.164904	0.0994477	0.182551	0.157606	0.127803	0.158439
1457	ERCC-00143_89	ERCC-00143_89	ERCC-00143_89	0.00758003	0.00721508	0.00736317	0.00699857	0.00998153	0.0101285	0.00952389	0.00841812	0.00804791	0.0106873	0.00892638	0.0106212
1458	ERCC-00074_113	ERCC-00074_113	ERCC-00074_113	0.00758762	0.0072107	0.00736001	0.00699863	0.00998516	0.108902	0.00953189	0.00842023	0.00803917	0.00753791	0.00891583	0.0106249
1459	A_51_P286460	ENSMUST00000102969	ENSMUST00000102969	0.00759137	0.00720169	0.0145375	0.0223828	0.0152563	0.143224	0.0201736	0.0184041	0.0103971	0.00752054	0.00890498	0.0106284
1460	ERCC-00138_246	ERCC-00138_246	ERCC-00138_246	0.215211	0.201235	0.189226	0.152661	0.258917	0.181505	0.199532	0.172653	0.210615	0.180665	0.205758	0.229912
1461	A_55_P1986123	Sccpdh	NM_178653	22.8354	24.7989	21.4343	28.1414	24.5313	27.0885	23.6203	22.4883	23.522	28.1741	30.1017	25.9835
1462	A_30_P01027603	chr13:65581475-65593800_F	chr13:65581475-65593800_F	0.0075978	0.00717372	0.00733309	0.00698137	0.00996303	0.0101021	0.0127341	0.00840636	0.0114499	0.00745901	0.00885123	0.0106165
1463	A_52_P93066	Klhl42	NM_001081237	0.353616	0.392514	0.634212	0.556112	0.641107	0.55176	0.579897	0.468948	0.857857	0.555383	0.546486	0.362915
1464	A_55_P2138222	LOC102639901	XM_006504641	2.61173	2.45657	2.01639	2.59017	2.80378	3.06143	2.68641	2.37151	2.25522	2.88486	2.73434	2.81741
1465	A_30_P01033393	chr8:15582950-15609500_R	chr8:15582950-15609500_R	0.00758764	0.0109168	0.00935027	0.00966497	0.0142042	0.0184091	0.0148036	0.00836902	0.0140412	0.00736958	0.00876441	0.0105874
1466	A_55_P1980292	Purb	NM_011221	2.56512	2.52297	3.13279	2.65096	2.54634	2.64799	2.63757	3.04272	2.46903	2.51622	2.97773	3.12419
1467	A_30_P01027483	chr17:87674225-87682154_F	chr17:87674225-87682154_F	0.00757031	0.00707252	0.00723816	0.00691009	0.0098667	0.142007	0.131091	0.00832966	0.00785111	0.00729656	0.00868686	0.0105475
1468	A_55_P2117420	NAP095065-001	NAP095065-001	26.1446	31.2001	31.3058	23.6304	24.2131	26.1155	26.3739	23.8649	25.0824	24.8185	25.2545	23.0478
1469	A_30_P01032082	chr2:92582386-92599365_F	chr2:92582386-92599365_F	0.00754248	0.00913256	0.00717962	0.0168436	0.00980471	0.00993028	0.0270698	0.00827801	0.0077746	0.00720962	0.00859269	0.0104994
1470	A_30_P01032628	chr2:174088550-174109425_R	chr2:174088550-174109425_R	0.138196	0.108626	0.107829	0.13622	0.117619	0.141418	0.155612	0.139817	0.066304	0.0683788	0.0642814	0.0843368
1471	A_30_P01028649	chr9:75316023-75344401_F	chr9:75316023-75344401_F	0.0231462	0.0315336	0.026747	0.013414	0.00972539	0.00984771	0.0394749	0.0174261	0.0149822	0.0144569	0.00848173	0.0104359
1472	A_55_P2335529	4921531C22Rik	NR_033782	0.473606	0.366104	0.578162	0.451046	0.426808	0.494704	0.327587	0.438486	0.454978	0.288084	0.444745	0.411265
1473	A_66_P120901	Atxn10	NM_016843	12.2325	12.2133	11.0442	12.6619	12.5815	13.7937	12.9509	11.3798	12.8609	13.2374	12.1183	13.1892
1474	A_66_P138009	Gm4710	NR_033456	0.443306	0.41758	0.472909	0.387297	0.37659	0.439308	0.424694	0.380359	0.372614	0.32457	0.351127	0.39712
1475	A_30_P01027808	chr14:77006215-77063293_R	chr14:77006215-77063293_R	0.706538	0.556469	0.654507	0.662944	0.705001	0.733878	0.844733	0.715018	0.412358	0.357214	0.422314	0.462088
1476	A_51_P105124	P2ry6	NM_183168	0.692551	0.882595	1.12743	0.698236	0.557779	0.579373	0.470495	0.436393	0.581304	0.481723	0.492541	0.498452
1477	A_51_P467410	Npm1	NM_008722	23.1183	24.2304	22.4362	26.7226	27.1052	27.3647	24.4719	21.7879	29.1982	30.4547	24.8245	28.0874
1478	A_51_P211491	Gusb	NM_010368	1.73933	1.90579	1.8797	1.66108	1.56523	1.47668	1.60661	1.49238	1.76599	1.50409	1.38062	1.43768
1479	A_55_P2301312	Wdr78	NM_146254	1.09872	1.02218	1.41116	1.18113	1.29724	1.2936	1.3538	1.15302	1.66378	1.43736	1.47452	1.51564
1480	A_51_P448664	Tbxas1	NM_011539	0.252131	0.271962	0.276954	0.177451	0.13357	0.139202	0.170765	0.0848924	0.158473	0.178408	0.203851	0.118576
1481	A_51_P394154	Ddx51	NM_027156	1.22272	1.17953	1.18828	1.36423	1.32218	1.35852	1.41737	1.47808	1.38126	1.38052	1.62845	1.39153
1482	A_30_P01019175	chr3:86827945-86886695_R	chr3:86827945-86886695_R	0.00801591	0.0123366	0.00737524	0.015594	0.010386	0.0110092	0.00957657	0.00859886	0.00862323	0.00793775	0.00924505	0.0109147
1483	A_30_P01020041	chr7:128400874-128439363_F	chr7:128400874-128439363_F	0.016274	0.00758456	0.0181319	0.0124543	0.0104596	0.0231735	0.0285667	0.0117354	0.00868134	0.00798979	0.00928891	0.010943
1484	A_30_P01029672	chr17:3198868-3394643_R	chr17:3198868-3394643_R	0.00812197	0.00763789	0.00748454	0.00707502	0.0105244	0.0111016	0.00969264	0.0088197	0.00873479	0.0080358	0.00932821	0.010968
1485	A_55_P2136612	A_55_P2136612	A_55_P2136612	0.0218672	0.00768557	0.0223436	0.0149342	0.010796	0.0111374	0.0157633	0.0209252	0.00878194	0.00947102	0.0181116	0.0109895
1486	A_55_P2166262	Rnf215	NM_027859	9.98562	9.77088	9.93034	9.40706	9.62271	11.0491	10.3169	10.3314	9.75898	9.70032	10.4808	9.33308
1487	A_51_P288479	Slc25a29	NM_181328	1.11106	1.0842	1.07407	0.902606	1.0181	1.2413	0.980163	1.19873	1.19977	1.17609	1.17541	1.21056
1488	A_51_P475704	Pcdh9	NM_001271798	2.04123	2.04903	1.89329	2.002	2.08683	2.37498	2.1023	2.21349	2.04336	2.19093	2.51521	2.30478
1489	A_55_P1963639	Sycn	NM_026716	0.168522	0.162102	0.146935	0.166639	0.276513	0.147934	0.360971	0.182927	0.108183	0.120401	0.0802424	0.107433
1490	A_55_P2367350	4933403J19Rik	AK016636	0.0141358	0.023564	0.0242986	0.0386192	0.0347276	0.0112626	0.0597786	0.0344597	0.0168997	0.00823918	0.0225372	0.0110532
1491	A_55_P1958354	Rps29	NM_009093	121.788	124.329	128.947	117.256	116.714	120.713	117.861	109.061	127.467	132.928	130.513	133.873
1492	ERCC-00092_138	ERCC-00092_138	ERCC-00092_138	0.0797809	0.0775478	0.0684239	0.0573573	0.0787506	0.0508472	0.0784042	0.0579578	0.048799	0.0446967	0.0507043	0.0429085
1493	A_55_P1967015	Fgfr1	NM_010206	1.79053	1.62	1.68745	1.66117	1.79496	1.96647	1.83426	1.96956	1.79239	1.70368	1.83734	1.87725
1494	A_52_P63855	S100a7a	NM_199422	0.0349468	0.0151075	0.0242549	0.0215291	0.011216	0.0413539	0.0303467	0.0438557	0.0296185	0.0459187	0.034283	0.0194518
1495	A_55_P2092225	A_55_P2092225	A_55_P2092225	0.105881	0.0944967	0.0964655	0.0990019	0.107877	0.0918191	0.0867288	0.0841554	0.0402321	0.0787199	0.0713957	0.075543
1496	A_51_P108862	Cops7a	NM_012003	22.071	22.8834	19.721	25.1693	24.3147	24.2787	23.3237	22.101	24.1637	26.7165	24.7578	24.4768
1497	A_55_P2114656	Xpr1	ENSMUST00000129271	0.108483	0.128622	0.106872	0.137115	0.0857434	0.116749	0.137942	0.109664	0.113216	0.118996	0.0906242	0.0979719
1498	A_52_P628212	Esrrb	AK044339	0.0217903	0.0151473	0.0457939	0.0433385	0.0246657	0.0181159	0.0310188	0.0281735	0.0223762	0.0185606	0.0215688	0.0110019
1499	A_55_P2106569	Hist1h4d	NM_175654	21.0251	3.35702	22.0654	21.3053	17.3004	21.9997	37.3276	20.7185	23.6274	23.7576	25.3277	41.378
1500	A_51_P127841	Pdss1	NM_019501	0.411776	0.363914	0.484245	0.453815	0.486349	0.457263	0.424284	0.419519	0.384994	0.374762	0.402624	0.438291
1501	ERCC-00099_60	ERCC-00099_60	ERCC-00099_60	0.00843326	0.00799318	0.00783206	0.00752548	0.0109247	0.0111864	0.00997862	0.00900267	0.00903098	0.015529	0.00942083	0.0109487
1502	A_55_P2152637	Zic4	NM_009576	0.0492095	0.0467255	0.115708	0.0543927	0.185801	0.0476262	0.0593382	0.0615387	0.0482847	0.0149116	0.0470804	0.057074
1503	A_55_P2372897	5730480H06Rik	AK141983	0.490722	0.513449	0.544768	0.381631	0.628892	0.433411	0.434497	0.515844	0.485801	0.414202	0.439186	0.475821
1504	A_66_P136749	Trim43c	NM_001177858	0.0113775	0.00860659	0.00780753	0.00751843	0.0417646	0.0111034	0.00993243	0.00896519	0.00898811	0.00827909	0.00935325	0.0108805
1505	A_55_P2038077	Rpsa	NM_011029	58.2391	58.8783	66.903	54.8678	56.9802	56.9568	60.4149	61.0664	63.3664	64.9157	65.7312	66.79
1506	A_30_P01019417	chr3:145390505-145398253_F	chr3:145390505-145398253_F	0.0833057	0.0747565	0.0832672	0.0665028	0.10537	0.0513365	0.219598	0.0964921	0.040914	0.0583763	0.0592181	0.0496018
1507	A_52_P345539	Uty	NM_009484	0.00835085	0.00792676	0.00776525	0.00749375	0.0108157	0.0110055	0.0437599	0.00891021	0.00892825	0.00823076	0.00927236	0.0166786
1508	A_55_P2058591	Mylpf	XM_006507421	0.0375959	0.0440962	0.0490765	0.0363954	0.0442164	0.38707	0.0280712	0.0374467	0.0475368	0.0365804	0.0470328	0.0483553
1509	A_55_P2006392	A_55_P2006392	A_55_P2006392	102.91	93.6224	100.12	90.1596	99.1593	95.9928	101.464	91.2913	100.478	103.683	97.689	109.63
1510	A_55_P1990755	Ppp3r1	NM_024459	13.8344	15.4382	12.406	16.0517	15.6547	15.7827	15.2965	16.4018	17.4264	16.707	15.7687	17.2215
1511	A_55_P2082880	A_55_P2082880	A_55_P2082880	0.02919	0.00784667	0.0284735	0.00743733	0.0106977	0.0108468	0.133231	0.00881421	0.0257623	0.0174703	0.0187997	0.0161524
1512	A_52_P578768	Slc38a9	NM_178746	3.83515	3.81975	3.28109	4.01918	3.83218	4.41927	4.05123	4.20098	4.1012	4.1793	4.19071	4.51734
1513	A_55_P2021373	Olfr1305	NM_146401	0.00820807	0.00779925	0.00764142	0.00739896	0.0106289	0.0519785	0.407983	0.0357018	0.00875996	0.00809683	0.00907629	0.0106164
1514	A_51_P427476	Mxra8	NM_024263	1.42854	1.30358	1.37012	1.22599	1.36099	1.06035	1.10597	1.1727	1.02222	1.28117	1.14703	1.09122
1515	A_55_P2157330	NAP113464-1	NAP113464-1	78.9571	86.4693	81.9051	73.897	77.7221	77.0394	83.7376	78.3872	84.9971	90.2928	78.6825	84.8962
1516	A_55_P2150781	Mul1	ENSMUST00000105815	0.147667	0.117889	0.129532	0.132954	0.147406	0.23513	0.136147	0.124861	0.118095	0.104739	0.0979062	0.128857
1517	A_55_P2088550	Rpl10l	NM_001162933	0.0080907	0.00769272	0.0075359	0.00731185	0.010478	0.231255	0.00955144	0.0247012	0.0086278	0.00798949	0.00892774	0.0182752
1518	A_51_P279100	Ptgs1	NM_008969	0.229025	0.323179	0.565475	0.243493	0.219195	0.229813	0.227481	0.246346	0.213645	0.247403	0.222101	0.183818
1519	A_51_P109144	Grtp1	NM_025768	0.279672	0.28123	0.28175	0.445372	0.434923	0.352252	0.320729	0.330173	0.322202	0.425495	0.353909	0.390662
1520	A_55_P2153743	Slc26a6	NM_134420	1.11706	1.19469	1.25033	1.24075	1.10036	1.2462	1.15443	1.16774	1.17214	1.18707	1.07202	1.09645
1521	A_52_P281659	Klf13	AK002926	0.0443679	0.0661914	0.0552095	0.0520277	0.0411654	0.179573	0.170087	0.0458399	0.0393036	0.0178486	0.039821	0.0347349
1522	A_55_P2159870	Tead4	NM_011567	0.0079301	0.0134791	0.0152128	0.0177303	0.0782495	0.011567	0.11287	0.00847244	0.00845024	0.00784581	0.00874149	0.0103162
1523	A_55_P1991668	A830010M20Rik	NM_001007574	0.326038	0.315857	0.290381	0.169022	0.313545	0.200125	0.223844	0.223629	0.266094	0.143641	0.124847	0.128831
1524	A_30_P01031172	chr14:21621875-21638625_R	chr14:21621875-21638625_R	0.14288	0.115499	0.123455	0.122741	0.164031	0.190503	0.254258	0.125008	0.134991	0.12342	0.145267	0.109698
1525	A_30_P01025460	chr1:63264155-63345773_R	chr1:63264155-63345773_R	0.0241126	0.0377306	0.0238052	0.0361009	0.0427281	0.178782	0.0118122	0.0138707	0.0243021	0.0303662	0.0127506	0.0325763
1526	A_55_P2134012	Oxa1l	NM_026936	8.701	9.19568	7.91074	8.91234	8.48115	8.32825	8.11086	7.86122	8.15035	9.57948	8.91028	8.19
1527	A_30_P01020122	chr8:50456266-50587338_F	chr8:50456266-50587338_F	0.00776291	0.00739262	0.00724577	0.0138161	0.0119094	0.0101258	0.00917902	0.0083051	0.00826904	0.0161457	0.00856051	0.0101527
1528	A_55_P2148921	Zfp423	NM_033327	0.524023	0.441932	0.45801	0.53526	0.512268	0.546014	0.524671	0.515202	0.502199	0.511834	0.501298	0.494768
1529	A_55_P2130438	6530409C15Rik	AK018330	0.0692285	0.0670826	0.0785964	0.0605646	0.0758523	0.0521993	0.171698	0.0344558	0.0768948	0.0425918	0.0467345	0.0523462
1530	A_55_P2108122	Arcn1	NM_145985	8.86779	9.19845	7.48355	8.59473	8.91557	8.75713	8.5697	8.23213	9.99952	9.09953	8.08646	9.49602
1531	A_55_P1993285	Olfr173	NM_147000	6.30719	6.231	6.53525	7.03162	7.49391	8.17593	6.74652	6.61421	6.77857	7.01431	8.07323	9.29814
1532	A_55_P1991906	Acadvl	NM_017366	25.5803	28.801	23.9459	30.6904	30.4284	29.2007	27.1239	27.1172	29.1187	31.7497	30.623	28.9758
1533	A_65_P07569	Rock1	NM_009071	0.301722	0.325989	0.446309	0.329027	0.352841	0.338855	0.417813	0.310311	0.342128	0.309696	0.396179	0.310598
1534	A_55_P2141988	Gm4847	NM_001164312	0.00753481	0.00718474	0.0148509	0.0225303	0.00977467	0.00982942	0.00892861	0.0100816	0.00802724	0.0075032	0.00833091	0.00994551
1535	A_55_P2162229	LOC432842	XR_395777	0.825194	0.88131	0.688136	0.810814	0.910562	0.846751	0.901987	0.885501	0.861129	0.768528	0.830476	0.832457
1536	A_30_P01029691	chr14:76237150-76237464_R	chr14:76237150-76237464_R	0.0280357	0.01947	0.0159413	0.018219	0.0395525	0.0368179	0.0288378	0.0132606	0.043736	0.0249137	0.0168399	0.0300775
1537	(+)E1A_r60_a97	E1A_r60_a97	E1A_r60_a97	14.3813	13.4208	13.256	12.0853	11.9813	12.4746	13.3138	15.0341	14.6521	13.7692	14.695	19.0071
1538	A_30_P01022237	chr17:35080914-35090009_R	chr17:35080914-35090009_R	1.05122	1.09237	1.05289	0.873503	0.788162	0.945169	0.986093	0.865462	0.890748	1.1204	0.701618	0.797874
1539	A_51_P416919	Ube2j2	NM_021402	2.17474	2.07678	2.19129	1.97589	1.94836	2.22538	1.94645	2.18346	2.14995	2.30921	2.00893	2.26206
1540	A_30_P01031135	chr13:81773237-81783062_R	chr13:81773237-81783062_R	0.0290397	0.0156428	0.0300935	0.040037	0.0432389	0.125873	0.0252215	0.0195216	0.0261171	0.0116415	0.019329	0.0101141
1541	A_30_P01027362	chr11:95627874-95640824_R	chr11:95627874-95640824_R	0.0109494	0.03205	0.0324811	0.0176188	0.140097	0.00957615	0.275375	0.035658	0.00781543	0.00733452	0.00814112	0.0375314
1542	A_55_P2279927	5930430L01Rik	NR_102383	0.117054	0.0924869	0.1195	0.0959977	0.309125	0.238747	0.317574	0.0652025	0.0789144	0.0997782	0.11439	0.0857563
1543	A_55_P2134042	Eif1-ps	XM_006543697	101.728	98.7892	103.204	98.2447	106.437	97.9162	105.725	102.308	106.815	112.396	118.54	111.213
1544	A_30_P01023517	chr17:15226181-15250333_R	chr17:15226181-15250333_R	0.0865004	0.0889095	0.0883592	0.0799415	0.120958	0.0977902	0.102944	0.103642	0.0650418	0.0486815	0.0583136	0.0621512
1545	A_66_P128055	AI846148	NM_001033139	1.30259	1.40824	1.25754	1.60931	1.40978	1.45547	1.41949	1.55819	1.43555	1.46612	1.40193	1.45561
1546	A_30_P01021859	chr2:155269145-155303251_F	chr2:155269145-155303251_F	0.00720184	0.00688761	0.00677406	0.00659534	0.00937134	0.00942854	0.0113383	0.00776961	0.00768971	0.00723603	0.00803967	0.00968015
1547	A_30_P01024126	chr11:55315017-55322092_R	chr11:55315017-55322092_R	0.00717906	0.00686785	0.00675625	0.0065767	0.00934357	0.00940276	0.00856692	0.00774924	0.00766752	0.00721894	0.00802351	0.0096639
1548	A_55_P2177463	B130024G19Rik	NR_045850	1.10385	1.15275	1.23311	1.19014	1.06998	0.865988	1.11729	0.917933	1.03182	1.1448	1.1746	0.65743
1549	A_51_P397920	D17Wsu92e	NM_001033279	6.38968	6.36451	5.88972	6.54621	6.18014	6.72827	6.33174	6.8259	6.64033	6.73608	6.78313	7.09721
1550	A_55_P2132162	Gm14486	XM_006498500	0.0746185	0.090478	0.111226	0.103883	0.0729809	0.107465	0.0876916	0.0971794	0.0934214	0.113821	0.127713	0.110477
1551	A_51_P519592	Srsf10	NM_010178	0.209881	0.227311	0.224043	0.203468	0.227064	0.273994	0.24622	0.241913	0.233242	0.264121	0.256026	0.230608
1552	A_55_P2183257	A_55_P2183257	A_55_P2183257	0.0308506	0.0319838	0.0486611	0.0543936	0.053034	0.0333002	0.153026	0.0552837	0.0314999	0.0300729	0.00795646	0.0244779
1553	A_55_P1968508	A_55_P1968508	A_55_P1968508	0.0234752	0.018271	0.039275	0.0296377	0.0356831	0.0239675	0.106422	0.0353921	0.0254694	0.00713555	0.0326226	0.0420008
1554	A_30_P01029070	chr18:35204950-35216650_F	chr18:35204950-35216650_F	0.00704312	0.00675301	0.00665855	0.00647004	0.00918923	0.00925875	0.00844711	0.00763606	0.00754067	0.00712484	0.00793828	0.00958376
1555	A_51_P107176	Slc25a54	NM_029054	0.00702868	0.00674033	0.00664849	0.00645826	0.0774034	0.00924349	0.0158376	0.0076239	0.00752731	0.00711509	0.00793105	0.00957657
1556	A_55_P2182557	Rfpl3s	NM_183111	0.00701385	0.00672864	0.00854114	0.00644737	0.0185181	0.00922955	0.00842393	0.00761309	0.00751465	0.00710617	0.00792507	0.0095705
1557	A_55_P1953369	Luc7l2	ENSMUST00000159936	0.607118	0.558645	0.601046	0.564155	0.640371	0.566147	0.63003	0.58539	0.49475	0.590622	0.543576	0.614598
1558	A_30_P01026958	chr10:18036490-18059965_F	chr10:18036490-18059965_F	0.0128264	0.0144231	0.0332085	0.0175226	0.0320105	0.12674	0.0176985	0.0237993	0.0140221	0.00757576	0.00791706	0.00956106
1559	A_51_P113026	Cryba1	NM_009965	0.0727616	0.0500196	0.0631625	0.0498079	0.0575808	0.185061	0.0768949	0.0896953	0.0757227	0.0651979	0.0557766	0.0769807
1560	A_30_P01021841	chr7:68849401-68958266_R	chr7:68849401-68958266_R	0.0774535	0.0620767	0.0913263	0.0881823	0.15318	0.0769955	0.0931246	0.071349	0.0969252	0.0670406	0.0975749	0.0751939
1561	A_30_P01023215	chr11:58659807-58676282_R	chr11:58659807-58676282_R	0.0533809	0.0641	0.0707839	0.0648998	0.10731	0.06474	0.0824317	0.0857559	0.0563593	0.0573956	0.0438642	0.0358781
1562	A_55_P2057311	Sox5it	AK016013	0.006947	0.00667815	0.00660577	0.00640046	0.04302	0.00917485	0.00838438	0.00757081	0.00746179	0.00707323	0.0079149	0.00955763
1563	A_55_P2045921	A_55_P2045921	A_55_P2045921	0.00693717	0.00667301	0.00842563	0.00639563	0.0139918	0.0122335	0.00838214	0.00756763	0.00745572	0.00707158	0.00791842	0.00955958
1564	A_52_P130912	Pcdh7	NM_001122758	0.280944	0.222208	0.212944	0.244958	0.267415	0.289178	0.224034	0.291703	0.204332	0.250507	0.305072	0.292399
1565	A_30_P01026667	chr4:128727332-128735227_R	chr4:128727332-128735227_R	5.90917	5.26963	4.81642	5.15612	5.72457	5.59404	5.70905	5.23994	5.51312	5.35595	5.21328	6.15273
1566	A_30_P01030841	chr15:85303728-85304253_F	chr15:85303728-85304253_F	0.00692235	0.00666341	0.00660328	0.00638702	0.0270832	0.00916535	0.0083833	0.00756467	0.00744812	0.00707089	0.00793276	0.00957146
1567	A_55_P1996963	Mtcl1	NM_001114098	12.8484	12.8955	9.95734	14.8434	14.56	13.1229	15.178	14.0208	14.5104	15.6905	14.8988	15.517
1568	ERCC-00099_60	ERCC-00099_60	ERCC-00099_60	0.00691563	0.00666183	0.00909559	0.00679347	0.272587	0.00916874	0.00839026	0.00756812	0.00744783	0.00707487	0.0128456	0.00958483
1569	A_55_P1980062	A_55_P1980062	A_55_P1980062	1.14251	0.999256	0.967496	1.202	1.15852	1.12391	1.12051	1.13312	1.06171	1.18603	1.30714	1.21113
1570	A_55_P2176748	Prss50	NM_146227	0.041608	0.0424655	0.0533439	0.048141	0.071496	0.0593108	0.0523921	0.0613091	0.033358	0.0432462	0.0345734	0.0410611
1571	A_51_P113205	F13b	NM_031164	0.00691337	0.00666604	0.013597	0.00639049	0.0245861	0.0420577	0.00840985	0.00758115	0.00745499	0.0070872	0.00798168	0.00961256
1572	A_30_P01030105	chr16:64765397-64765884_F	chr16:64765397-64765884_F	0.0213222	0.00832076	0.0191017	0.0186923	0.0265827	0.054195	0.0187249	0.0261572	0.00745967	0.0165777	0.0147384	0.055056
1573	A_30_P01029972	chr10:62812866-62831016_F	chr10:62812866-62831016_F	0.022724	0.00757303	0.0161015	0.0173703	0.0249603	0.0361443	0.0476502	0.00759506	0.007465	0.00737922	0.00800878	0.00963608
1574	A_30_P01025433	chr5:92563184-92566678_R	chr5:92563184-92566678_R	0.0718302	0.0480737	0.0768705	0.0634265	0.101054	0.0963203	0.120303	0.0673911	0.0693649	0.0439186	0.0835006	0.0846001
1575	A_52_P582318	ENSMUST00000145050	ENSMUST00000145050	0.0193398	0.0184154	0.0241738	0.0205398	0.018037	0.0323477	0.207436	0.0197544	0.0191268	0.0346732	0.015802	0.0238399
1576	ERCC-00004_125	ERCC-00004_125	ERCC-00004_125	0.0069283	0.0066909	0.00666454	0.00641546	0.00911862	0.00923133	0.00846651	0.0188519	0.00748645	0.00712434	0.00805791	0.00967879
1577	A_55_P2050226	Ackr4	AY072938	0.00803512	0.0200755	0.0069935	0.018171	0.00912972	0.0209593	0.00848112	0.00763456	0.0186637	0.0071339	0.00807603	0.00969478
1578	ETG09_205211	ETG09_205211	ETG09_205211	0.0069406	0.00670639	0.0066877	0.00643103	0.00914197	0.00925896	0.00849696	0.007647	0.00750641	0.00714473	0.008095	0.00971157
1579	A_55_P2049835	Nxph1	NM_008751	0.029717	0.0091179	0.053274	0.0205786	0.0365507	0.027917	0.0472665	0.0341903	0.0359219	0.0201327	0.0266452	0.0144866
1580	A_55_P2090996	Ebna1bp2	NM_026932	10.468	11.0934	10.0809	11.8854	12.021	10.6021	11.9853	11.3457	11.6296	11.7053	11.0255	11.8035
1581	A_30_P01032866	chr5:109156118-109156422_F	chr5:109156118-109156422_F	0.014673	0.00673571	0.0137385	0.00646028	0.00918574	0.00930779	0.0122562	0.0101963	0.00754102	0.00718031	0.0152128	0.0202655
1582	A_66_P110769	Cabyr	NM_027687	0.122557	0.16776	0.184691	0.116534	0.124188	0.173295	0.153043	0.15213	0.130942	0.15581	0.139916	0.120889
1583	A_30_P01025572	chr6:57583950-57624216_F	chr6:57583950-57624216_F	0.240819	0.418667	0.237755	0.172614	0.198166	0.176854	0.1872	0.174692	0.152054	0.235758	0.188224	0.152866
1584	A_55_P1965728	Abca17	NM_001031621	0.146316	0.0993567	0.113219	0.11613	0.129173	0.129337	0.111184	0.148847	0.135219	0.110716	0.102584	0.108549
1585	A_66_P111689	Gm9372	XM_001003736	1.23645	1.21548	1.15611	1.17722	1.35656	1.21083	1.47405	1.17136	1.24301	1.38161	1.14187	1.18546
1586	A_55_P2054897	Rnd1	NM_172612	0.0784961	0.0803731	0.115087	0.0311365	0.0288732	0.0342571	0.134257	0.0666266	0.0534599	0.0340511	0.0282347	0.0134279
1587	A_55_P2074141	Tmprss11d	NM_145561	0.00703672	0.00681174	0.00682806	0.00653722	0.00929841	0.00943085	0.0181415	0.00779458	0.00763081	0.00726484	0.0083023	0.00990008
1588	A_55_P1989871	Purg	NM_152821	0.736108	0.682414	0.605808	0.623457	0.602263	0.676922	0.58801	0.642593	0.623688	0.558947	0.674012	0.737497
1589	A_51_P459012	Zswim2	NM_027964	0.00706629	0.017984	0.0106063	0.00967577	0.00934245	0.00947829	0.00873483	0.007952	0.00766654	0.0287401	0.0195314	0.00994893
1590	A_55_P2013586	Prss8	NM_133351	0.00708107	0.00685843	0.0104019	0.00658376	0.00936341	0.00950197	0.00876125	0.0165354	0.00768366	0.00731427	0.00838257	0.00997332
1591	A_66_P114782	Nr2f1	NM_010151	5.97363	6.32882	6.70405	5.04054	5.45192	4.6542	4.67647	5.54196	5.42651	6.04551	5.92255	5.49718
1592	A_30_P01024883	chr11:102878974-102888924_R	chr11:102878974-102888924_R	0.370621	0.39086	0.382129	0.351694	0.378556	0.349956	0.339182	0.41071	0.265679	0.278478	0.286448	0.281621
1593	A_55_P2112997	Ddx18	NM_025860	2.33856	2.34777	2.33807	2.49863	2.53098	2.41028	2.32206	2.1684	2.45127	2.46489	2.39434	2.49967
1594	A_30_P01019190	chr11:95483973-95490751_F	chr11:95483973-95490751_F	0.0229047	0.0209492	0.03523	0.0142196	0.0222327	0.0886957	0.0287539	0.0444696	0.0207928	0.0285037	0.0199077	0.0273455
1595	A_55_P1996573	Ttc13	NM_145607	15.3681	17.118	14.4369	18.1679	16.8283	16.7772	17.0403	16.856	17.472	18.0208	17.18	16.4964
1596	A_30_P01022068	chr10:126818382-126856582_R	chr10:126818382-126856582_R	0.0273961	0.052993	0.0725771	0.0709244	0.0880777	0.0696542	0.057746	0.0393538	0.0548685	0.0433517	0.0502851	0.0517198
1597	A_30_P01019896	chr19:57426515-57435165_F	chr19:57426515-57435165_F	0.0453874	0.039314	0.0428789	0.046529	0.0243043	0.0632754	0.0347026	0.0416863	0.0351686	0.044592	0.0280647	0.0344975
1598	A_55_P2117169	Zmym1	NM_026670	2.25464	2.53511	2.24514	2.95682	2.67448	2.74489	2.59822	2.32092	2.70033	2.62472	2.67414	3.0032
1599	A_30_P01027060	chr15:74484699-74485279_F	chr15:74484699-74485279_F	0.00724295	0.00700741	0.00707437	0.00673868	0.0095935	0.00974069	0.00902114	0.00806225	0.00888698	0.0074599	0.00863206	0.0102138
1600	A_30_P01031921	chr10:83181374-83249918_R	chr10:83181374-83249918_R	0.0213447	0.0245843	0.0386471	0.0189371	0.0363229	0.0281832	0.00904963	0.0136855	0.0329599	0.0254293	0.012641	0.0107929
1601	A_30_P01019138	chr14:76912477-76931702_R	chr14:76912477-76931702_R	0.00728198	0.00704109	0.00711682	0.00677436	0.00964631	0.00979516	0.11721	0.00810944	0.00789075	0.00748982	0.00868548	0.010267
1602	A_51_P511315	Pstpip1	NM_011193	0.297672	0.449394	0.314898	0.56681	0.517709	0.444111	0.305514	0.274955	0.348789	0.435736	0.564405	0.480357
1603	A_51_P255257	Olfr513	NM_146723	0.0868856	0.0790253	0.0644927	0.0830174	0.0899528	0.0824303	0.109214	0.0931592	0.0758742	0.0723487	0.0447503	0.0593306
1604	A_55_P2297485	Ago2	ENSMUST00000044113	4.09412	4.21731	3.85072	4.15432	3.97177	4.44879	3.8818	4.70723	4.0893	3.95718	3.86154	3.74535
1605	A_55_P2188237	C530008M17Rik	ENSMUST00000125922	0.0331717	0.055861	0.0524452	0.0358824	0.0688213	0.053657	0.0174487	0.028208	0.0401025	0.0350987	0.038631	0.0259569
1606	A_52_P355014	Rbm8a	NM_025875	4.14804	4.2818	3.90115	4.2247	4.07942	4.0518	4.02806	4.30486	4.40594	4.05546	4.18243	4.54114
1607	A_55_P2127664	A_55_P2127664	A_55_P2127664	0.124457	0.0993204	0.0991317	0.100257	0.107067	0.173964	0.0860384	0.0959987	0.10277	0.106058	0.112963	0.073131
1608	A_55_P1991054	Tmf1	NM_001081111	1.90294	1.94973	1.82945	2.26548	1.89698	1.99494	2.08133	1.97534	2.12651	1.95053	2.0993	2.18828
1609	A_55_P2005552	Arhgef10l	NM_001290803	19.4595	19.4424	17.1316	23.2557	21.966	20.402	21.5173	20.0424	22.6245	21.7687	24.7932	23.0234
1610	A_66_P119735	BC049265	AK158865	0.725157	0.668993	0.68938	0.59492	0.739476	0.708389	0.808524	0.753263	0.397356	0.327534	0.418244	0.520414
1611	A_30_P01027284	chr14:33923944-34003394_F	chr14:33923944-34003394_F	0.0826939	0.0904073	0.0717149	0.0970737	0.228762	0.085535	0.227969	0.0874211	0.0627976	0.0580735	0.0483192	0.0661921
1612	A_51_P223709	Pask	NM_080850	0.472796	0.616104	0.536325	0.543174	0.528456	0.510938	0.524341	0.472114	0.527959	0.572702	0.562767	0.465337
1613	A_55_P2168899	A_55_P2168899	A_55_P2168899	0.324036	0.259235	0.294029	0.262075	0.24004	0.282987	0.315836	0.285458	0.254887	0.218819	0.291507	0.269177
1614	A_30_P01024860	chr6:82585089-82585332_R	chr6:82585089-82585332_R	0.0871081	0.113354	0.0910902	0.104646	0.11528	0.0899885	0.149167	0.118618	0.117802	0.104545	0.129672	0.112703
1615	A_52_P519653	Abca5	NM_147219	1.19528	1.34525	0.90698	1.26049	1.29019	1.22764	0.629607	1.27088	1.38994	1.1531	1.27641	1.63224
1616	A_55_P2117490	9530057J20Rik	XM_006508967	0.449713	0.48049	0.61304	0.381483	0.691037	0.503541	0.532576	0.476329	0.507654	0.442652	0.549042	0.467577
1617	A_55_P2036615	Lrif1	NM_001039488	0.816129	0.935622	0.986798	1.05733	0.887383	1.05558	1.07274	0.934592	1.06029	0.901975	0.876703	0.96048
1618	A_55_P2180176	Ms4a6b	NM_027209	0.0152311	0.0368025	0.0360586	0.0333012	0.0137471	0.0219342	0.00950666	0.00841791	0.0351249	0.0249999	0.0177716	0.0106176
1619	A_30_P01028854	chr11:79552346-79553082_R	chr11:79552346-79553082_R	0.0431956	0.0462146	0.0239896	0.0433916	0.0159587	0.0540722	0.163123	0.0195843	0.0249763	0.0128076	0.0160071	0.0106267
1620	A_51_P116326	P2rx3	NM_145526	1.20481	1.04905	0.82342	1.47246	1.31341	1.65288	1.32684	1.42563	1.3906	1.98433	1.94561	2.43929
1621	A_51_P288978	ENSMUST00000074808	ENSMUST00000074808	0.0727741	0.0688021	0.079268	0.0596285	0.0472115	0.0879844	0.118466	0.0702153	0.0464059	0.0656978	0.0480803	0.0444629
1622	A_55_P2094771	Olfr32	NM_010980	0.0108733	0.0072229	0.0101518	0.00701318	0.0100039	0.212162	0.00955003	0.00843598	0.0103951	0.0075509	0.0089349	0.0130899
1623	A_52_P466659	Speer9-ps1	NR_001583	0.0304946	0.0186293	0.0261133	0.0324498	0.0312061	0.0308845	0.0164012	0.0293655	0.0188341	0.0210704	0.0089218	0.0106415
1624	A_51_P396854	Timm10b	NM_019502	13.1518	13.8181	12.867	11.7853	11.5471	13.7693	14.2042	12.4495	11.7549	11.6171	12.849	11.5118
1625	A_51_P112237	Angel1	NM_144524	6.02908	5.94206	4.18591	6.85438	6.3165	7.02402	6.22173	5.93777	6.2401	7.2606	6.66747	7.76614
1626	A_55_P2021709	Oxnad1	NM_145460	1.65707	1.79908	1.82349	1.83578	1.78893	1.8231	1.7535	1.80759	1.77786	1.8799	1.84718	1.70545
1627	A_55_P2121426	LOC101055744	XM_003945355	11.5497	11.6347	11.8295	10.8866	10.9744	11.0503	11.2578	10.4151	11.8249	11.9458	10.6564	11.1797
1628	A_52_P282762	Myd88	NM_010851	0.95419	1.11578	1.03929	1.01286	0.843231	0.825673	0.877995	1.01808	1.0407	0.761077	0.805612	0.903068
1629	A_55_P2063871	A_55_P2063871	A_55_P2063871	5.93057	5.80191	5.48548	7.02154	6.1626	6.12874	6.18902	5.90439	6.15239	6.30372	6.45905	6.19073
1630	A_30_P01029438	chr5:110182844-110228345_R	chr5:110182844-110228345_R	0.0679393	0.202302	0.102553	0.142894	0.0845382	0.206781	0.0655208	0.100322	0.132932	0.112645	0.0848886	0.168095
1631	A_55_P2004511	Cd300lf	NM_001169153	8.31736	8.27922	11.6337	6.76204	8.21128	9.25146	10.5768	10.0791	11.5549	6.70226	9.43896	14.0614
1632	A_30_P01026072	chr17:36131460-36136694_F	chr17:36131460-36136694_F	0.00757228	0.0114778	0.00721204	0.0110032	0.00984581	0.0133956	0.0969675	0.00831073	0.00834335	0.00725511	0.0086427	0.0140897
1633	A_55_P2091149	BC051142	ENSMUST00000131998	0.00755673	0.00701439	0.00718075	0.00686772	0.00980959	0.00993391	0.00944153	0.00828121	0.00777884	0.0072084	0.00859167	0.0105046
1634	A_55_P2104363	Cysltr1	NM_021476	0.0304249	0.0427862	0.059703	0.0314503	0.00977137	0.0278829	0.0218822	0.0247617	0.0275923	0.0149375	0.00853671	0.0104736
1635	A_55_P2049687	Efna2	NM_007909	0.223044	0.22285	0.231283	0.228883	0.200731	0.177806	0.214844	0.240991	0.219384	0.130141	0.180715	0.164873
1636	ERCC-00160_243	ERCC-00160_243	ERCC-00160_243	0.0074942	0.0068986	0.00706236	0.006774	0.0096808	0.00979701	0.00933939	0.00817409	0.0090226	0.0070479	0.00841378	0.0104007
1637	A_66_P118752	Rabif	NM_145510	1.62207	1.42452	1.37541	1.56904	1.5273	1.54474	1.51007	1.37596	1.62878	1.51706	1.47213	1.51714
1638	A_55_P2005145	Zfp455	NM_001048204	0.173803	0.194567	0.184385	0.208127	0.174026	0.171324	0.207174	0.170142	0.202204	0.175675	0.173571	0.185413
1639	A_55_P2209178	C230029M16	NR_110482	0.00740485	0.0168488	0.0423858	0.0161232	0.00951225	0.00962228	0.00920009	0.00803392	0.0095387	0.00685821	0.00819521	0.0102637
1640	A_30_P01026203	KCNQ1ot1	KCNQ1ot1	0.616529	0.593558	0.605041	0.57495	0.611717	0.623131	0.644407	0.606966	0.597677	0.558265	0.592941	0.683364
1641	A_55_P2046877	Foxq1	NM_008239	0.0776269	0.083114	0.0723597	0.050658	0.0744299	0.038332	0.0356895	0.0684077	0.0678997	0.0974668	0.042927	0.0525532
1642	A_51_P466824	Tyk2	NM_018793	0.467142	0.387685	0.446909	0.447791	0.518364	0.456041	0.44312	0.39847	0.478532	0.520961	0.488242	0.504349
1643	A_55_P2142393	Cacna1a	NM_007578	1.89449	1.88201	1.79424	2.03248	2.05672	2.15865	1.99482	2.45569	2.18992	2.04688	2.3209	2.12876
1644	A_55_P1958976	Scarf1	NM_001004157	0.007876	0.00738356	0.00723579	0.0102361	0.0102061	0.0108868	0.0140109	0.00845484	0.00847774	0.0107288	0.0201195	0.0108568
1645	A_55_P2046661	Tnfrsf14	NM_178931	0.833126	0.620906	0.680328	0.635855	0.828937	0.694149	0.719853	0.842331	0.346426	0.343775	0.348193	0.422942
1646	A_55_P2322555	5930433N17Rik	AK031230	0.299961	0.252007	0.371443	0.252236	0.241993	0.268058	0.196012	0.320727	0.312086	0.195113	0.257681	0.302451
1647	A_55_P2134452	A_55_P2134452	A_55_P2134452	0.192662	0.106569	0.169711	0.159319	0.157089	0.26768	0.182776	0.183785	0.15705	0.106986	0.149632	0.188974
1648	A_55_P2084812	Sec31a	NM_026969	1.66984	1.57419	1.42807	1.65801	1.56108	1.68157	1.46428	1.46116	1.59787	1.79216	1.56142	1.70461
1649	A_55_P2027230	A_55_P2027230	A_55_P2027230	0.0771252	0.0805336	0.0756842	0.0733893	0.0718473	0.0836126	0.0650078	0.0819483	0.0913039	0.0842409	0.055066	0.06919
1650	A_30_P01023648	chr5:121669792-121732542_R	chr5:121669792-121732542_R	0.0326757	0.00819683	0.0341678	0.0268782	0.034152	0.0248437	0.0110246	0.028252	0.0275042	0.0175704	0.0165034	0.0190051
1651	A_30_P01030772	chr17:38132217-38157667_R	chr17:38132217-38157667_R	0.0962005	0.0413732	0.0833521	0.0570186	0.070629	0.075352	0.0765651	0.107867	0.0849278	0.0383741	0.0342793	0.0564176
1652	A_55_P2200034	Dleu2	AK162803	0.00940421	0.00780993	0.0139964	0.00726809	0.0273507	0.0112377	0.00986918	0.0088706	0.0119863	0.00819523	0.00945036	0.0110585
1653	A_30_P01032036	chr15:61984389-62102500_F	chr15:61984389-62102500_F	0.256298	0.237019	0.214446	0.243217	0.257474	0.250471	0.399828	0.27136	0.24498	0.281452	0.268993	0.254745
1654	A_55_P2053127	Foxg1	NM_001160112	0.0578741	0.122227	0.152619	0.0287782	0.102606	0.0700763	0.116777	0.0785505	0.103475	0.0315893	0.0766988	0.0845845
1655	A_55_P1976142	Gm10609	AK144086	0.0083716	0.00867789	0.00774963	0.00737974	0.0108534	0.0112894	0.0547016	0.00895644	0.0107401	0.0172206	0.0094985	0.0308546
1656	A_30_P01018988	chr7:134620707-134626739_R	chr7:134620707-134626739_R	0.00839342	0.00792903	0.0128321	0.0158183	0.0108815	0.0112978	0.00997629	0.00897732	0.0090145	0.00829351	0.00950688	0.0175722
1657	A_55_P2121046	A_55_P2121046	A_55_P2121046	0.00841193	0.00795006	0.0077938	0.00743603	0.0109046	0.03857	0.00999298	0.0177072	0.00903252	0.00830916	0.0185034	0.0110776
1658	A_55_P2078335	Mapk4	NM_172632	0.0703541	0.0631887	0.0717241	0.0768878	0.105007	0.105426	0.0954294	0.0999715	0.0719937	0.0573883	0.0635953	0.0710796
1659	A_51_P245895	Mapk4	NM_172632	0.502222	0.394286	0.419211	0.577132	0.623204	0.491335	0.582832	0.570731	0.57416	0.566435	0.512295	0.641798
1660	A_55_P2226660	5033418A18Rik	AK017178	0.0764946	0.0841632	0.107835	0.0522595	0.0483146	0.0703061	0.0460631	0.0707802	0.0570773	0.0558016	0.0717887	0.0690411
1661	A_52_P564413	Pik3c2g	NM_207683	0.0445652	0.0732416	0.0580102	0.0558363	0.057267	0.0443491	0.0520219	0.0541699	0.0405	0.0329296	0.0366779	0.035211
1662	ERCC-00083_214	ERCC-00083_214	ERCC-00083_214	0.00845659	0.00800665	0.00784901	0.0246071	0.0109584	0.0112696	0.0251791	0.0145573	0.00906775	0.00834416	0.00948854	0.0110326
1663	A_30_P01026012	chrX:34360500-34388500_R	chrX:34360500-34388500_R	0.187621	0.247263	0.214424	0.201243	0.2189	0.300757	0.202498	0.203156	0.367098	0.171855	0.273862	0.25884
1664	A_55_P2056846	Olfr525	NM_146956	0.00845353	0.0111024	0.0248211	0.0130084	0.0220981	0.0112341	0.0126204	0.0178971	0.013366	0.00833902	0.013699	0.0208914
1665	A_30_P01032756	chr3:30099759-30133959_R	chr3:30099759-30133959_R	0.243363	0.256148	0.239098	0.236437	0.254968	0.190898	0.207531	0.262503	0.277941	0.243605	0.24697	0.242811
1666	A_51_P109171	Os9	NM_177614	13.6698	13.7105	13.5578	13.4554	12.8776	12.9037	13.4947	13.1699	13.6562	13.3408	12.8686	13.0716
1667	A_30_P01020232	chr2:175374875-175465550_F	chr2:175374875-175465550_F	0.0136895	0.00799401	0.0207131	0.0219772	0.110455	0.0111611	0.0184617	0.0212277	0.00902658	0.00831274	0.00940319	0.0241685
1668	A_55_P2027436	Bri3	NM_018772	28.1681	31.5096	27.928	31.7121	30.8176	29.0823	29.4155	28.6017	32.3803	30.3487	29.0054	28.8944
1669	A_55_P1972882	Mrpl20	XM_006539104	0.107651	0.0875381	0.0448133	0.10716	0.120888	0.0444355	0.0419787	0.0855391	0.0303018	0.102056	0.113596	0.0869036
1670	A_30_P01028106	chr7:3338500-3360725_R	chr7:3338500-3360725_R	0.276586	0.260867	0.286562	0.267253	0.324656	0.269352	0.398864	0.33022	0.17415	0.182375	0.178928	0.226203
1671	A_52_P578840	Pigb	NM_018889	0.0169046	0.00794546	0.00778552	0.00751281	0.0108442	0.0110327	0.157764	0.00892994	0.00895172	0.0177172	0.00929745	0.0108316
1672	A_55_P1952900	Gm833	NR_033138	0.132903	0.0931534	0.123837	0.151556	0.0983315	0.484434	0.122455	0.119859	0.0982836	0.13259	0.1225	0.11499
1673	A_55_P2143934	ENSMUST00000062642	ENSMUST00000062642	0.828452	0.66867	0.678036	0.655765	0.685324	1.03983	0.787508	0.769767	0.6921	0.66638	0.597682	0.647195
1674	A_55_P2334684	Rsf1	NM_001081267	0.281763	0.254928	0.271689	0.2676	0.283571	0.471678	0.258733	0.303494	0.301369	0.27184	0.309718	0.363918
1675	A_30_P01021119	chr1:77819988-77820546_F	chr1:77819988-77820546_F	0.00828307	0.0078663	0.00770883	0.00745745	0.0107287	0.0108781	0.0148919	0.00883568	0.00970231	0.00817227	0.0166932	0.0254208
1676	A_51_P236197	Polr1a	NM_009088	2.87002	3.13466	2.87279	2.85885	3.08282	3.02444	2.82929	3.00834	2.98424	3.24516	3.19711	3.04313
1677	A_30_P01021847	chr19:55715078-55776694_R	chr19:55715078-55776694_R	0.0100465	0.0078195	0.0158572	0.00742049	0.0106606	0.015244	0.338869	0.0162798	0.00878751	0.00812338	0.00910096	0.0130594
1678	A_51_P324529	Calcoco2	NM_001271018	0.266451	0.230685	0.270111	0.248757	0.494661	0.262076	0.287821	2.32589	0.353847	0.261372	0.280318	0.302495
1679	A_30_P01023812	chr3:126989696-127112471_R	chr3:126989696-127112471_R	0.785183	0.720289	0.708338	0.770007	0.935394	0.869003	0.817578	0.817059	0.962413	0.769272	0.808323	1.02592
1680	A_51_P122723	Grpel1	NM_024478	12.0945	11.6344	10.9165	11.5686	11.2489	11.0197	10.8447	10.1551	12.0464	11.1641	10.4623	11.7251
1681	A_51_P185713	Ptdss2	NM_013782	0.793908	0.80165	0.773541	0.810455	0.834897	1.06328	0.801428	0.771371	0.688895	0.756875	0.610031	0.729232
1682	A_55_P1980311	Pcbp2	NM_001103165	2.16965	2.24153	2.31004	2.09918	1.88353	1.96217	1.95871	1.88172	1.88232	2.20423	1.93867	1.84275
1683	A_55_P2125623	A_55_P2125623	A_55_P2125623	0.567947	0.520942	0.461753	0.510321	0.501364	0.538631	0.539004	0.54708	0.485263	0.495629	0.437711	0.42001
1684	A_30_P01030258	chrX:20389063-20389702_F	chrX:20389063-20389702_F	0.0984521	0.0676919	0.116907	0.0941319	0.0828826	0.118361	0.0800949	0.0815854	0.0684863	0.0427801	0.0247399	0.0636681
1685	A_30_P01033484	chr15:85412264-85549139_F	chr15:85412264-85549139_F	0.00798849	0.0219279	0.044008	0.0519727	0.016147	0.236969	0.259337	0.0498838	0.0378279	0.018893	0.0397217	0.0531105
1686	A_55_P1965248	Olfr354	NM_146939	0.0079548	0.00756658	0.00860627	0.00720966	0.0871343	0.0355632	0.145348	0.00849522	0.00847834	0.0078716	0.00876829	0.0103432
1687	A_55_P1956443	Ttc5	NM_001080949	0.9607	1.04164	0.891395	1.02961	1.03927	1.01439	1.01344	1.12513	1.12156	1.14462	1.15978	1.14483
1688	A_66_P113401	Zfp46	NM_009557	0.0302927	0.0367333	0.0197231	0.0341049	0.145618	0.0519737	0.0211939	0.026917	0.0408469	0.0179781	0.0227412	0.0375347
1689	A_51_P112817	Cyp27a1	NM_024264	0.0508628	0.0406225	0.0686633	0.0529508	0.0375785	0.117422	0.0343987	0.0319225	0.0308757	0.0196301	0.0252702	0.0423332
1690	A_51_P210732	Vmn1r82	NM_134234	0.0210762	0.0323827	0.0403383	0.0332261	0.0202698	0.0858258	0.0284047	0.0212696	0.0215775	0.00849142	0.023292	0.020726
1691	A_51_P126437	Enc1	NM_007930	0.794531	0.705012	0.920126	0.8166	0.712928	0.623126	0.74137	0.805547	0.745321	0.726424	0.686889	0.686044
1692	A_55_P1968778	Rasa1	NM_145452	2.40691	2.32209	2.06928	2.83054	2.48406	2.41267	2.27606	2.164	2.44525	2.2969	2.45327	2.46959
1693	A_55_P1974957	Tnr	NM_022312	0.151005	0.126647	0.151911	0.132816	0.159699	0.161734	0.217342	0.196634	0.189552	0.154526	0.123051	0.210734
1694	A_55_P2153762	A630081J09Rik	XM_006544010	0.257606	0.326633	0.422038	0.414176	0.438742	0.430377	0.387899	0.436318	0.407586	0.410167	0.432082	0.332421
1695	A_30_P01018027	chr14:115423660-115463160_R	chr14:115423660-115463160_R	0.0606797	0.0616116	0.0562708	0.0616324	0.0457998	0.0535397	0.055049	0.0484817	0.0511629	0.0581591	0.0790047	0.0546846
1696	A_55_P2252426	4921517O11Rik	AK014914	0.00762181	0.0111586	0.00712368	0.021334	0.0113358	0.00993656	0.00902165	0.00816188	0.00811929	0.00758035	0.00841581	0.0100234
1697	A_55_P2106666	Adcy9	NM_009624	8.5445	8.59653	7.85086	8.10476	8.37308	8.79745	7.65425	8.40457	8.40555	9.27666	8.8371	9.27369
1698	A_52_P531175	Fkbp3	NM_013902	24.3908	25.081	18.9892	25.5172	28.4532	23.6878	23.5051	19.9083	25.6699	30.0375	26.0831	28.0914
1699	A_51_P412866	Olfr862	NM_146562	0.00752617	0.00717484	0.00704118	0.00686113	0.00976417	0.00981437	0.00891866	0.00806871	0.0080195	0.00749874	0.00832256	0.00993875
1700	A_55_P2137576	Nphp3	NM_028721	0.14151	0.177157	0.150602	0.182266	0.172173	0.161873	0.161821	0.160375	0.117781	0.179935	0.174191	0.12368
1701	A_52_P32864	Prps2	NM_026662	0.384046	0.403212	0.369626	0.414546	0.442944	0.412815	0.369022	0.349319	0.351433	0.496759	0.339777	0.405216
1702	A_30_P01020820	chr7:140016236-140016772_R	chr7:140016236-140016772_R	0.0600395	0.0791973	0.121462	0.0707431	0.060132	0.0757822	0.086245	0.0733026	0.0387375	0.0444464	0.07423	0.0794502
1703	A_55_P2185407	Gm5258	XM_357111	0.0439089	0.0376095	0.0405107	0.052428	0.0586164	0.120387	0.0551322	0.0575498	0.0229126	0.0159138	0.0271896	0.0474002
1704	A_55_P2186205	Trappc2	NM_025432	0.939038	0.967847	0.739225	1.0847	1.10428	1.12841	1.03204	0.898794	1.14105	1.10199	1.02712	1.0556
1705	A_30_P01031637	chr1:183951156-183986156_F	chr1:183951156-183986156_F	0.00734937	0.00701531	0.00689256	0.00671535	0.152917	0.00959664	0.00873291	0.00790017	0.00808667	0.00735345	0.0081607	0.00979118
1706	ERCC-00112_152	ERCC-00112_152	ERCC-00112_152	0.00732197	0.00699114	0.00687029	0.00767425	0.158234	0.0164931	0.172424	0.00787487	0.00781024	0.00733179	0.00813751	0.0097696
1707	A_55_P2121735	LOC102637011	XM_006541368	0.0616538	0.0595483	0.0461737	0.0669386	0.0557992	0.149273	0.1147	0.0598651	0.0541069	0.0755314	0.0420658	0.0622761
1708	A_30_P01024792	chr1:138528250-138538250_R	chr1:138528250-138538250_R	0.00726996	0.00694457	0.00682819	0.00665051	0.00945117	0.087613	0.00865247	0.00782675	0.00775794	0.0072906	0.0080941	0.00972954
1709	A_66_P105635	Olfr859	NM_146526	0.0159399	0.00692246	0.0103766	0.0206129	0.0126591	0.00947368	0.00862799	0.00780425	0.00773313	0.00727091	0.00807425	0.0106015
1710	A_30_P01032351	chr11:120041124-120052299_R	chr11:120041124-120052299_R	0.250609	0.201757	0.200971	0.209981	0.203795	0.257597	0.241147	0.223144	0.187673	0.207679	0.154068	0.17456
1711	A_55_P2098995	Cfhr2	NM_001025575	2.09624	1.9526	1.89181	1.73544	1.76402	1.73471	1.88485	1.63235	1.54082	1.45168	1.42887	1.52236
1712	A_55_P2183378	Snx11	NM_028965	15.2499	15.8163	13.2614	17.9301	17.4408	17.2032	16.3982	17.2501	18.0045	19.1301	18.2378	19.7437
1713	A_55_P2107775	Apol9a	NM_173786	0.0463741	0.0457507	0.023897	0.033759	0.067506	0.0148239	0.0364444	0.0256966	0.00764414	0.031164	0.0264608	0.0376386
1714	A_30_P01027575	chr8:108153471-108159346_R	chr8:108153471-108159346_R	0.0144311	0.0171027	0.0749809	0.0268472	0.0393767	0.023571	0.00852151	0.045483	0.0282693	0.0202479	0.0296029	0.0277324
1715	A_51_P105068	Lypd6b	NM_027990	0.851021	0.797431	0.590743	0.945655	1.28271	0.896356	0.704319	1.15973	0.916624	1.48163	1.17177	1.30485
1716	A_30_P01023945	chrX:12758189-12760546_F	chrX:12758189-12760546_F	8.49246	9.52876	8.48131	9.73365	10.0707	10.2354	9.09225	9.72188	9.84437	9.34565	9.95992	9.66281
1717	A_66_P113556	Wnt16	NM_053116	0.100712	0.0962083	0.109629	0.10155	0.0905999	0.110849	0.246976	0.113057	0.0994133	0.0758098	0.114291	0.083482
1718	A_55_P2126072	A_55_P2126072	A_55_P2126072	0.00705977	0.00676274	0.00666979	0.00648212	0.0112247	0.0092708	0.0327116	0.00936999	0.00755412	0.00713889	0.0079486	0.00959277
1719	A_51_P162098	Ndufaf4	NM_026742	3.38964	2.84446	3.13989	3.6611	3.39609	3.47092	3.50294	3.12564	3.53539	3.08764	3.69992	3.75393
1720	A_55_P2146185	Rs1	NM_011302	77.1926	80.0184	87.0225	64.796	77.7982	83.7698	86.9796	90.6214	96.2536	68.3554	83.6951	111.484
1721	A_30_P01026394	chr17:13185488-13187031_R	chr17:13185488-13187031_R	0.017478	0.0113749	0.0175225	0.016319	0.0650318	0.0133402	0.00881333	0.0251457	0.0171489	0.00719513	0.0126514	0.0224366
1722	A_30_P01033011	chr9:96673952-96674816_F	chr9:96673952-96674816_F	0.0519855	0.0442457	0.0941337	0.0252376	0.0653001	0.163984	0.0313588	0.0322173	0.0303788	0.0281244	0.0199907	0.0727364
1723	A_52_P656628	Crx	NM_007770	0.00698936	0.00670702	0.00662647	0.00642901	0.00913148	0.0810694	0.00840582	0.00759328	0.00749616	0.00709591	0.00792187	0.0095644
1724	A_30_P01020536	chr7:4827340-4863315_R	chr7:4827340-4863315_R	0.0588232	0.0839069	0.0868729	0.112708	0.0737682	0.145565	0.100912	0.099144	0.0588527	0.0571052	0.0701958	0.0557984
1725	A_51_P246224	Tram2	NM_177409	0.494456	0.411159	0.564041	0.36532	0.467145	0.397672	0.401059	0.414393	0.383554	0.3715	0.386724	0.383874
1726	A_30_P01026915	chr12:110967974-110969051_F	chr12:110967974-110969051_F	0.0358441	0.0465189	0.0755027	0.0600404	0.102054	0.0689552	0.0488336	0.0746217	0.0720966	0.0310123	0.0468809	0.0705468
1727	A_30_P01031372	chr3:87757295-87774970_R	chr3:87757295-87774970_R	0.00695129	0.00667941	0.0122591	0.0218016	0.0239027	0.00917708	0.0101109	0.00933994	0.00746861	0.0103092	0.00792283	0.00956228
1728	A_55_P2033272	Treh	NM_001277847	0.00694375	0.00667494	0.00732112	0.00639912	0.00909005	0.00917303	0.00838531	0.00756935	0.00746235	0.00707774	0.00792631	0.00956445
1729	ERCC-00048_92	ERCC-00048_92	ERCC-00048_92	0.00693785	0.00667109	0.00660799	0.00639582	0.00908575	0.00917087	0.00838506	0.00756785	0.00746041	0.00707808	0.00793075	0.00956837
1730	A_55_P2123616	Gm5127	NM_001033541	0.0258366	0.0212532	0.0107939	0.0262932	0.0345399	0.0216514	0.00838602	0.00756738	0.0159374	0.0222748	0.0127219	0.00957282
1731	A_51_P108659	Pon1	NM_011134	0.0272163	0.00666676	0.0227462	0.0329131	0.0670306	0.00917011	0.00838825	0.0415471	0.0130501	0.0163307	0.00794327	0.0144309
1732	A_66_P123155	Ddo	NM_027442	0.0538795	0.0330504	0.123648	0.0496129	0.168594	0.0634792	0.0285529	0.0248135	0.0323017	0.0308777	0.0376039	0.00958517
1733	A_30_P01032625	chr4:40720362-40729687_F	chr4:40720362-40729687_F	0.111702	0.152105	0.156892	0.157	0.29479	0.146579	0.141168	0.149764	0.0896192	0.120323	0.113387	0.134596
1734	A_55_P1963134	Gm6135	XR_376099	0.0152829	0.0175037	0.0112693	0.00639291	0.00908397	0.0629744	0.0212906	0.0194449	0.0218377	0.0141513	0.00797163	0.00960182
1735	A_30_P01029328	chr6:100514596-100520846_R	chr6:100514596-100520846_R	0.00935469	0.0260437	0.0201306	0.00639497	0.0422787	0.0224228	0.00840981	0.00758165	0.0279776	0.00709303	0.00798314	0.00961154
1736	A_55_P2408864	Mtx3	AK090249	0.0201992	0.0190182	0.0209661	0.0161909	0.0654641	0.0698994	0.0299963	0.027962	0.0162134	0.0278164	0.00799532	0.00962206
1737	A_65_P16680	B4galt5	NM_019835	11.3545	12.7186	10.6266	12.5071	12.429	11.726	12.5004	12.8661	13.7423	12.565	11.8524	12.6176
1738	ERCC-00142_99	ERCC-00142_99	ERCC-00142_99	0.0277446	0.00668053	0.0212058	0.027857	0.0265202	0.00920874	0.0861227	0.0163653	0.0101702	0.0209063	0.00802497	0.0191424
1739	ERCC-00054_84	ERCC-00054_84	ERCC-00054_84	0.00693069	0.00668624	0.0066559	0.00641208	0.00911389	0.00921919	0.151955	0.00761186	0.00748545	0.00711995	0.00804064	0.0139703
1740	A_30_P01027957	chr6:67052066-67119366_R	chr6:67052066-67119366_R	0.0857046	0.0570613	0.0460583	0.0522934	0.0750851	0.061184	0.290484	0.0613906	0.0461055	0.0757329	0.0478414	0.0549046
1741	A_55_P2066274	A_55_P2066274	A_55_P2066274	9.28315	8.85623	10.3083	9.28052	10.8411	11.2328	9.67731	9.48251	9.35783	10.6944	10.1354	9.31658
1742	A_30_P01026422	chr1:162965309-162970704_F	chr1:162965309-162970704_F	0.0950873	0.0771876	0.0756219	0.0901785	0.140248	0.125342	0.152352	0.02568	0.0706737	0.131568	0.135579	0.0812209
1743	A_30_P01028940	chr2:104640443-104659168_F	chr2:104640443-104659168_F	0.006954	0.00671584	0.0114817	0.00745353	0.00915877	0.0124798	0.00850794	0.0149475	0.00752472	0.00715974	0.00811381	0.00972629
1744	A_30_P01022794	chr17:79042382-79052046_R	chr17:79042382-79052046_R	0.00699717	0.0067257	0.00671381	0.00990644	0.00917337	0.0113535	0.0085272	0.0129037	0.00753454	0.00725083	0.00813443	0.00974399
1745	A_30_P01020379	chr7:88131123-88136898_F	chr7:88131123-88136898_F	0.070574	0.085645	0.0977371	0.08557	0.0967541	0.076218	0.0920774	0.112645	0.0419954	0.0520209	0.0599994	0.0549636
1746	A_30_P01017656	chr7:137486825-137498500_F	chr7:137486825-137498500_F	0.0069811	0.00674612	0.00674257	0.00647297	0.00920412	0.00932432	0.00856606	0.00770142	0.00756001	0.00719715	0.00817828	0.00978378
1747	A_55_P2015177	A_55_P2015177	A_55_P2015177	7.79114	8.04455	6.59891	8.1603	8.08514	8.55072	8.2505	7.07181	8.25928	9.29688	7.56628	8.99589
1748	A_55_P2020366	AK036053	AK036053	0.120031	0.0942239	0.114946	0.0986519	0.138434	0.122676	0.132917	0.154308	0.0964682	0.0697307	0.0928841	0.10582
1749	A_30_P01023036	chr14:61240427-61325677_R	chr14:61240427-61325677_R	0.00701484	0.00678368	0.00679088	0.00650958	0.00925911	0.00938326	0.165322	0.0148822	0.00760351	0.00723814	0.00824945	0.00984785
1750	A_55_P2004901	A_55_P2004901	A_55_P2004901	0.00702802	0.00679706	0.0068086	0.006523	0.00927901	0.0094047	0.123494	0.00777099	0.00761907	0.0072527	0.00827429	0.00987051
1751	A_51_P225506	Pnrc2	NM_026383	4.80521	4.89674	5.44048	4.865	4.61077	4.92588	4.43473	4.65208	5.02567	4.19371	4.63111	4.53126
1752	A_55_P1973844	Sema5b	NM_013661	0.283987	0.289216	0.227707	0.32083	0.309377	0.314006	0.24347	0.271322	0.314509	0.281831	0.240023	0.262727
1753	A_55_P2350553	4933405D12Rik	AK016661	0.51642	0.44053	0.556718	0.472748	0.479366	0.492005	0.460015	0.535464	0.524325	0.399844	0.461883	0.514804
1754	A_51_P432403	Fgfr2	NM_010207	0.0259272	0.0182049	0.055123	0.0306683	0.0198047	0.0173838	0.0228446	0.0207832	0.014097	0.00983869	0.0165917	0.0174209
1755	A_30_P01025430	chr18:38478632-38482159_F	chr18:38478632-38482159_F	0.0244466	0.0277866	0.0252816	0.0319163	0.022649	0.034923	0.0210907	0.0339733	0.0352908	0.0278961	0.0316534	0.0246078
1756	A_55_P2062811	Tomm5	NM_001134646	13.0824	13.1943	11.2803	14.577	15.4573	14.2487	14.2979	14.3336	12.1699	15.9173	14.082	12.4573
1757	A_30_P01026837	chr19:23068397-23190256_F	chr19:23068397-23190256_F	0.0297952	0.0225332	0.00694519	0.0284286	0.00943848	0.0341442	0.0231787	0.00791769	0.014264	0.0630097	0.056071	0.0319481
1758	A_55_P1978576	Dtx2	NM_001256096	5.86303	5.68214	5.68491	5.89158	5.76102	6.35646	5.75581	5.49836	5.85074	5.4753	5.48179	6.65677
1759	A_30_P01025165	chr11:79529699-79530564_F	chr11:79529699-79530564_F	0.0967725	0.0621678	0.071154	0.0815276	0.0783251	0.122684	0.0528297	0.0939824	0.0535703	0.0579031	0.0364063	0.0631886
1760	A_55_P2173626	Samd3	NM_001115154	0.00799445	0.0069564	0.00700892	0.00721693	0.00951518	0.00965556	0.00892347	0.00798709	0.0169064	0.00741676	0.0085479	0.0101265
1761	A_51_P104125	Fam76b	NM_176836	1.15689	1.2849	1.35116	1.16945	1.15204	1.07786	1.08591	1.26093	1.09903	1.15727	1.24171	0.997168
1762	A_52_P27244	Mapk9	NM_207692	1.54179	1.38516	1.42409	1.44614	1.38523	1.54619	1.36308	1.3755	1.35793	1.38741	1.58254	1.60907
1763	A_30_P01023396	chr15:73455424-73477275_R	chr15:73455424-73477275_R	0.0595371	0.043402	0.0520055	0.0457209	0.0483604	0.0561229	0.0264653	0.055678	0.0660762	0.0370673	0.0312321	0.0376724
1764	A_52_P148212	Mis18bp1	NM_172578	0.0224975	0.01839	0.0106647	0.0230165	0.0111805	0.0174465	0.00904455	0.0125861	0.0292825	0.0327677	0.0270508	0.0230464
1765	A_30_P01024168	chr13:56286339-56298089_R	chr13:56286339-56298089_R	0.0161997	0.0168359	0.0231831	0.0067754	0.00964825	0.00979274	0.17191	0.0290201	0.00789881	0.0116508	0.00868891	0.0102632
1766	A_55_P1970287	Gm9125	NM_001163730	0.0257179	0.0371408	0.0317363	0.0265806	0.010804	0.0313928	0.0987808	0.0207859	0.0202831	0.027735	0.0183002	0.0264299
1767	A_55_P2079064	Ppnr	S76755	1.57898	1.41706	1.60873	1.34168	1.40579	1.55415	1.18869	1.57289	1.40006	1.00295	1.29795	1.50269
1768	A_55_P2182134	Mctp1	NM_030174	0.205698	0.168071	0.123613	0.159324	0.13297	0.150166	0.157682	0.144856	0.147485	0.168118	0.218867	0.162277
1769	ERCC-00057_123	ERCC-00057_123	ERCC-00057_123	0.0073656	0.00710909	0.00719926	0.0068462	0.0231556	0.00989942	0.00919494	0.0081999	0.00797007	0.00755265	0.00878803	0.0103683
1770	A_30_P01018846	chr9:114416254-114416844_R	chr9:114416254-114416844_R	0.0151252	0.0122989	0.0269765	0.00923604	0.0608171	0.0203312	0.00922414	0.0199196	0.00798656	0.0238894	0.0154409	0.0137607
1771	A_55_P1971347	Mta3	NM_001171054	0.341958	0.32003	0.28945	0.407654	0.363493	0.49904	0.376699	0.3371	0.36987	0.42737	0.39786	0.469722
1772	A_66_P129893	1700047M11Rik	NR_015458	0.655996	0.641026	1.08065	0.598702	0.763186	0.787019	0.747478	0.757545	0.546006	0.601539	0.86841	0.539422
1773	A_51_P131442	Dpf1	NM_013874	0.301402	0.296101	0.352746	0.268895	0.314445	0.355482	0.330631	0.30198	0.295566	0.316173	0.357186	0.328393
1774	A_30_P01021282	chr6:131263850-131314850_R	chr6:131263850-131314850_R	0.0140214	0.00718044	0.00729121	0.0177615	0.00987085	0.0100192	0.00933585	0.0181949	0.0178758	0.00773273	0.00889289	0.0184652
1775	A_55_P1987245	Ywhaz	NM_011740	4.38181	4.47545	4.4128	4.42315	4.59266	4.85153	4.70996	4.79787	4.54813	4.33509	5.04953	5.16678
1776	A_51_P383194	Pde9a	NM_008804	0.125157	0.13575	0.298729	0.166296	0.282526	0.137563	0.118425	0.161015	0.118161	0.127965	0.130703	0.123684
1777	A_55_P2011097	Gsdma2	NM_029727	0.0354877	0.0161816	0.0187312	0.0212945	0.0670598	0.0237213	0.0210308	0.0225037	0.00807666	0.00762168	0.0111546	0.0193939
1778	A_55_P2085776	Ifi27l2b	NM_145449	0.0607566	0.0729625	0.0845095	0.0520321	0.0926552	0.0498144	0.116165	0.0578864	0.0416199	0.0391721	0.0406231	0.0705077
1779	A_51_P234714	Ceacam14	NM_025957	0.0075457	0.00723014	0.00735903	0.00699027	0.00996437	0.0101109	0.0141435	0.00839162	0.00908725	0.00762538	0.00895888	0.0105854
1780	A_30_P01023952	chr5:32392912-32395033_F	chr5:32392912-32395033_F	0.00756017	0.00723648	0.0073693	0.00900843	0.00997869	0.0197983	0.0130625	0.00840507	0.00809556	0.00762445	0.0089685	0.0106005
1781	A_51_P190961	Gzmf	NM_010374	0.00757389	0.00724141	0.00737752	0.00700783	0.00999143	0.0297137	0.00949399	0.00841707	0.00809786	0.00762184	0.00897369	0.010614
1782	A_66_P139295	Tomm40	NM_001109748	11.6289	12.1459	10.6889	13.3954	12.8434	13.257	12.4778	12.2864	13.1102	13.3364	13.4128	14.2411
1783	A_55_P2083609	Dkk3	NM_015814	17.3914	21.5301	14.8147	23.8064	23.5084	26.3076	23.8334	19.1417	25.8108	24.9147	24.2178	20.389
1784	A_55_P2023480	A_55_P2023480	A_55_P2023480	0.0906681	0.076719	0.094309	0.105041	0.0759194	0.237002	0.216832	0.0822379	0.0832526	0.0808181	0.0831101	0.11504
1785	A_30_P01030528	chr6:28161665-28189840_F	chr6:28161665-28189840_F	0.0956713	0.0547785	0.0908306	0.0749663	0.0806531	0.0823198	0.0620989	0.083658	0.0501897	0.0476575	0.0435917	0.0754821
1786	A_55_P1956652	Sfmbt2	NM_001198809	0.185041	0.171053	0.176322	0.14168	0.160915	0.257312	0.235264	0.162203	0.157685	0.189011	0.198334	0.206057
1787	A_52_P392216	Dab1	NM_177259	0.130298	0.108786	0.181164	0.119278	0.109439	0.141286	0.127047	0.107112	0.116658	0.111566	0.0942281	0.103262
1788	A_30_P01019839	chr8:59966759-59989065_R	chr8:59966759-59989065_R	0.0285598	0.00905906	0.0103591	0.0119531	0.0195082	0.0253255	0.00956857	0.0184171	0.0123483	0.0285221	0.0176759	0.0106587
1789	A_52_P584188	Frat1	NM_008043	0.750361	0.743448	0.734964	0.605607	0.620815	0.803046	0.823083	0.635862	0.667339	0.779727	0.816919	0.782301
1790	A_30_P01032108	chr14:55433382-55452757_F	chr14:55433382-55452757_F	0.239156	0.203116	0.215322	0.19977	0.19329	0.163683	0.222379	0.245562	0.169025	0.241946	0.229126	0.252493
1791	A_55_P1973339	Mapk1	NM_001038663	3.02213	5.00948	3.03994	4.75045	3.88019	3.60116	4.46966	3.8003	3.59539	4.43923	2.85015	3.52869
1792	A_30_P01018268	chr13:98571741-98603323_F	chr13:98571741-98603323_F	0.0426096	0.0367824	0.0387147	0.0397092	0.0495079	0.026399	0.059057	0.0407938	0.0310303	0.0268103	0.00889536	0.0338261
1793	A_66_P129747	Dnajc24	NM_026992	1.19165	1.19225	1.26298	1.29761	1.30029	1.24564	1.40348	1.22339	1.28895	1.37279	1.46963	1.43338
1794	A_65_P20699	Tlk2	NM_001112705	0.819502	0.859415	0.849233	0.797357	0.819577	0.958617	0.851434	0.962824	0.893875	0.827431	0.955634	0.823995
1795	A_55_P2127015	Olfr720	NM_146392	0.0101081	0.015719	0.00727087	0.0116202	0.0161631	0.0478003	0.248747	0.012908	0.0222317	0.00734035	0.00873533	0.025397
1796	A_55_P2106901	Nkain4	NM_021426	1.69153	1.68713	2.59766	1.85611	1.5919	1.59814	1.92099	1.90477	1.68838	1.68936	1.67743	1.73993
1797	A_30_P01022462	chr4:123155515-123361565_F	chr4:123155515-123361565_F	0.00758753	0.00704886	0.00721293	0.00689791	0.00985297	0.00997456	0.00947109	0.00831422	0.00782424	0.00725387	0.00864307	0.0105387
1798	A_55_P2090345	BC085271	BC085271	4.82289	4.30335	4.82062	4.49593	4.56526	4.74649	4.98591	4.79074	4.80083	4.41872	5.02033	4.9588
1799	A_51_P388801	Tbcc	NM_178385	15.4895	15.2583	12.1802	18.3683	15.9508	17.5766	16.6511	15.5574	17.0988	17.1864	17.6006	19.222
1800	A_30_P01022571	chr8:26343277-26352902_R	chr8:26343277-26352902_R	0.204649	0.167968	0.206391	0.142147	0.155961	0.184025	0.106989	0.175785	0.163639	0.122114	0.172181	0.183001
1801	A_55_P2039537	1700003M07Rik	NR_040647	0.0194289	0.00772677	0.562986	0.0145522	0.00967541	0.00979371	0.00933625	0.00817224	0.00892301	0.00704159	0.00840325	0.0104013
1802	A_51_P191463	H2-M2	XM_006525458	3.3845	4.67837	2.1667	1.53235	2.50532	2.28207	1.75431	1.59948	1.42753	2.64742	1.39945	3.30236
1803	A_30_P01020876	chr1:15837503-15838648_F	chr1:15837503-15838648_F	0.0634056	0.0417218	0.0824981	0.0365114	0.0336228	0.0312137	0.04585	0.0275181	0.0552545	0.044929	0.0364841	0.0716064
1804	A_66_P108815	Pgls	NM_025396	2.07937	2.29915	1.84492	2.07925	2.14169	2.07076	2.18357	2.0127	2.27181	2.08664	2.20406	2.32985
1805	A_30_P01030830	chr6:47959825-47960502_R	chr6:47959825-47960502_R	0.0077102	0.00721599	0.00709254	0.00663603	0.00999656	0.0107332	0.00926247	0.00829195	0.00830346	0.00767491	0.00899729	0.0107765
1806	A_55_P1973006	Bag1	NM_001171739	31.4163	31.5184	26.7608	29.7416	28.5667	29.9055	29.2574	29.6693	31.9605	33.5336	33.578	32.8788
1807	A_55_P2063033	Phc2	ENSMUST00000133439	0.00785886	0.00736727	0.00955366	0.00679294	0.0101911	0.0108784	0.00942359	0.00844136	0.0124026	0.00781378	0.00912687	0.0108678
1808	A_55_P2097264	Pth2	NM_053256	0.0290383	0.0243553	0.0349709	0.023115	0.0268539	0.0240779	0.029103	0.0329006	0.0501195	0.0377821	0.0273732	0.0159533
1809	A_51_P392385	Smcp	NM_008574	0.00798774	0.00750127	0.00735361	0.0125386	0.010363	0.0110057	0.00956533	0.00857709	0.00860117	0.00793557	0.00923783	0.010944
1810	A_55_P1991778	Fam219a	NM_001159583	39.3986	32.5823	32.9193	34.1998	33.8966	37.6315	33.3425	37.874	36.4417	32.4809	36.0067	34.2961
1811	A_30_P01029393	chrX:11671167-11700242_F	chrX:11671167-11700242_F	0.00810219	0.00762019	0.0113187	0.00706083	0.0105093	0.0291754	0.00968854	0.00869179	0.00872062	0.00804016	0.00932937	0.0110046
1812	A_51_P353095	Zfyve27	NM_177319	12.2714	13.7612	11.8295	13.6758	12.8415	14.1792	14.1078	13.6	15.0307	14.2024	14.1964	14.3469
1813	A_51_P345663	Rrbp1	NM_024281	5.43403	5.31568	5.34615	5.37471	5.44774	5.04502	4.61883	4.59462	5.36792	5.67535	5.23854	4.64841
1814	A_55_P1966863	Mad2l2	NM_027985	4.7751	4.15288	4.67733	4.43569	4.34236	4.5468	4.27227	4.55921	4.89766	4.50787	4.37236	4.13176
1815	A_55_P2142928	Cadm2	NM_178721	0.363636	0.368336	0.509492	0.366052	0.463474	0.385017	0.332173	0.429499	0.450065	0.43994	0.522491	0.482834
1816	A_55_P2102901	Fbxl4	NM_172988	0.917778	0.869386	0.850375	0.94324	0.942176	0.967109	1.02308	0.844459	0.896125	0.986506	1.07364	0.924775
1817	A_55_P2016486	Tmem131	NM_018872	2.99602	3.00409	2.54296	3.33657	3.38874	3.07276	2.73194	2.85843	3.2706	3.56901	3.11742	3.07155
1818	A_52_P314129	Pkia	NM_008862	2.49515	2.51506	2.06295	2.12924	2.89467	2.21126	2.26555	2.24173	3.17417	2.80695	2.35667	2.45952
1819	ERCC-00130_136	ERCC-00130_136	ERCC-00130_136	0.00839578	0.00793195	0.00777876	0.0112699	0.010889	0.0113126	0.0290502	0.00898136	0.0274469	0.0135302	0.00952054	0.0155788
1820	A_30_P01019321	chr6:93570531-93599006_F	chr6:93570531-93599006_F	0.00841594	0.00795424	0.00780143	0.00744207	0.0109155	0.0113203	0.0100064	0.00900097	0.00904189	0.00832773	0.00952681	0.0111036
1821	A_30_P01032496	chr4:59306575-59317850_R	chr4:59306575-59317850_R	0.493896	0.374288	0.405813	0.425355	0.496072	0.442172	0.436625	0.529164	0.251501	0.229088	0.232814	0.254251
1822	A_51_P395293	Ccz1	NM_177682	5.98254	6.79844	5.38099	6.49652	5.83876	5.71425	5.71057	5.61831	6.19394	6.78379	6.3626	6.01492
1823	A_52_P513345	Zswim5	NM_001029912	0.330902	0.318362	0.211877	0.251485	0.320131	0.359971	0.243203	0.289661	0.367068	0.348667	0.361501	0.357529
1824	A_30_P01024221	chr2:172343878-172344212_R	chr2:172343878-172344212_R	0.00846339	0.00801061	0.0111746	0.00752239	0.0109731	0.0113045	0.0100426	0.0090415	0.0146022	0.00836149	0.00952003	0.0110733
1825	A_30_P01033285	chr18:61783548-61783935_F	chr18:61783548-61783935_F	0.028931	0.0314325	0.0495973	0.0235936	0.0127119	0.0232857	0.0190557	0.0196052	0.0199671	0.0155062	0.00950994	0.0244127
1826	A_30_P01027762	chr8:48476637-48492537_R	chr8:48476637-48492537_R	0.0084684	0.00835043	0.00786484	0.00754375	0.0109786	0.0112769	0.0100399	0.0173014	0.0151031	0.00836252	0.0124509	0.0282435
1827	A_30_P01030563	chr6:30127175-30128051_F	chr6:30127175-30128051_F	0.0954461	0.100771	0.0723415	0.088935	0.111256	0.0551136	0.0716987	0.0913281	0.113545	0.0871187	0.0754519	0.072494
1828	A_52_P407796	Mdh1	NM_008618	78.2878	79.8447	64.72	89.9127	78.9393	82.3276	72.6357	69.5899	81.7374	85.6584	81.5118	84.7058
1829	ERCC-00165_60	ERCC-00165_60	ERCC-00165_60	0.0100272	0.00801548	0.0174982	0.0196875	0.018437	0.0112144	0.0100132	0.0251844	0.0115777	0.00834807	0.00944904	0.0223787
1830	A_52_P240693	Aqp12	NM_177587	0.0155291	0.0197929	0.00785239	0.00755629	0.103428	0.0111884	0.00999927	0.0211198	0.0314613	0.0083383	0.00942729	0.0263983
1831	A_66_P130030	LOC102642739	XM_006543206	0.287505	0.24296	0.342762	0.257077	0.308895	0.250212	0.228831	0.325369	0.362069	0.189475	0.310656	0.238713
1832	A_55_P2107468	Rab5b	NM_177411	0.685468	0.597829	0.643278	0.618451	0.646562	0.651676	0.578921	0.620118	0.537409	0.601739	0.668828	0.604198
1833	A_52_P160397	2410137M14Rik	NM_029747	0.0173942	0.0189084	0.0381677	0.0112507	0.0139328	0.0168295	0.163117	0.0205027	0.0175865	0.011233	0.0125779	0.0108903
1834	A_55_P2057979	1700003M02Rik	NM_027041	0.210404	0.532597	0.301291	0.5385	0.41283	0.7381	0.702982	0.209412	0.836561	0.454522	0.394658	0.459936
1835	A_55_P1961888	Twistnb	NM_172253	1.87662	1.60948	1.68809	1.84999	1.76797	1.88361	2.08906	1.82315	2.22636	1.63803	2.10338	2.19342
1836	A_30_P01024192	chr6:131263850-131314850_F	chr6:131263850-131314850_F	1.2361	1.05349	1.03639	1.0778	1.12486	1.31439	1.08119	1.09717	1.02802	1.07793	0.959608	1.01344
1837	A_51_P105408	Alg14	NM_024178	3.41056	3.01949	3.28456	3.71503	3.51609	3.49144	3.76576	3.76006	3.70015	3.47881	3.99864	3.90611
1838	A_55_P2031736	Npas3	NM_013780	0.237086	0.194455	0.415023	0.242029	0.16325	0.191296	0.201493	0.208568	0.165324	0.152862	0.178523	0.142611
1839	A_51_P286748	Frzb	NM_011356	1.46202	1.50316	0.998959	1.32319	1.82059	1.21789	1.816	1.162	1.79695	1.42094	1.51055	1.59181
1840	A_51_P414837	Faf1	NM_007983	2.69265	2.53296	2.25696	2.78227	2.66149	2.65623	2.6154	2.43308	2.66026	2.76096	2.49134	2.56839
1841	A_51_P163444	Carhsp1	NM_025821	13.6029	14.1887	12.6753	11.2031	12.2084	11.5462	12.9176	13.4179	14.9006	11.461	9.78855	11.8449
1842	A_30_P01031393	chr1:134171292-134176062_R	chr1:134171292-134176062_R	0.00819793	0.00778851	0.00763512	0.00740131	0.106223	0.0107369	0.00967984	0.0087434	0.00875149	0.00809846	0.00940099	0.0135278
1843	A_55_P1957098	Mtfr1l	NM_001256112	17.8594	19.0127	15.466	21.2951	19.2734	19.7897	19.2669	19.1725	20.202	21.0718	20.4986	20.2011
1844	A_55_P2187043	Tpm1	NM_001164248	2.77662	2.6464	2.85418	2.55789	2.52008	2.39811	2.66341	2.94513	3.16281	2.87245	3.3756	3.13527
1845	A_55_P2035454	Oaz1	NM_008753	91.7236	98.8583	87.9255	102.975	97.9419	94.9582	95.4533	97.5124	97.9716	103.606	104.881	103.902
1846	A_55_P1964920	TC1614033	TC1614033	0.00807911	0.00767715	0.00756177	0.0073084	0.0104619	0.0105539	0.00953527	0.0447671	0.00861419	0.00798905	0.00890896	0.0104742
1847	A_55_P2067752	Psg26	NM_001029893	0.00804421	0.0076477	0.00749761	0.00728342	0.0104209	0.0105071	0.00949782	0.0191006	0.0123291	0.00933657	0.0088706	0.0130857
1848	A_55_P1969356	Ccm2l	NM_145536	0.163533	0.16863	0.147507	0.15202	0.175812	0.238825	0.201119	0.108551	0.158592	0.20615	0.101071	0.107073
1849	A_51_P113722	Fbxl14	NM_133940	2.14454	2.26351	2.14281	2.50119	2.42592	2.4626	2.21529	2.51975	2.51627	2.34539	2.752	2.68173
1850	ERCC-00022_66	ERCC-00022_66	ERCC-00022_66	0.0239222	0.0197424	0.0204247	0.0193115	0.0952159	0.0103673	0.106449	0.0219275	0.0166076	0.0104231	0.0087581	0.0103366
1851	A_55_P2348241	4933417O13Rik	NR_045842	0.00791204	0.0109638	0.00738002	0.0071783	0.107784	0.010321	0.00934541	0.0112054	0.00843321	0.00783782	0.00901383	0.0103029
1852	A_51_P431785	Myom2	NM_008664	0.0979086	0.185627	0.219687	0.122965	0.124613	0.195426	0.0858841	0.223648	0.16995	0.106146	0.125341	0.169221
1853	A_30_P01019908	chr3:35782698-35789932_F	chr3:35782698-35789932_F	0.0078451	0.00746451	0.00732023	0.00712408	0.0101667	0.172759	0.00926889	0.00838186	0.00835963	0.00777792	0.00864602	0.0102358
1854	A_30_P01031360	chr3:146515333-146557069_F	chr3:146515333-146557069_F	9.93268	8.33582	7.6513	11.8656	11.0106	12.2443	11.7219	10.3529	11.3588	10.0527	12.9511	14.1447
1855	A_55_P2087275	Vmn2r3	NM_001104614	0.0077777	0.00740222	0.00726073	0.01117	0.0100803	0.0101375	0.0091934	0.00831328	0.00828671	0.00771865	0.00857579	0.0101707
1856	A_51_P118763	Ahctf1	NM_026375	0.550196	0.595626	0.616438	0.492952	0.555669	0.548094	0.549676	0.545839	0.586842	0.562065	0.602669	0.493527
1857	A_55_P2214003	4932439E07Rik	AK077051	0.164444	0.141548	0.165368	0.166492	0.181345	0.16187	0.127717	0.20808	0.196335	0.134472	0.155542	0.189977
1858	A_55_P1958185	Hoxd11	NM_008273	0.019454	0.0919342	0.0373208	0.117082	0.0601328	0.0602661	0.0419749	0.107756	0.0526123	0.0501881	0.0453902	0.0644923
1859	A_51_P146505	Atp11b	NM_029570	1.46042	1.43056	1.29739	1.47704	1.42759	1.39544	1.52877	1.5058	1.30692	1.6566	1.62059	1.38456
1860	A_55_P2068011	Lzts1	ENSMUST00000181890	0.0717189	0.0565007	0.0502637	0.108718	0.0605559	0.0758524	0.115694	0.0640098	0.0697306	0.0967263	0.0777551	0.12499
1861	A_30_P01027974	chr14:22267795-22319045_F	chr14:22267795-22319045_F	15.2141	15.3155	9.91517	17.1814	17.6524	16.5118	16.025	14.6925	19.5868	19.4931	15.14	18.6667
1862	A_55_P1957700	Ttll11	NM_029774	1.28307	1.27054	1.11986	1.39369	1.38663	1.39689	1.31639	1.24512	1.36987	1.37513	1.37156	1.40976
1863	A_55_P2067146	A_55_P2067146	A_55_P2067146	0.178086	0.10377	0.191959	0.161253	0.123835	0.291391	0.120677	0.160284	0.0988155	0.0977524	0.181647	0.185247
1864	A_55_P2079787	Prss50	NM_146227	0.0907954	0.103536	0.113109	0.0809652	0.109889	0.0846128	0.0849593	0.120313	0.0673589	0.0738215	0.0688832	0.0659428
1865	A_55_P1967514	Dnah7a	NM_001252070	0.0385922	0.0718594	0.0746012	0.0606685	0.0570298	0.0471479	0.0320593	0.0451481	0.0284783	0.0648151	0.0707876	0.0568258
1866	A_52_P161806	Ovca2	NM_027136	1.94078	1.60784	1.54036	1.72148	1.56284	1.82347	1.64856	1.82285	1.67608	1.80787	1.59355	1.83052
1867	A_55_P2174945	LOC102641639	XR_400206	0.0267145	0.0196796	0.0341374	0.0280636	0.0213939	0.141038	0.0284439	0.0129399	0.0179231	0.00982479	0.0459382	0.0445246
1868	A_30_P01028071	chr17:56691095-56693810_R	chr17:56691095-56693810_R	0.0536885	0.0523849	0.0610646	0.0590913	0.0811508	0.232502	0.0403774	0.0358378	0.0511106	0.0440498	0.0702075	0.0727493
1869	A_55_P1960765	NAP111375-1	NAP111375-1	8.70328	8.95879	8.85891	8.07015	8.6541	8.33117	8.52428	7.72918	9.19132	9.54577	7.74845	8.40427
1870	A_51_P249537	Wdr24	NM_173741	1.45888	1.39736	1.33094	1.51981	1.55521	1.54848	1.56006	1.40189	1.51044	1.49373	1.63846	1.56305
1871	A_51_P122425	Ctf1	NM_007795	0.258602	0.270198	0.257476	0.340889	0.234367	0.398103	0.260311	0.28098	0.243306	0.2618	0.267538	0.201587
1872	ETG10_195139	ETG10_195139	ETG10_195139	0.00726469	0.00693696	0.00682341	0.00664566	0.00944381	0.00949139	0.00864462	0.0078191	0.00775462	0.00728875	0.00883149	0.0097261
1873	A_51_P292877	Snrnp200	NM_177214	2.47599	2.3882	2.02473	2.50533	2.28668	2.1433	2.10153	2.16989	2.26541	2.58951	2.40038	2.58942
1874	A_30_P01031875	chr7:77323753-77482708_R	chr7:77323753-77482708_R	0.0273124	0.0152697	0.0528605	0.0246614	0.0210637	0.0247319	0.0396257	0.0253518	0.0176129	0.00987519	0.0233007	0.0169206
1875	A_51_P126525	D230025D16Rik	NM_145604	1.33219	1.5044	1.23371	1.39636	1.39396	1.33783	1.32306	1.30481	1.4427	1.61403	1.48151	1.49045
1876	A_51_P317286	ENSMUST00000100190	ENSMUST00000100190	0.0209572	0.0190282	0.0228808	0.0301943	0.028027	0.00962916	0.00855448	0.0488271	0.0349081	0.018683	0.0350602	0.0447648
1877	A_55_P2088054	Syn3	NM_013722	0.508501	0.423443	0.357396	0.505115	0.503823	0.424299	0.391352	0.42721	0.431913	0.479487	0.462209	0.494033
1878	A_51_P268798	Vmn1r202	NM_134224	0.00712979	0.00681991	0.0929729	0.00653662	0.00928574	0.00934039	0.00851649	0.00769895	0.00762325	0.00718834	0.00799183	0.00963251
1879	A_30_P01033534	chr10:126818382-126856582_R	chr10:126818382-126856582_R	0.00711047	0.00680358	0.00670578	0.00652131	0.00926384	0.00931992	0.00849918	0.00768285	0.00760505	0.00717482	0.00797973	0.00962072
1880	A_30_P01031557	chr9:113233366-113261487_R	chr9:113233366-113261487_R	0.230648	0.257376	0.236232	0.248508	0.252344	0.256767	0.46556	0.232456	0.232295	0.214989	0.188209	0.185616
1881	A_55_P2127194	NAP022003-001	NAP022003-001	0.0186374	0.0154076	0.0104058	0.0235156	0.0252194	0.00928276	0.102096	0.022638	0.00757232	0.0107925	0.00795893	0.00960062
1882	A_30_P01029810	chr9:81537835-81583227_R	chr9:81537835-81583227_R	0.00705856	0.00675972	0.0066694	0.00648061	0.00920553	0.0337232	0.0084547	0.0090548	0.00755752	0.0071397	0.00795057	0.00959221
1883	A_52_P85765	Stard6	NM_029019	0.092339	0.10606	0.0986357	0.0861411	0.221285	0.162127	0.101277	0.117029	0.106305	0.115226	0.078214	0.11855
1884	A_51_P267933	Snhg11	NM_175692	21.0269	26.1567	24.892	25.7794	20.8983	27.3403	31.2905	27.1036	29.2336	28.0098	30.6622	19.1702
1885	A_66_P105771	Gm10548	NR_040534	0.0247033	0.0166514	0.0356697	0.0155919	0.0651176	0.0287614	0.00868093	0.0310611	0.0217405	0.0231496	0.0266275	0.0688767
1886	A_51_P326043	Hydin	NM_172916	0.444986	0.331267	0.372867	0.377214	0.418856	0.579277	0.417267	0.398091	0.354723	0.330336	0.295911	0.37836
1887	A_51_P123705	Dus3l	NM_144858	2.60772	2.43211	2.41751	2.79994	2.67789	2.80163	2.59493	2.44318	2.66405	3.14135	2.81227	2.48982
1888	A_55_P2271416	Dcdc2c	XM_006515179	0.0181295	0.0255117	0.0315806	0.00642299	0.0480005	0.00919547	0.00921689	0.0075855	0.0128341	0.00709601	0.00792634	0.00956554
1889	ERCC-00148_99	ERCC-00148_99	ERCC-00148_99	0.538488	0.463425	0.47303	0.504784	0.669219	0.485143	0.572411	0.609012	0.280806	0.242448	0.241828	0.363896
1890	A_51_P170827	Asb5	NM_029569	0.0131733	0.040998	0.0319048	0.0269972	0.113744	0.0329631	0.0120521	0.0245147	0.0239427	0.0253156	0.0226347	0.0164456
1891	ERCC-00083_214	ERCC-00083_214	ERCC-00083_214	0.0112573	0.00684437	0.00661457	0.0229951	0.017764	0.00917864	0.0242903	0.0250427	0.0074746	0.0217992	0.011481	0.00956767
1892	A_55_P1987569	A_55_P1987569	A_55_P1987569	0.0069482	0.00667613	0.00865198	0.00640252	0.00909577	0.00917592	0.00838859	0.00757074	0.00746953	0.00708608	0.00793579	0.00957049
1893	A_30_P01027704	chr12:110003268-110030953_F	chr12:110003268-110030953_F	0.0343032	0.0327508	0.0514365	0.0446032	0.0452503	0.0237552	0.055922	0.0412134	0.0330083	0.0281306	0.0104445	0.00957447
1894	A_51_P227275	Csn3	ENSMUST00000001667	4.01158	3.57512	3.88453	3.78849	4.67637	5.06444	3.98575	3.71527	3.84331	4.10779	4.73482	5.12137
1895	A_66_P113868	Cdh3	NM_001037809	0.0710709	0.257984	0.0672506	0.0580276	0.116974	0.0458759	0.0850864	0.120635	0.070696	0.109066	0.0955122	0.0831434
1896	A_30_P01033416	chr15:90156889-90184564_R	chr15:90156889-90184564_R	0.00693231	0.00666988	0.00661948	0.00639682	0.098945	0.00917742	0.00839751	0.00790543	0.00746686	0.0144295	0.00796342	0.0095929
1897	ERCC-00104_60	ERCC-00104_60	ERCC-00104_60	0.00693051	0.0066706	0.00662339	0.00697887	0.00909111	0.00918114	0.00840288	0.0075774	0.00746832	0.00709439	0.00797407	0.00960117
1898	A_30_P01028215	chr19:5801802-5802597_R	chr19:5801802-5802597_R	232.145	204.176	227.821	201.581	209.207	214.896	214.828	233.841	234.939	199.736	233.028	260.703
1899	A_55_P2153126	Gm11595	NM_001126322	0.00693209	0.00774786	0.00663366	0.0158499	0.098528	0.0125863	0.0084173	0.0139112	0.00747436	0.00710326	0.00799643	0.0096209
1900	A_30_P01026791	chr17:74580316-74599991_F	chr17:74580316-74599991_F	0.00784125	0.00667834	0.00664081	0.00640551	0.0141024	0.036959	0.00842654	0.00759421	0.00748011	0.00710998	0.00801057	0.00963237
1901	(+)E1A_r60_a97	E1A_r60_a97	E1A_r60_a97	14.0006	13.395	13.6712	12.2266	12.0786	12.6608	13.8313	14.8422	14.7053	13.9965	14.6247	19.0511
1902	A_55_P2095558	1600027J07Rik	NR_036588	0.023055	0.02174	0.0158225	0.0204734	0.0175439	0.0135893	0.0963574	0.0221931	0.0389216	0.0237573	0.0303691	0.0207472
1903	A_66_P120745	Armc1	NM_028840	9.68373	9.93404	8.3053	10.2398	9.50599	10.3979	9.3198	9.45377	9.7632	10.4636	10.926	11.4426
1904	A_55_P2090500	A_55_P2090500	A_55_P2090500	0.00694681	0.00670061	0.00667719	0.00642764	0.00913803	0.00924223	0.0084746	0.00763075	0.00750887	0.00714262	0.00807459	0.00968806
1905	A_30_P01022333	chr7:119735208-119822808_R	chr7:119735208-119822808_R	0.0166039	0.00670854	0.0120729	0.00645875	0.00914944	0.00971557	0.00848937	0.0130713	0.00751863	0.00958699	0.00809306	0.00970426
1906	A_55_P2316863	4930524C18Rik	NR_045661	0.0141527	0.00671721	0.0154676	0.01466	0.00916209	0.0092701	0.0132725	0.0188574	0.00752881	0.00716354	0.0201066	0.00972126
1907	A_55_P2007761	Kcnmb2	NM_028231	0.0449878	0.0607413	0.0489745	0.0653892	0.0487923	0.0849737	0.0653518	0.0638193	0.0502338	0.0669482	0.0548811	0.066921
1908	A_51_P109274	Vmn1r233	NM_134202	0.00697647	0.00673642	0.00672726	0.00646292	0.00919079	0.00930191	0.00853992	0.0076829	0.0075539	0.00718718	0.00815408	0.00975853
1909	A_30_P01029155	chr6:86425510-86450160_R	chr6:86425510-86450160_R	0.0730384	0.0590434	0.0464397	0.0541474	0.0524673	0.0680544	0.0514569	0.0665044	0.0359289	0.0302457	0.0582591	0.0553326
1910	A_30_P01021632	chr19:14916280-14916548_F	chr19:14916280-14916548_F	0.00699613	0.00675841	0.00675708	0.00648488	0.00922337	0.00933896	0.00857995	0.00771383	0.00757855	0.00721284	0.00819891	0.0097987
1911	A_51_P175699	Mtfp1	NM_026443	5.04057	5.13374	4.70301	6.06182	4.0982	6.0522	4.59642	5.78209	4.71466	5.81051	5.78628	5.92635
1912	A_55_P1984541	A_55_P1984541	A_55_P1984541	1.29123	1.13175	1.10219	1.22964	0.978296	1.26971	1.18986	1.06285	1.09924	1.14231	0.913624	0.993419
1913	A_55_P2114288	Mrpl24	NM_026591	11.2872	12.1818	11.7147	12.2086	11.7016	11.7772	11.9904	12.1592	12.4675	12.499	11.0459	12.4547
1914	A_52_P228236	Tfrc	NM_011638	1.98084	1.90306	1.65989	2.3214	2.19146	2.15255	2.73693	1.94903	2.18651	2.1969	2.37957	2.12084
1915	A_30_P01030436	chr3:85783094-85783408_F	chr3:85783094-85783408_F	1.81948	1.49287	1.78602	1.33962	1.38617	1.34898	1.35086	1.69487	1.75757	1.18401	1.74526	1.73921
1916	A_30_P01027181	chr5:14921737-14978834_F	chr5:14921737-14978834_F	0.0806674	0.0953141	0.147549	0.057284	0.0758099	0.0707977	0.0668093	0.0823888	0.0819756	0.0671739	0.08804	0.0746703
1917	A_55_P2288047	Igkv6-15	BU523154	0.00708927	0.00685566	0.00688185	0.00658221	0.00936659	0.00949393	0.00874577	0.00784676	0.00769116	0.00731998	0.00837806	0.00996131
1918	A_30_P01032397	chrX:11671249-11671715_R	chrX:11671249-11671715_R	0.114963	0.0797755	0.0887111	0.102726	0.111736	0.111699	0.0635748	0.100129	0.104232	0.0927577	0.0887246	0.107686
1919	A_30_P01019429	chr3:18521534-18522194_R	chr3:18521534-18522194_R	0.0180206	0.0237631	0.00692216	0.0102302	0.00941395	0.0151816	0.0088	0.015659	0.0234756	0.0383283	0.00843332	0.010013
1920	A_30_P01031081	chr9:7214754-7225700_R	chr9:7214754-7225700_R	0.0202957	0.0312049	0.016595	0.0294071	0.0154433	0.0358073	0.0181656	0.0149955	0.0113581	0.0170196	0.00846181	0.0259586
1921	A_30_P01031971	chr4:138653689-138688814_F	chr4:138653689-138688814_F	0.00715551	0.00692115	0.00696396	0.00896247	0.00946435	0.00959695	0.00885674	0.00793554	0.00776701	0.0073868	0.0084899	0.0100662
1922	A_55_P2140829	Sprr2a1	AK033478	0.00717391	0.00693815	0.00698512	0.00666636	0.00948984	0.0269862	0.00888578	0.0079588	0.00778641	0.00740354	0.00851905	0.0100934
1923	A_52_P642167	Soat1	NM_009230	0.479424	0.413802	0.496503	0.35254	0.419908	0.356066	0.436999	0.429721	0.416458	0.324592	0.470491	0.412331
1924	A_30_P01020262	chr13:34186976-34210579_F	chr13:34186976-34210579_F	0.0114483	0.00876906	0.00702882	0.00670229	0.0106109	0.023924	0.00894488	0.00800609	0.0191409	0.0141517	0.0085757	0.0101475
1925	A_55_P2174863	Olfr766	XM_621234	0.00723027	0.00787158	0.00955913	0.0190896	0.00956773	0.00970627	0.00897521	0.0202636	0.0078452	0.00956275	0.0185081	0.0166719
1926	A_51_P112677	Mrpl50	NM_178603	5.6799	5.76237	5.21744	6.5026	5.85135	5.39447	5.52553	5.35857	5.92357	5.98531	5.67088	5.86358
1927	A_30_P01026689	chr14:76912477-76931702_F	chr14:76912477-76931702_F	0.00726924	0.00796664	0.00709407	0.00675713	0.00962177	0.00976158	0.009036	0.00807825	0.0158483	0.00748662	0.00865991	0.0102303
1928	A_30_P01019864	chr15:102920547-102933472_R	chr15:102920547-102933472_R	0.0831943	0.0712815	0.0613491	0.0692654	0.0912865	0.0746206	0.0781899	0.0756043	0.0543594	0.0565428	0.0661577	0.0645184
1929	A_52_P265051	Sertm1	NM_177854	0.854122	0.776375	0.819942	0.595211	0.551931	0.628857	1.0205	0.663634	0.737575	0.526644	0.397546	0.475771
1930	A_30_P01030150	chr6:67155508-67216941_R	chr6:67155508-67216941_R	0.00732973	0.00707801	0.00715849	0.00681213	0.0097019	0.00984436	0.0389585	0.00815048	0.00794229	0.00753294	0.00874061	0.0103119
1931	A_55_P2018337	Hdhd2	NM_001039201	0.0697595	0.0708109	0.0474781	0.0572286	0.0697204	0.0621276	0.0714798	0.0465226	0.0783542	0.0556943	0.0516916	0.0580587
1932	A_55_P2349752	8030494B02Rik	AK136342	0.754475	0.771332	0.863708	0.805161	0.726784	0.834807	0.617116	0.838025	0.824524	0.548672	0.727035	0.863117
1933	A_30_P01033406	chr18:46651944-46652663_R	chr18:46651944-46652663_R	0.308475	0.282844	0.267702	0.200873	0.175134	0.252983	0.170434	0.247422	0.274213	0.20869	0.232931	0.219982
1934	A_55_P2301995	D930002L09Rik	AK052951	0.078127	0.0590523	0.0534765	0.049401	0.0912853	0.0784011	0.0513111	0.081978	0.0770313	0.0763443	0.0741696	0.0764025
1935	3xSLv1	3xSLv1	3xSLv1	0.00742914	0.00715774	0.00725852	0.00689912	0.00982991	0.0526154	0.00927687	0.0082654	0.00802763	0.00759775	0.00886042	0.0104413
1936	A_55_P2130365	Nup93	AK045380	2.0579	1.97469	1.78243	2.75366	2.46972	2.35399	2.35564	2.53664	2.42412	2.24751	2.26069	3.04695
1937	A_30_P01026715	chr12:110738120-110769295_R	chr12:110738120-110769295_R	0.0367892	0.0298955	0.0153088	0.0238999	0.0161176	0.0305919	0.021577	0.0356043	0.00925342	0.0314106	0.0302829	0.0109808
1938	A_55_P2039601	Drosha	NM_001130149	7.70579	7.986	7.23258	8.7724	8.80402	9.12638	7.91756	8.08108	8.59547	9.19233	8.98096	9.33268
1939	A_51_P274504	Tex264	NM_011573	11.3454	11.3028	10.8468	10.8955	11.0534	10.9318	10.7504	10.8583	11.1245	11.2725	11.1051	11.3451
1940	A_55_P1970335	Teddm1	NM_178244	0.0582491	0.0431875	0.0454998	0.0497208	0.114241	0.0625663	0.0387686	0.0383536	0.0417908	0.050449	0.0380196	0.0420004
1941	A_51_P115462	Speer6-ps1	NR_001581	0.10799	0.116861	0.0930924	0.0159349	0.0099569	0.0348646	0.0697213	0.0581246	0.072292	0.00763891	0.0089647	0.0105731
1942	A_55_P2405353	C430002E04Rik	NR_040385	0.0075548	0.00723919	0.00736653	0.00699733	0.00997314	0.0101183	0.00945575	0.00839656	0.00810729	0.00764241	0.00897558	0.0105901
1943	A_55_P1971120	2010106E10Rik	NM_001168590	0.0075701	0.0072452	0.00737728	0.00700769	0.00999005	0.0101334	0.00947664	0.00840856	0.00811488	0.00764292	0.00898399	0.0106065
1944	A_30_P01027127	chr9:65647428-65677009_R	chr9:65647428-65677009_R	0.135827	0.143743	0.134792	0.11825	0.106196	0.110752	0.136753	0.125705	0.132245	0.103547	0.1336	0.15122
1945	A_55_P2025463	Brpf3	NM_001081315	0.579688	0.667092	0.655252	0.760934	0.662906	0.685025	0.588267	0.571711	0.700289	0.619823	0.80248	0.609559
1946	ETG10_195139	ETG10_195139	ETG10_195139	0.00760982	0.00725986	0.00740017	0.00703126	0.0100262	0.0101674	0.0223717	0.00844497	0.00812198	0.0076325	0.00899794	0.0106458
1947	A_51_P344399	Rilpl2	NM_030259	0.719395	0.826695	0.893254	0.743443	0.736122	0.843334	0.661219	0.711858	0.73103	0.717169	0.746199	0.71182
1948	A_30_P01025293	chr1:139713316-139913366_R	chr1:139713316-139913366_R	0.149652	0.139855	0.140277	0.136008	0.146318	0.142414	0.119126	0.156701	0.134969	0.103878	0.125736	0.141659
1949	A_30_P01028064	chr14:26834450-26847000_F	chr14:26834450-26847000_F	0.764898	0.744166	0.690243	0.792041	0.723996	0.787547	0.841146	0.787999	0.646762	0.642574	0.691274	0.676514
1950	A_55_P2013445	Obscn	NM_199152	0.0162546	0.0221887	0.0207909	0.0070419	0.0101288	0.0229523	0.0095747	0.00846499	0.00810369	0.011498	0.00897791	0.0189178
1951	A_51_P120823	Olfr868	NM_146559	0.118624	0.114708	0.129923	0.12668	0.127879	0.131864	0.145879	0.109354	0.0952959	0.0728416	0.0685793	0.0955664
1952	A_66_P127432	Tial1	NM_009383	5.22819	5.03996	5.22429	5.13668	5.45638	5.17157	5.62133	5.70528	5.19038	5.78384	5.99655	5.56115
1953	A_51_P497113	Igf2bp1	NM_009951	0.00765776	0.00722849	0.00738552	0.00703094	0.0100326	0.0101657	0.00958342	0.00845788	0.00806431	0.00753393	0.00893049	0.0106722
1954	A_30_P01024911	chr2:173105462-173126187_R	chr2:173105462-173126187_R	0.00765804	0.00721519	0.0201645	0.0137952	0.0100223	0.0360965	0.00958043	0.00845049	0.0140622	0.00845234	0.029197	0.0210325
1955	A_51_P118223	Gm1943	NR_002928	0.766687	0.804547	0.68444	0.856671	0.934116	0.827585	0.897457	0.770151	0.84351	0.932564	0.765981	0.842799
1956	A_55_P2066478	Crtc3	NM_173863	2.56573	2.58159	2.79498	3.14521	3.20446	2.9552	2.65538	2.5871	2.73925	2.8067	3.10919	2.88489
1957	A_52_P615247	ENSMUST00000096862	ENSMUST00000096862	0.124872	0.183999	0.127844	0.0840618	0.188082	0.108385	0.126847	0.112641	0.133435	0.236281	0.159641	0.093115
1958	A_30_P01021009	chr6:47967403-47968278_R	chr6:47967403-47968278_R	0.00763873	0.0238323	0.0203012	0.0370938	0.011049	0.0457976	0.00954145	0.0250225	0.0127117	0.00738139	0.0265854	0.0106153
1959	A_30_P01018005	chr15:76193801-76194225_F	chr15:76193801-76194225_F	0.122241	0.116661	0.145721	0.184189	0.152841	0.238934	0.396987	0.141971	0.118908	0.103188	0.100662	0.132428
1960	A_55_P2163774	Crip1	NM_007763	33.8925	33.4963	32.8198	31.8853	36.2462	37.7761	32.4217	33.6957	24.7385	30.6605	45.1209	47.551
1961	A_55_P2225246	4831440D22Rik	AK028531	0.0497037	0.0537838	0.0521005	0.0494029	0.0275764	0.0405042	0.0739505	0.0283668	0.0495994	0.0515627	0.0447167	0.0513886
1962	A_51_P110640	Klk1b11	NM_010640	0.00758172	0.00701471	0.0071772	0.00687337	0.00981914	0.00993629	0.00944307	0.00828638	0.00778258	0.00720332	0.00858742	0.0105139
1963	A_55_P2047617	A_55_P2047617	A_55_P2047617	0.00772517	0.0113934	0.0264767	0.0311453	0.0183019	0.00989178	0.0229373	0.0209196	0.00773429	0.0127065	0.00852826	0.0401618
1964	A_30_P01019337	chr12:72103832-72116875_F	chr12:72103832-72116875_F	0.00753804	0.00693543	0.00709639	0.00680848	0.00972988	0.00984308	0.00937236	0.00821169	0.00768366	0.00709487	0.00847023	0.0104419
1965	A_52_P80944	Zfp36	NM_011756	0.0445226	0.0439961	0.342848	0.0526063	0.0434175	0.0770997	0.065356	0.0289677	0.0401291	0.0617703	0.0555114	0.0104018
1966	A_30_P01029001	chr6:67052066-67119366_F	chr6:67052066-67119366_F	0.00748248	0.00684349	0.0532261	0.00673138	0.00962226	0.00973064	0.00928435	0.00812408	0.00756853	0.00697142	0.0083254	0.010357
1967	A_55_P2152991	Ccdc64	NM_001080808	0.123541	0.0971044	0.108326	0.15198	0.10897	0.121786	0.145769	0.118879	0.132747	0.172634	0.0853995	0.131555
1968	A_30_P01020174	chr14:79248990-79315446_F	chr14:79248990-79315446_F	0.0177124	0.0217544	0.00880624	0.0215871	0.00949821	0.0206601	0.0187397	0.0176129	0.0219891	0.0125821	0.00816538	0.0114498
1969	A_55_P2157159	A_55_P2157159	A_55_P2157159	12.486	11.8843	10.4201	12.911	12.3938	13.0339	12.2813	9.86556	12.9422	13.2984	12.0468	13.2727
1970	A_30_P01030575	chr2:150080526-150082950_R	chr2:150080526-150082950_R	0.00948448	0.00727306	0.0151015	0.0098908	0.0100761	0.010796	0.00933299	0.0187234	0.0230362	0.0123891	0.0090524	0.010833
1971	A_30_P01019833	chr3:40439525-40509975_F	chr3:40439525-40509975_F	0.0680898	0.0627739	0.067894	0.0827761	0.0531789	0.0646296	0.0805813	0.0982871	0.0599048	0.0688556	0.0515404	0.0757361
1972	A_52_P263024	Lancl2	NM_133737	0.176249	0.171001	0.140993	0.192809	0.173687	0.185443	0.180543	0.164058	0.201863	0.202315	0.176499	0.204198
1973	ERCC-00108_60	ERCC-00108_60	ERCC-00108_60	0.00797364	0.00748751	0.00734274	0.00692403	0.0103476	0.010997	0.0095603	0.00856391	0.00858817	0.00793228	0.00923246	0.0109567
1974	A_55_P2100331	Tcp11l1	NM_177190	0.290481	0.311434	0.263463	0.283842	0.265769	0.532656	0.300869	0.335944	0.285572	0.279323	0.357412	0.249762
1975	A_51_P386539	Rnf125	NM_026301	2.27951	2.13398	1.65837	2.16862	2.41468	2.51354	2.12911	2.01225	2.54392	2.15217	2.12833	2.28546
1976	A_52_P641216	Galk2	NM_175154	2.46556	2.00251	1.58322	1.68618	2.08937	2.64152	2.03383	1.79792	2.13827	2.77413	1.51319	1.97406
1977	A_55_P2177941	Tmem208	NM_025486	5.43312	4.77078	4.32138	5.18497	5.23527	5.22801	5.18542	4.61954	5.37362	5.71526	5.09745	5.43101
1978	A_51_P111462	Arl15	NM_172595	2.92731	2.87269	2.29415	3.77466	3.71656	3.12776	3.67586	2.76072	3.87073	3.97432	3.55242	3.5361
1979	A_30_P01022700	chr4:21683562-21694350_F	chr4:21683562-21694350_F	0.176548	0.142254	0.114635	0.172541	0.141851	0.140811	0.142269	0.125886	0.179368	0.141536	0.171133	0.115205
1980	A_30_P01026068	chr1:183783306-183834531_F	chr1:183783306-183834531_F	0.0159851	0.0102287	0.0196471	0.0153377	0.027673	0.0159984	0.0120238	0.00890347	0.0323522	0.0422129	0.0436091	0.0424106
1981	A_30_P01023446	chr10:5950116-5958250_R	chr10:5950116-5958250_R	0.0752752	0.053752	0.0747193	0.103243	0.0607001	0.0471097	0.0403989	0.0693111	0.073114	0.0636621	0.114592	0.0674665
1982	A_55_P2066329	Med28	NM_025895	0.343108	0.355882	0.302326	0.326946	0.37316	0.35282	0.345739	0.267278	0.372851	0.411505	0.386264	0.381232
1983	A_30_P01024631	chr5:74487385-74497428_F	chr5:74487385-74497428_F	0.183984	0.145591	0.163648	0.150716	0.173861	0.135385	0.184848	0.155221	0.0977218	0.133933	0.12171	0.165295
1984	A_30_P01028440	chr10:96096995-96097589_F	chr10:96096995-96097589_F	0.393307	0.322263	0.313933	0.39752	0.340625	0.40757	0.372391	0.310495	0.344352	0.381314	0.35456	0.453238
1985	A_30_P01025718	chr13:74642700-74701900_R	chr13:74642700-74701900_R	0.0744727	0.0578776	0.0734281	0.0790659	0.0699439	0.132149	0.0627333	0.0598688	0.0818723	0.0534262	0.0475788	0.059743
1986	A_30_P01023491	chr1:196843592-196865102_F	chr1:196843592-196865102_F	0.068404	0.0647571	0.153291	0.108923	0.0283175	0.19427	0.0451835	0.0918729	0.0373311	0.0355175	0.0450893	0.06085
1987	A_55_P1954346	Ttc25	NM_028918	0.0683091	0.0514829	0.0812961	0.0436836	0.0342753	0.104761	0.0415523	0.0620238	0.0425654	0.0351995	0.0542451	0.0587638
1988	A_51_P184062	Hbs1l	NM_019702	7.37042	7.20041	6.44108	8.06836	7.81067	7.40222	7.27656	7.33603	7.77379	7.53037	7.99089	7.65102
1989	A_55_P2119932	A_55_P2119932	A_55_P2119932	0.00847769	0.00802648	0.017916	0.0137785	0.0109953	0.0154968	0.0100614	0.0100152	0.00909939	0.00838194	0.0147319	0.0376994
1990	A_52_P28651	Pvrl1	NM_021424	4.81994	4.40975	4.01076	4.09182	4.84682	4.0471	4.90322	5.77191	5.38631	4.02156	4.41924	4.76258
1991	A_55_P2023617	Kiss1r	NM_053244	0.384893	0.47107	0.419646	0.46083	0.404972	0.400987	0.332182	0.445972	0.445078	0.471884	0.447249	0.465101
1992	A_52_P174721	Defb20	NM_176950	0.00847673	0.0161886	0.0110815	0.0138859	0.0109916	0.0112629	0.0100468	0.00904848	0.0129764	0.00837666	0.00948983	0.023695
1993	A_55_P2189903	A730011C13Rik	AK083419	0.0455067	0.0567453	0.0465743	0.0584539	0.0491549	0.0363337	0.0314469	0.0593946	0.0302257	0.0278228	0.0171896	0.0181587
1994	A_55_P2098840	A_55_P2098840	A_55_P2098840	0.0153262	0.0177809	0.045264	0.0457428	0.0109722	0.0195818	0.0148382	0.0143531	0.0169265	0.0173106	0.0232791	0.0212075
1995	A_30_P01033159	chr6:54591416-54597566_R	chr6:54591416-54597566_R	0.570724	0.609181	0.566288	0.668883	0.771282	0.464818	0.565449	0.574463	0.659194	0.527235	0.582678	0.58299
1996	A_66_P133204	Ankrd50	ENSMUST00000094300	1.86436	1.58754	1.54378	1.85405	1.71619	1.63422	1.8689	1.80625	1.93934	1.60378	1.74298	1.76891
1997	A_30_P01029157	chr16:23992037-24001037_F	chr16:23992037-24001037_F	0.00842669	0.0161716	0.0254334	0.0113591	0.0109225	0.0111254	0.00996964	0.00912806	0.0090181	0.00832203	0.013297	0.0109155
[truncated: 60,979 more rows]
